# Supplementary material for: The Effect on the Transcriptome of Anemone coronaria following Infection with Rust (Tranzschelia discolor)
Source: PLoS One. 2015 Mar 13;10(3):e0118565. doi: 10.1371/journal.pone.0118565 (PMC4359109; doi:10.1371/journal.pone.0118565)
Supplement: S2 Table — Sheet one: up regulated genes of Tranzschelia discolor; sheets two and three: up and down regulated genes of Anemone coronaria respectively. (XLSX) [file pone.0118565.s002.xlsx]

## Sheet: UP regulated T. discolor
Contig ID	baseMeanA	baseMeanB	log2FoldChange	pval	Seq. Description	ACC number	E-VALUE
26472	0	2	0.66493	1	14-3-3 protein [Melam larici-populina]	ABS86195	9.07551e-15
20763	0	11	0.102862	1	14-3-3 protein [Melam medusae f. sp. deltoidis]	ABS86241	2.24266e-88
23417	0	8	0.191526	1	20S proteasome subunit [Melam larici-populina 98AG31]	EGG11403	1.34745e-67
22196	0	3	0.530267	1	20S proteasome subunit beta 4 [PUCCINIA graminis f. sp. tritici CRL 75-36-700-3]	EHS62553	3.48408e-35
22386	0	2	0.66493	1	20S proteasome subunit beta 6 [PUCCINIA graminis f. sp. tritici CRL 75-36-700-3]	EFP86392	1.01773e-33
21650	0	7	0.232934	1	20S proteasome subunit beta 7 [PUCCINIA graminis f. sp. tritici CRL 75-36-700-3]	EFP92645	5.38212e-39
20413	0	5	0.350129	1	26S protease regulatory subunit 7 [PUCCINIA graminis f. sp. tritici CRL 75-36-700-3]	EFP89820	2.78292e-18
25995	0	3	0.530267	1	26S proteasome non-ATPase regulatory subunit 1 [PUCCINIA graminis f. sp. tritici CRL 75-36-700-3] >gi|309304700|gb|EFP81291.1| HYPOTHETICAL protein PGTG_06912 [PUCCINIA graminis f. sp. tritici CRL 75-36-700-3]	XP_003325710	9.87098e-24
12612	0	3	0.530267	1	26S proteasome non-ATPase regulatory subunit 12 [PUCCINIA graminis f. sp. tritici CRL 75-36-700-3] >gi|309303480|gb|EFP80071.1| HYPOTHETICAL protein PGTG_05296 [PUCCINIA graminis f. sp. tritici CRL 75-36-700-3]	XP_003324490	1.21593e-45
24676	0	5	0.350129	1	26S proteasome non-ATPase regulatory subunit 6 [PUCCINIA graminis f. sp. tritici CRL 75-36-700-3]	XP_003321166	1.04227e-88
14644	0	2	0.66493	1	26S proteasome regulatory subunit 6B [PUCCINIA graminis f. sp. tritici CRL 75-36-700-3] >gi|375166409|gb|EHS63149.1| 26S protease regulatory subunit 6B [PUCCINIA graminis f. sp. tritici CRL 75-36-700-3]	XP_003319385	7.17794e-40
21642	0	14	0.0560289	1	26S proteasome regulatory subunit 6B [PUCCINIA graminis f. sp. tritici CRL 75-36-700-3] >gi|375166409|gb|EHS63149.1| 26S protease regulatory subunit 6B [PUCCINIA graminis f. sp. tritici CRL 75-36-700-3]	XP_003319385	2.65543e-58
25846	0	2	0.66493	1	26S proteasome regulatory subunit S10B [PUCCINIA graminis f. sp. tritici CRL 75-36-700-3] >gi|309301558|gb|EFP78149.1| 26S protease subunit rpt4 [PUCCINIA graminis f. sp. tritici CRL 75-36-700-3]	XP_003322568	6.9198e-37
23613	0	2	0.66493	1	2-nitropropane dioxygenase [PUCCINIA graminis f. sp. tritici CRL 75-36-700-3] >gi|309301332|gb|EFP77923.1| enoyl-[acyl-carrier protein] reductase I [PUCCINIA graminis f. sp. tritici CRL 75-36-700-3]	XP_003322342	1.4761e-10
26355	0	2	0.66493	1	2-oxoglutarate dehydrogenase E1 component [PUCCINIA graminis f. sp. tritici CRL 75-36-700-3]	XP_003321098	2.03833e-09
26230	0	4	0.430439	1	3-ketoacyl-CoA thiolase A [PUCCINIA graminis f. sp. tritici CRL 75-36-700-3] >gi|309308635|gb|EFP85226.1| acetyl-CoA acyltransferase [PUCCINIA graminis f. sp. tritici CRL 75-36-700-3]	XP_003329645	3.14778e-61
26231	0	1	1	1	3-ketoacyl-CoA thiolase A [PUCCINIA graminis f. sp. tritici CRL 75-36-700-3] >gi|309308635|gb|EFP85226.1| acetyl-CoA acyltransferase [PUCCINIA graminis f. sp. tritici CRL 75-36-700-3]	XP_003329645	1.48433e-43
25368	0	8	0.191526	1	40S RIBOSOMAL protein S10 [PUCCINIA graminis f. sp. tritici CRL 75-36-700-3] >gi|309297577|gb|EFP74168.1| 40S RIBOSOMAL protein S20 [PUCCINIA graminis f. sp. tritici CRL 75-36-700-3]	XP_003307174	1.52945e-46
21447	0	12	0.0835669	1	40S RIBOSOMAL protein S11 [PUCCINIA graminis f. sp. tritici CRL 75-36-700-3] >gi|309299800|gb|EFP76391.1| 40S RIBOSOMAL protein S14a [PUCCINIA graminis f. sp. tritici CRL 75-36-700-3]	XP_003320810	9.12986e-23
22599	0	6	0.285179	1	40S RIBOSOMAL protein S17 [PUCCINIA graminis f. sp. tritici CRL 75-36-700-3]	XP_003323062	9.07181e-66
26369	0	5	0.350129	1	40S RIBOSOMAL protein S19 [PUCCINIA graminis f. sp. tritici CRL 75-36-700-3] >gi|309302883|gb|EFP79474.1| 40S RIBOSOMAL protein S19-A [PUCCINIA graminis f. sp. tritici CRL 75-36-700-3]	XP_003323893	6.19183e-44
23160	0	11	0.102862	1	40S RIBOSOMAL protein S23 [PUCCINIA graminis f. sp. tritici CRL 75-36-700-3] >gi|375172442|gb|EFP77918.2| 40S RIBOSOMAL protein S23 [PUCCINIA graminis f. sp. tritici CRL 75-36-700-3]	EFP94502	4.09708e-43
21291	0	12	0.0835669	1	40S RIBOSOMAL protein S24 [PUCCINIA graminis f. sp. tritici CRL 75-36-700-3] >gi|309307312|gb|EFP83903.1| small subunit RIBOSOMAL protein S24e [PUCCINIA graminis f. sp. tritici CRL 75-36-700-3]	XP_003328322	3.13205e-71
22429	0	10	0.126722	1	40S RIBOSOMAL protein S3 [PUCCINIA graminis f. sp. tritici CRL 75-36-700-3]	EFP88552	3.43526e-63
22418	0	1	1	1	40S RIBOSOMAL protein S3 [PUCCINIA graminis f. sp. tritici CRL 75-36-700-3] >gi|331252751|ref|XP_003338900.1| 40S RIBOSOMAL protein S3 [PUCCINIA graminis f. sp. tritici CRL 75-36-700-3] >gi|309315181|gb|EFP91772.1| 40S RIBOSOMAL protein S1 [PUCCINIA graminis f. sp. tritici CRL 75-36-700-3] >gi|309317890|gb|EFP94481.1| 40S RIBOSOMAL protein S1 [PUCCINIA graminis f. sp. tritici CRL 75-36-700-3]	XP_003336191	6.63171e-19
24740	0	2	0.66493	1	40S RIBOSOMAL protein S5 [PUCCINIA graminis f. sp. tritici CRL 75-36-700-3] >gi|309303394|gb|EFP79985.1| 40S RIBOSOMAL protein S5 [PUCCINIA graminis f. sp. tritici CRL 75-36-700-3]	XP_003324404	1.86394e-36
24741	0	7	0.232934	1	40S RIBOSOMAL protein S5 [PUCCINIA graminis f. sp. tritici CRL 75-36-700-3] >gi|309303394|gb|EFP79985.1| 40S RIBOSOMAL protein S5 [PUCCINIA graminis f. sp. tritici CRL 75-36-700-3]	XP_003324404	2.10383e-23
26368	0	1	1	1	40S RIBOSOMAL protein S5 [PUCCINIA graminis f. sp. tritici CRL 75-36-700-3] >gi|309303394|gb|EFP79985.1| 40S RIBOSOMAL protein S5 [PUCCINIA graminis f. sp. tritici CRL 75-36-700-3]	XP_003324404	7.22953e-33
26998	0	1	1	1	40S RIBOSOMAL protein S5 [PUCCINIA graminis f. sp. tritici CRL 75-36-700-3] >gi|309303394|gb|EFP79985.1| 40S RIBOSOMAL protein S5 [PUCCINIA graminis f. sp. tritici CRL 75-36-700-3]	XP_003324404	9.54103e-21
21343	0	5	0.350129	1	40S RIBOSOMAL protein S5 [PUCCINIA graminis f. sp. tritici CRL 75-36-700-3] >gi|309307895|gb|EFP84486.1| small subunit RIBOSOMAL protein S2e [PUCCINIA graminis f. sp. tritici CRL 75-36-700-3]	XP_003328905	9.79916e-46
23884	0	11	0.102862	1	40S RIBOSOMAL protein S6 [PUCCINIA graminis f. sp. tritici CRL 75-36-700-3]	XP_003330126	1.24333e-73
20807	0	6	0.285179	1	40S RIBOSOMAL protein S8 [PUCCINIA graminis f. sp. tritici CRL 75-36-700-3] >gi|331231026|ref|XP_003328177.1| 40S RIBOSOMAL protein S8 [PUCCINIA graminis f. sp. tritici CRL 75-36-700-3] >gi|309307154|gb|EFP83745.1| 40S RIBOSOMAL protein S22 [PUCCINIA graminis f. sp. tritici CRL 75-36-700-3] >gi|309307167|gb|EFP83758.1| 40S RIBOSOMAL protein S22 [PUCCINIA graminis f. sp. tritici CRL 75-36-700-3]	XP_003328164	5.3295e-48
20775	0	14	0.0560289	1	40S RIBOSOMAL protein S9 [PUCCINIA graminis f. sp. tritici CRL 75-36-700-3] >gi|309304256|gb|EFP80847.1| 40S RIBOSOMAL protein S9-B [PUCCINIA graminis f. sp. tritici CRL 75-36-700-3]	XP_003325266	3.46414e-65
24810	0	2	0.66493	1	4-nitrophenylphosphatase [PUCCINIA graminis f. sp. tritici CRL 75-36-700-3] >gi|309313627|gb|EFP90218.1| HYPOTHETICAL protein PGTG_16496 [PUCCINIA graminis f. sp. tritici CRL 75-36-700-3]	XP_003334637	0.000602051
21428	0	9	0.15612	1	50S RIBOSOMAL protein L22 [PUCCINIA graminis f. sp. tritici CRL 75-36-700-3]	EFP89147	5.52738e-108
25277	0	2	0.66493	1	54S RIBOSOMAL protein L2 [PUCCINIA graminis f. sp. tritici CRL 75-36-700-3] >gi|309297890|gb|EFP74481.1| HYPOTHETICAL protein PGTG_00437 [PUCCINIA graminis f. sp. tritici CRL 75-36-700-3]	XP_003307487	2.30175e-17
5330	0	11	0.102862	1	60S acidic RIBOSOMAL protein P1 [Melam medusae f. sp. deltoidis]	ABS86539	4.32346e-23
23532	0	6	0.285179	1	60S RIBOSOMAL protein L15 [PUCCINIA graminis f. sp. tritici CRL 75-36-700-3] >gi|309301405|gb|EFP77996.1| 60S RIBOSOMAL protein L15-B [PUCCINIA graminis f. sp. tritici CRL 75-36-700-3]	XP_003322415	2.55975e-107
25379	0	6	0.285179	1	60S RIBOSOMAL protein L19 [PUCCINIA graminis f. sp. tritici CRL 75-36-700-3] >gi|309301577|gb|EFP78168.1| 50S RIBOSOMAL protein L19e [PUCCINIA graminis f. sp. tritici CRL 75-36-700-3]	XP_003322587	1.15841e-47
23655	0	14	0.0560289	1	60S RIBOSOMAL protein L2 [PUCCINIA graminis f. sp. tritici CRL 75-36-700-3] >gi|309306054|gb|EFP82645.1| 60S RIBOSOMAL protein L8 [PUCCINIA graminis f. sp. tritici CRL 75-36-700-3]	XP_003327064	1.9836e-128
25212	0	3	0.530267	1	60S RIBOSOMAL protein L21 [PUCCINIA graminis f. sp. tritici CRL 75-36-700-3] >gi|309304255|gb|EFP80846.1| 60S RIBOSOMAL protein L21-A [PUCCINIA graminis f. sp. tritici CRL 75-36-700-3]	XP_003325265	4.51279e-45
9927	0	10	0.126722	1	60S RIBOSOMAL protein L23 [PUCCINIA graminis f. sp. tritici CRL 75-36-700-3] >gi|2507312|sp|P51997.2|RL25_PUCGR RecName: Full=60S RIBOSOMAL protein L25 >gi|1707876|gb|AAB41938.1| RIBOSOMAL protein L25 [PUCCINIA graminis f. sp. avenae] >gi|309297511|gb|EFP74102.1| 60S RIBOSOMAL protein L25 [PUCCINIA graminis f. sp. tritici CRL 75-36-700-3]	XP_003307108	1.55434e-49
22607	0	7	0.232934	1	60S RIBOSOMAL protein L24 [PUCCINIA graminis f. sp. tritici CRL 75-36-700-3] >gi|309299513|gb|EFP76104.1| large subunit RIBOSOMAL protein L26e [PUCCINIA graminis f. sp. tritici CRL 75-36-700-3]	XP_003320523	7.82401e-55
23474	0	4	0.430439	1	60S RIBOSOMAL protein L3 [PUCCINIA graminis f. sp. tritici CRL 75-36-700-3] >gi|309308185|gb|EFP84776.1| 60S RIBOSOMAL protein L3 [PUCCINIA graminis f. sp. tritici CRL 75-36-700-3]	XP_003329195	1.99267e-61
22038	0	2	0.66493	1	60S RIBOSOMAL protein L36 [PUCCINIA graminis f. sp. tritici CRL 75-36-700-3] >gi|309297510|gb|EFP74101.1| 50S RIBOSOMAL protein L36e [PUCCINIA graminis f. sp. tritici CRL 75-36-700-3]	XP_003307107	6.49216e-32
22039	0	8	0.191526	1	60S RIBOSOMAL protein L36 [PUCCINIA graminis f. sp. tritici CRL 75-36-700-3] >gi|309297510|gb|EFP74101.1| 50S RIBOSOMAL protein L36e [PUCCINIA graminis f. sp. tritici CRL 75-36-700-3]	XP_003307107	4.94326e-33
21454	0	11	0.102862	1	60S RIBOSOMAL protein L37 [PUCCINIA graminis f. sp. tritici CRL 75-36-700-3]	XP_003337730	7.34178e-13
20664	0	12	0.0835669	1	60S RIBOSOMAL protein L40 [PUCCINIA graminis f. sp. tritici CRL 75-36-700-3] >gi|309306354|gb|EFP82945.1| large subunit RIBOSOMAL protein L40e [PUCCINIA graminis f. sp. tritici CRL 75-36-700-3]	XP_003327364	2.94242e-24
21021	0	9	0.15612	1	60S RIBOSOMAL protein L6 [PUCCINIA graminis f. sp. tritici CRL 75-36-700-3] >gi|331246700|ref|XP_003335982.1| 60S RIBOSOMAL protein L6 [PUCCINIA graminis f. sp. tritici CRL 75-36-700-3] >gi|309313199|gb|EFP89790.1| large subunit RIBOSOMAL protein L9e [PUCCINIA graminis f. sp. tritici CRL 75-36-700-3] >gi|309314972|gb|EFP91563.1| large subunit RIBOSOMAL protein L9e [PUCCINIA graminis f. sp. tritic…	XP_003334209	7.33239e-39
22649	0	9	0.15612	1	60S RIBOSOMAL protein L7 [PUCCINIA graminis f. sp. tritici CRL 75-36-700-3] >gi|309300209|gb|EFP76800.1| large subunit RIBOSOMAL protein L7e [PUCCINIA graminis f. sp. tritici CRL 75-36-700-3]	XP_003321219	1.0013e-41
22359	0	2	0.66493	1	AAA ATPase [Melam larici-populina 98AG31]	EGG00041	3.56547e-09
20423	0	4	0.430439	1	acetyl-CoA acetyltransferase [PUCCINIA graminis f. sp. tritici CRL 75-36-700-3] >gi|309314558|gb|EFP91149.1| acetyl-CoA C-acetyltransferase [PUCCINIA graminis f. sp. tritici CRL 75-36-700-3]	XP_003335568	5.12476e-38
26728	0	2	0.66493	1	acetylglutamate kinase, variant [PUCCINIA graminis f. sp. tritici CRL 75-36-700-3]	EHS63492	3.934e-20
23543	0	2	0.66493	1	aconitase [PUCCINIA graminis f. sp. tritici CRL 75-36-700-3] >gi|309315903|gb|EFP92494.1| aconitate hydratase, mitochondrial [PUCCINIA graminis f. sp. tritici CRL 75-36-700-3]	XP_003336913	2.01978e-13
23208	0	3	0.530267	1	actin [PUCCINIA graminis f. sp. tritici CRL 75-36-700-3] >gi|309306162|gb|EFP82753.1| actin-like protein 3 [PUCCINIA graminis f. sp. tritici CRL 75-36-700-3]	XP_003327172	1.09679e-69
26020	0	3	0.530267	1	acyl-CoA dehydrogenase [PUCCINIA graminis f. sp. tritici CRL 75-36-700-3] >gi|309314717|gb|EFP91308.1| isovaleryl-CoA dehydrogenase [PUCCINIA graminis f. sp. tritici CRL 75-36-700-3]	XP_003335727	7.73004e-88
25809	0	2	0.66493	1	adenylate kinase isoenzyme 2, mitochondrial [PUCCINIA graminis f. sp. tritici CRL 75-36-700-3] >gi|309299149|gb|EFP75740.1| adenylate kinase [PUCCINIA graminis f. sp. tritici CRL 75-36-700-3]	XP_003320159	1.50014e-40
25205	0	4	0.430439	1	adenyl-nucleotide exchange factor [PUCCINIA graminis f. sp. tritici CRL 75-36-700-3]	XP_003324877	3.11547e-14
22400	0	12	0.0835669	1	alanine aminotransferase 2 [PUCCINIA graminis f. sp. tritici CRL 75-36-700-3]	XP_003326532	5.39925e-61
21652	0	4	0.430439	1	alpha-galactosidase [PUCCINIA graminis f. sp. tritici CRL 75-36-700-3] >gi|309311985|gb|EFP88576.1| alpha-galactosidase [PUCCINIA graminis f. sp. tritici CRL 75-36-700-3]	XP_003332995	1.05704e-10
21651	0	3	0.530267	1	amino-oxidase [PUCCINIA graminis f. sp. tritici CRL 75-36-700-3] >gi|309313082|gb|EFP89673.1| HYPOTHETICAL protein PGTG_15636 [PUCCINIA graminis f. sp. tritici CRL 75-36-700-3]	XP_003334092	7.86667e-06
26632	0	2	0.66493	1	aminopeptidase [Melam larici-populina 98AG31]	EGG06276	2.60786e-28
23742	0	10	0.126722	1	aminotransferase [PUCCINIA graminis f. sp. tritici CRL 75-36-700-3]	EFP84136	5.43452e-37
26267	0	2	0.66493	1	AP-2 complex subunit sigma-1 [Phytophthora infestans T30-4] >gi|262110439|gb|EEY68491.1| AP-2 complex subunit sigma-1 [Phytophthora infestans T30-4]	XP_002905650	4.94817e-50
26881	0	2	0.66493	1	arf/Sar family protein [PUCCINIA graminis f. sp. tritici CRL 75-36-700-3]	EFP75604	3.14485e-10
25464	0	5	0.350129	1	arginase-1 [PUCCINIA graminis f. sp. tritici CRL 75-36-700-3] >gi|309313586|gb|EFP90177.1| arginase [PUCCINIA graminis f. sp. tritici CRL 75-36-700-3]	XP_003334596	7.94765e-53
26623	0	3	0.530267	1	argininosuccinate synthase [PUCCINIA graminis f. sp. tritici CRL 75-36-700-3] >gi|309309685|gb|EFP86276.1| argininosuccinate synthase [PUCCINIA graminis f. sp. tritici CRL 75-36-700-3]	XP_003330695	3.34571e-31
23581	0	3	0.530267	1	ARP2/3 actin-organizing complex subunit Arc34 [PUCCINIA graminis f. sp. tritici CRL 75-36-700-3]	XP_003328964	6.48374e-44
24453	0	4	0.430439	1	aspartate aminotransferase [PUCCINIA graminis f. sp. tritici CRL 75-36-700-3] >gi|309310091|gb|EFP86682.1| aspartate aminotransferase, mitochondrial [PUCCINIA graminis f. sp. tritici CRL 75-36-700-3]	XP_003331101	3.3112e-40
26872	0	2	0.66493	1	aspartate-semialdehyde dehydrogenase [PUCCINIA graminis f. sp. tritici CRL 75-36-700-3] >gi|309298093|gb|EFP74684.1| aspartate-semialdehyde dehydrogenase [PUCCINIA graminis f. sp. tritici CRL 75-36-700-3]	XP_003307690	1.51338e-08
21051	0	8	0.191526	1	ATP citrate (Pro-S)-lyase [PUCCINIA graminis f. sp. tritici CRL 75-36-700-3]	EHS64806	2.33194e-43
20733	0	7	0.232934	1	ATP phosphoribosyltransferase [PUCCINIA graminis f. sp. tritici CRL 75-36-700-3] >gi|309300505|gb|EFP77096.1| ATP phosphoribosyltransferase [PUCCINIA graminis f. sp. tritici CRL 75-36-700-3]	XP_003321515	0.000229029
21031	0	9	0.15612	1	ATP synthase subunit beta [PUCCINIA graminis f. sp. tritici CRL 75-36-700-3] >gi|309312612|gb|EFP89203.1| HYPOTHETICAL protein PGTG_15044 [PUCCINIA graminis f. sp. tritici CRL 75-36-700-3]	XP_003333622	2.23256e-30
21084	0	6	0.285179	1	ATP synthase subunit D [PUCCINIA graminis f. sp. tritici CRL 75-36-700-3] >gi|309317569|gb|EFP94160.1| HYPOTHETICAL protein PGTG_20020 [PUCCINIA graminis f. sp. tritici CRL 75-36-700-3]	XP_003338579	8.91209e-39
25288	0	5	0.350129	1	ATP synthase subunit gamma [PUCCINIA graminis f. sp. tritici CRL 75-36-700-3] >gi|309307957|gb|EFP84548.1| ATP synthase F1, gamma subunit [PUCCINIA graminis f. sp. tritici CRL 75-36-700-3]	XP_003328967	3.06333e-27
26920	0	2	0.66493	1	ATP-binding protein [PUCCINIA graminis f. sp. tritici CRL 75-36-700-3]	EFP74370	5.22612e-10
21580	0	8	0.191526	1	ATP-dependent RNA helicase SUB2 [PUCCINIA graminis f. sp. tritici CRL 75-36-700-3] >gi|309305351|gb|EFP81942.1| ATP-dependent RNA helicase uap56 [PUCCINIA graminis f. sp. tritici CRL 75-36-700-3]	XP_003326361	6.74865e-118
23963	0	3	0.530267	1	beta-galactosidase [PUCCINIA graminis f. sp. tritici CRL 75-36-700-3]	XP_003334387	2.34882e-22
21128	0	3	0.530267	1	bifunctional purine biosynthesis protein PURH [PUCCINIA graminis f. sp. tritici CRL 75-36-700-3] >gi|309316254|gb|EFP92845.1| phosphoribosylaminoimidazolecarboxamide formyltransferase [PUCCINIA graminis f. sp. tritici CRL 75-36-700-3]	XP_003337264	4.64769e-14
23425	0	3	0.530267	1	biotin synthase [PUCCINIA graminis f. sp. tritici CRL 75-36-700-3] >gi|375167728|gb|EHS63496.1| biotin synthase [PUCCINIA graminis f. sp. tritici CRL 75-36-700-3]	XP_003328496	4.02913e-12
26195	0	3	0.530267	1	branched-chain-amino-acid aminotransferase [PUCCINIA graminis f. sp. tritici CRL 75-36-700-3] >gi|309309745|gb|EFP86336.1| branched-chain amino acid aminotransferase [PUCCINIA graminis f. sp. tritici CRL 75-36-700-3]	XP_003330755	2.71616e-41
24750	0	2	0.66493	1	bromodomain and PHD finger-containing protein 3 [PUCCINIA graminis f. sp. tritici CRL 75-36-700-3]	XP_003337885	9.76328e-20
26789	0	2	0.66493	1	bub2 protein [PUCCINIA graminis f. sp. tritici CRL 75-36-700-3] >gi|309313221|gb|EFP89812.1| HYPOTHETICAL protein PGTG_15768 [PUCCINIA graminis f. sp. tritici CRL 75-36-700-3]	XP_003334231	4.20244e-32
24394	0	5	0.350129	1	C-4 methylsterol oxidase [PUCCINIA graminis f. sp. tritici CRL 75-36-700-3] >gi|309304815|gb|EFP81406.1| methylsterol monooxygenase [PUCCINIA graminis f. sp. tritici CRL 75-36-700-3]	XP_003325825	2.68812e-61
24344	0	3	0.530267	1	C-8 sterol isomerase [PUCCINIA graminis f. sp. tritici CRL 75-36-700-3]	EFP89199	5.01267e-19
23565	0	6	0.285179	1	Caf16p [PUCCINIA graminis f. sp. tritici CRL 75-36-700-3] >gi|309304344|gb|EFP80935.1| HYPOTHETICAL protein PGTG_07187 [PUCCINIA graminis f. sp. tritici CRL 75-36-700-3]	XP_003325354	3.50789e-14
23885	0	8	0.191526	1	calcium-translocating P-type ATPase [PUCCINIA graminis f. sp. tritici CRL 75-36-700-3]	XP_003327868	5.85591e-32
21215	0	4	0.430439	1	CAMK/CAMK1 protein kinase [PUCCINIA graminis f. sp. tritici CRL 75-36-700-3]	EFP80523	1.57057e-15
25845	0	2	0.66493	1	carbamoyl-phosphate synthase arginine-specific large chain [PUCCINIA graminis f. sp. tritici CRL 75-36-700-3] >gi|309301858|gb|EFP78449.1| carbamoyl-phosphate synthase arginine-specific large chain [PUCCINIA graminis f. sp. tritici CRL 75-36-700-3]	XP_003322868	4.37636e-32
21613	0	13	0.0683089	1	carbohydrate-binding module family 12 [Melam larici-populina 98AG31]	EGG12482	7.75082e-33
23707	0	4	0.430439	1	carboxylic acid transporter [PUCCINIA graminis f. sp. tritici CRL 75-36-700-3]	XP_003326070	0.0661267
24250	0	5	0.350129	1	carboxypeptidase C [PUCCINIA graminis f. sp. tritici CRL 75-36-700-3]	EFP76336	1.36103e-26
24023	0	2	0.66493	1	carboxypeptidase Y [PUCCINIA graminis f. sp. tritici CRL 75-36-700-3]	XP_003320755	1.44033e-20
25275	0	2	0.66493	1	carnitine palmitoyltransferase II [PUCCINIA graminis f. sp. tritici CRL 75-36-700-3] >gi|309301819|gb|EFP78410.1| HYPOTHETICAL protein PGTG_04366 [PUCCINIA graminis f. sp. tritici CRL 75-36-700-3]	XP_003322829	1.36207e-44
23582	0	9	0.15612	1	Cas41p [PUCCINIA graminis f. sp. tritici CRL 75-36-700-3]	XP_003322459	1.66133e-07
26759	0	1	1	1	cell division protease ftsH [PUCCINIA graminis f. sp. tritici CRL 75-36-700-3] >gi|309309972|gb|EFP86563.1| AFG3 family protein [PUCCINIA graminis f. sp. tritici CRL 75-36-700-3]	XP_003330982	4.07671e-22
26760	0	1	1	1	cell division protease ftsH [PUCCINIA graminis f. sp. tritici CRL 75-36-700-3] >gi|309309972|gb|EFP86563.1| AFG3 family protein [PUCCINIA graminis f. sp. tritici CRL 75-36-700-3]	XP_003330982	7.99287e-12
23111	0	8	0.191526	1	cell wall integrity protein scw1 [Melam larici-populina 98AG31]	EGG02865	0.00463042
25662	0	2	0.66493	1	chaperone protein dnaK [PUCCINIA graminis f. sp. tritici CRL 75-36-700-3] >gi|309298660|gb|EFP75251.1| hsp70-like protein [PUCCINIA graminis f. sp. tritici CRL 75-36-700-3]	XP_003319670	2.59487e-08
26906	0	2	0.66493	1	chitinase 6 [PUCCINIA graminis f. sp. tritici CRL 75-36-700-3] >gi|309300135|gb|EFP76726.1| HYPOTHETICAL protein PGTG_02187 [PUCCINIA graminis f. sp. tritici CRL 75-36-700-3]	XP_003321145	4.67993e-20
25613	0	7	0.232934	1	class II aldolase/adducin domain-containing protein [PUCCINIA graminis f. sp. tritici CRL 75-36-700-3] >gi|309301745|gb|EFP78336.1| HYPOTHETICAL protein PGTG_04292 [PUCCINIA graminis f. sp. tritici CRL 75-36-700-3]	XP_003322755	1.34759e-54
24140	0	2	0.66493	1	cleavage and polyadenylation specificity factor subunit 5 [PUCCINIA graminis f. sp. tritici CRL 75-36-700-3] >gi|309303537|gb|EFP80128.1| autocrine motility factor receptor [PUCCINIA graminis f. sp. tritici CRL 75-36-700-3]	XP_003324547	2.75962e-49
22060	0	5	0.350129	1	CMGC/CDK/CDC2 protein kinase [PUCCINIA graminis f. sp. tritici CRL 75-36-700-3]	XP_003325063	4.99723e-07
25351	0	10	0.126722	1	CMGC/CDK/CRK7 protein kinase [PUCCINIA graminis f. sp. tritici CRL 75-36-700-3]	XP_003319661	5.13012e-10
25015	0	2	0.66493	1	CMGC/CK2 protein kinase [PUCCINIA graminis f. sp. tritici CRL 75-36-700-3]	XP_003333667	1.67337e-47
22797	0	9	0.15612	1	coatomer beta' subunit [PUCCINIA graminis f. sp. tritici CRL 75-36-700-3] >gi|309301907|gb|EFP78498.1| HYPOTHETICAL protein PGTG_04454 [PUCCINIA graminis f. sp. tritici CRL 75-36-700-3]	XP_003322917	1.58954e-15
23368	0	3	0.530267	1	coatomer subunit alpha [PUCCINIA graminis f. sp. tritici CRL 75-36-700-3]	XP_003333645	5.32858e-13
25992	0	2	0.66493	1	coiled-coil protein [PUCCINIA graminis f. sp. tritici CRL 75-36-700-3] >gi|309297573|gb|EFP74164.1| HYPOTHETICAL protein PGTG_00120 [PUCCINIA graminis f. sp. tritici CRL 75-36-700-3]	XP_003307170	3.68255e-16
25324	0	1	1	1	conserved HYPOTHETICAL protein [Arthroderma otae CBS 113480] >gi|238845178|gb|EEQ34840.1| conserved HYPOTHETICAL protein [Arthroderma otae CBS 113480]	XP_002843876	51.6398
23476	0	2	0.66493	1	COPII-coated vesicle component Sec13 [PUCCINIA graminis f. sp. tritici CRL 75-36-700-3] >gi|309299443|gb|EFP76034.1| HYPOTHETICAL protein PGTG_01365 [PUCCINIA graminis f. sp. tritici CRL 75-36-700-3]	XP_003320453	1.44457e-25
26102	0	3	0.530267	1	COPII-coated vesicle protein [PUCCINIA graminis f. sp. tritici CRL 75-36-700-3]	XP_003329764	2.41367e-47
25795	0	2	0.66493	1	coproporphyrinogen III oxidase [PUCCINIA graminis f. sp. tritici CRL 75-36-700-3]	EFP93206	1.01557e-13
23518	0	4	0.430439	1	crossover junction endonuclease mus81 [PUCCINIA graminis f. sp. tritici CRL 75-36-700-3]	XP_003320987	1.62621e-12
21159	0	2	0.66493	1	cryptochrome DASH [PUCCINIA graminis f. sp. tritici CRL 75-36-700-3] >gi|309305620|gb|EFP82211.1| HYPOTHETICAL protein PGTG_07608 [PUCCINIA graminis f. sp. tritici CRL 75-36-700-3]	XP_003326630	0.0100688
23020	0	10	0.126722	1	cyclin-dependent kinase regulatory subunit CKS1 [PUCCINIA graminis f. sp. tritici CRL 75-36-700-3]	EFP76571	9.6799e-58
26634	0	3	0.530267	1	cysteine desulfurase [PUCCINIA graminis f. sp. tritici CRL 75-36-700-3]	XP_003324241	3.7241e-14
24163	0	3	0.530267	1	cytochrome P450 67 [PUCCINIA graminis f. sp. tritici CRL 75-36-700-3]	XP_003322304	3.08955e-22
22018	0	2	0.66493	1	cytochrome P450 monooxygenase [Melam larici-populina 98AG31]	EGF99140	2.21698e-17
21555	0	3	0.530267	1	cytoplasm protein [PUCCINIA graminis f. sp. tritici CRL 75-36-700-3] >gi|309305119|gb|EFP81710.1| HYPOTHETICAL protein PGTG_07959 [PUCCINIA graminis f. sp. tritici CRL 75-36-700-3]	XP_003326129	4.35441e-22
21175	0	3	0.530267	1	defender against cell death 1 [PUCCINIA graminis f. sp. tritici CRL 75-36-700-3] >gi|309306339|gb|EFP82930.1| HYPOTHETICAL protein PGTG_09898 [PUCCINIA graminis f. sp. tritici CRL 75-36-700-3]	XP_003327349	3.21749e-36
21320	0	7	0.232934	1	deoxyhypusine hydroxylase [PUCCINIA graminis f. sp. tritici CRL 75-36-700-3] >gi|309300683|gb|EFP77274.1| HYPOTHETICAL protein PGTG_03230 [PUCCINIA graminis f. sp. tritici CRL 75-36-700-3]	XP_003321693	4.50971e-30
24230	0	5	0.350129	1	dipeptidyl-peptidase 3 [PUCCINIA graminis f. sp. tritici CRL 75-36-700-3]	XP_003331541	6.43737e-62
22954	0	3	0.530267	1	diphthamide biosynthesis protein 2 [PUCCINIA graminis f. sp. tritici CRL 75-36-700-3]	XP_003328837	1.1715e-13
23332	0	4	0.430439	1	DNA mismatch repair protein MSH2 [PUCCINIA graminis f. sp. tritici CRL 75-36-700-3]	EFP76252	1.57472e-14
25815	0	2	0.66493	1	DNA replication licensing factor MCM5 [PUCCINIA graminis f. sp. tritici CRL 75-36-700-3]	XP_003325974	1.5447e-09
20874	0	2	0.66493	1	DNA replication licensing factor MCM6 [PUCCINIA graminis f. sp. tritici CRL 75-36-700-3] >gi|309301720|gb|EFP78311.1| minichromosome maintenance protein 6 [PUCCINIA graminis f. sp. tritici CRL 75-36-700-3]	XP_003322730	2.96119e-22
23220	0	2	0.66493	1	DNA-dependent DNA polymerase [PUCCINIA graminis f. sp. tritici CRL 75-36-700-3]	XP_003322150	1.27752e-40
23358	0	3	0.530267	1	DNA-directed RNA polymerase III subunit C1 [PUCCINIA graminis f. sp. tritici CRL 75-36-700-3]	EFP75753	2.0118e-57
25659	0	2	0.66493	1	DNAJ heat shock family protein [PUCCINIA graminis f. sp. tritici CRL 75-36-700-3] >gi|309311716|gb|EFP88307.1| DnaJ subfamily B member 4 [PUCCINIA graminis f. sp. tritici CRL 75-36-700-3]	XP_003332726	1.30367e-19
22805	0	4	0.430439	1	DnaJ subfamily C member 19 [PUCCINIA graminis f. sp. tritici CRL 75-36-700-3]	EHS62510	1.368e-25
26297	0	4	0.430439	1	Dnajc2-prov protein [PUCCINIA graminis f. sp. tritici CRL 75-36-700-3] >gi|309298584|gb|EFP75175.1| HYPOTHETICAL protein PGTG_01768 [PUCCINIA graminis f. sp. tritici CRL 75-36-700-3]	XP_003319594	0.0524874
25767	0	6	0.285179	1	dUTP pyrophosphatase [PUCCINIA graminis f. sp. tritici CRL 75-36-700-3]	EHS62970	1.22148e-40
27176	0	1	1	1	dUTP pyrophosphatase [PUCCINIA graminis f. sp. tritici CRL 75-36-700-3]	EHS62970	1.46811e-05
23589	0	4	0.430439	1	dynactin 5 [PUCCINIA graminis f. sp. tritici CRL 75-36-700-3]	EFP89403	7.05157e-52
20725	0	13	0.0683089	1	E3 ubiquitin ligase complex SCF subunit sconC [PUCCINIA graminis f. sp. tritici CRL 75-36-700-3]	EFP91369	7.40017e-38
24525	0	2	0.66493	1	elastinolytic metalloproteinase [PUCCINIA graminis f. sp. tritici CRL 75-36-700-3]	XP_003325871	5.21658e-15
22578	0	11	0.102862	1	elongation factor 1-beta [PUCCINIA graminis f. sp. tritici CRL 75-36-700-3] >gi|309297785|gb|EFP74376.1| elongation factor EF-1 beta subunit [PUCCINIA graminis f. sp. tritici CRL 75-36-700-3]	XP_003307382	3.44096e-38
20806	0	4	0.430439	1	elongation factor 1-gamma 1 [PUCCINIA graminis f. sp. tritici CRL 75-36-700-3] >gi|309298636|gb|EFP75227.1| HYPOTHETICAL protein PGTG_01820 [PUCCINIA graminis f. sp. tritici CRL 75-36-700-3]	XP_003319646	6.54788e-13
22972	0	5	0.350129	1	elongation factor 2 [PUCCINIA graminis f. sp. tritici CRL 75-36-700-3] >gi|309305129|gb|EFP81720.1| elongation factor 2 [PUCCINIA graminis f. sp. tritici CRL 75-36-700-3]	XP_003326139	7.55181e-47
21267	0	12	0.0835669	1	elongation factor 3 [PUCCINIA graminis f. sp. tritici CRL 75-36-700-3] >gi|309299445|gb|EFP76036.1| elongation factor EF-3 [PUCCINIA graminis f. sp. tritici CRL 75-36-700-3]	XP_003320455	3.51296e-59
25162	0	3	0.530267	1	embryo-specific protein [PUCCINIA graminis f. sp. tritici CRL 75-36-700-3] >gi|309305712|gb|EFP82303.1| HYPOTHETICAL protein PGTG_07700 [PUCCINIA graminis f. sp. tritici CRL 75-36-700-3]	XP_003326722	1.03662e-15
25882	0	2	0.66493	1	endoplasmic reticulum protein [PUCCINIA graminis f. sp. tritici CRL 75-36-700-3] >gi|309307904|gb|EFP84495.1| HYPOTHETICAL protein PGTG_10215 [PUCCINIA graminis f. sp. tritici CRL 75-36-700-3]	XP_003328914	4.43579e-07
20955	0	2	0.66493	1	endoplasmic reticulum vesicle protein 25 [PUCCINIA graminis f. sp. tritici CRL 75-36-700-3] >gi|309300374|gb|EFP76965.1| HYPOTHETICAL protein PGTG_02426 [PUCCINIA graminis f. sp. tritici CRL 75-36-700-3]	XP_003321384	1.52917e-19
22922	0	2	0.66493	1	enoyl-CoA hydratase [PUCCINIA graminis f. sp. tritici CRL 75-36-700-3] >gi|309306846|gb|EFP83437.1| enoyl-CoA hydratase [PUCCINIA graminis f. sp. tritici CRL 75-36-700-3]	XP_003327856	1.49977e-14
21228	0	5	0.350129	1	ergosterol biosynthesis ERG4/ERG24 family protein [PUCCINIA graminis f. sp. tritici CRL 75-36-700-3]	XP_003324242	2.82573e-12
26709	0	3	0.530267	1	ESS1 protein [PUCCINIA graminis f. sp. tritici CRL 75-36-700-3] >gi|309316556|gb|EFP93147.1| peptidyl-prolyl cis-trans isomerase NIMA-interacting 1 [PUCCINIA graminis f. sp. tritici CRL 75-36-700-3]	XP_003337566	3.12908e-15
20433	0	13	0.0683089	1	eukaryotic translation initiation factor 1A [PUCCINIA graminis f. sp. tritici CRL 75-36-700-3] >gi|331251562|ref|XP_003338375.1| eukaryotic translation initiation factor 1A [PUCCINIA graminis f. sp. tritici CRL 75-36-700-3] >gi|309308572|gb|EFP85163.1| eukaryotic translation initiation factor 1A, X-chromosomal [PUCCINIA graminis f. sp. tritici CRL 75-36-700-3] >gi|309317365|gb|EFP93956.1| eukaryo…	XP_003329582	7.934e-53
22759	0	3	0.530267	1	eukaryotic translation initiation factor 2 subunit alpha [PUCCINIA graminis f. sp. tritici CRL 75-36-700-3]	XP_003332445	2.83375e-47
22494	0	7	0.232934	1	eukaryotic translation initiation factor 3 subunit 6 [PUCCINIA graminis f. sp. tritici CRL 75-36-700-3]	XP_003330040	2.21258e-32
20719	0	5	0.350129	1	eukaryotic translation initiation factor 3 subunit 9 [Melam larici-populina 98AG31]	EGG05783	1.00701e-13
21178	0	7	0.232934	1	eukaryotic translation initiation factor 5 [PUCCINIA graminis f. sp. tritici CRL 75-36-700-3] >gi|309310668|gb|EFP87259.1| translation initiation factor eIF-5 [PUCCINIA graminis f. sp. tritici CRL 75-36-700-3]	XP_003331678	8.04824e-16
23764	0	2	0.66493	1	extracellular serine carboxypeptidase [Melam larici-populina 98AG31]	EGG03405	1.75006e-30
21054	0	9	0.15612	1	F0-ATPase delta subunit [PUCCINIA graminis f. sp. tritici CRL 75-36-700-3] >gi|309309576|gb|EFP86167.1| F-type H+-transporting ATPase oligomycin sensitivity conferral protein [PUCCINIA graminis f. sp. tritici CRL 75-36-700-3]	XP_003330586	3.27718e-66
23935	0	2	0.66493	1	F-actin-capping protein subunit beta [PUCCINIA graminis f. sp. tritici CRL 75-36-700-3] >gi|309300631|gb|EFP77222.1| capping protein (actin filament) muscle Z-line, beta [PUCCINIA graminis f. sp. tritici CRL 75-36-700-3]	XP_003321641	0.0448566
24282	0	2	0.66493	1	family 13 glycoside hydrolase [Melam larici-populina 98AG31]	EGG10518	4.388e-26
20466	0	11	0.102862	1	family 2 glycoside hydrolase [Melam larici-populina 98AG31]	EGG04268	0.00014423
25462	0	5	0.350129	1	family 2 glycosyltransferase [Melam larici-populina 98AG31]	EGF99634	4.63358e-25
26064	0	2	0.66493	1	family 2 glycosyltransferase [Melam larici-populina 98AG31]	EGG07707	1.54997e-15
25546	0	3	0.530267	1	family 2 glycosyltransferase [Melam larici-populina 98AG31]	EGG09109	3.7563e-35
24564	0	2	0.66493	1	family 28 glycoside hydrolase [Melam larici-populina 98AG31]	EGG12884	0.000492781
25417	0	2	0.66493	1	family 32 glycoside hydrolase [Melam larici-populina 98AG31]	EGG04554	2.05053e-06
22111	0	9	0.15612	1	family 66 glycosyltransferase [Melam larici-populina 98AG31]	EGG12308	2.27076e-30
24425	0	7	0.232934	1	family 71 glycosyltransferase [Melam larici-populina 98AG31]	EGF99333	3.06895e-06
26132	0	2	0.66493	1	ferrochelatase [PUCCINIA graminis f. sp. tritici CRL 75-36-700-3] >gi|309306168|gb|EFP82759.1| ferrochelatase [PUCCINIA graminis f. sp. tritici CRL 75-36-700-3]	XP_003327178	1.57644e-23
22213	0	2	0.66493	1	FK506-binding protein [PUCCINIA graminis f. sp. tritici CRL 75-36-700-3] >gi|309306584|gb|EFP83175.1| peptidylprolyl isomerase [PUCCINIA graminis f. sp. tritici CRL 75-36-700-3]	XP_003327594	1.81216e-26
24725	0	4	0.430439	1	galactose-1-phosphate uridylyltransferase [PUCCINIA graminis f. sp. tritici CRL 75-36-700-3]	EFP85711	1.59937e-52
25482	0	3	0.530267	1	gamma-adaptin [PUCCINIA graminis f. sp. tritici CRL 75-36-700-3] >gi|309314459|gb|EFP91050.1| AP-1 complex subunit gamma-1 [PUCCINIA graminis f. sp. tritici CRL 75-36-700-3]	XP_003335469	2.82913e-39
26801	0	2	0.66493	1	geranylgeranyl pyrophosphate synthetase [PUCCINIA graminis f. sp. tritici CRL 75-36-700-3]	XP_003338205	1.50044e-17
21321	0	3	0.530267	1	glucose transporter [PUCCINIA graminis f. sp. tritici CRL 75-36-700-3] >gi|309301450|gb|EFP78041.1| HYPOTHETICAL protein PGTG_03997 [PUCCINIA graminis f. sp. tritici CRL 75-36-700-3]	XP_003322460	8.01542e-10
21563	0	1	1	1	glucose transporter [PUCCINIA graminis f. sp. tritici CRL 75-36-700-3] >gi|309301450|gb|EFP78041.1| HYPOTHETICAL protein PGTG_03997 [PUCCINIA graminis f. sp. tritici CRL 75-36-700-3]	XP_003322460	4.61957e-05
24406	0	2	0.66493	1	glutamyl-tRNA synthetase [PUCCINIA graminis f. sp. tritici CRL 75-36-700-3]	EFP91469	4.81808e-23
23544	0	13	0.0683089	1	glutaredoxin-1 [Schizosaccharomyces japonicus yFS275] >gi|212000589|gb|EEB06249.1| glutaredoxin-1 [Schizosaccharomyces japonicus yFS275]	XP_002172542	1.26167e-27
22252	0	5	0.350129	1	glutaryl-CoA dehydrogenase [PUCCINIA graminis f. sp. tritici CRL 75-36-700-3] >gi|309309732|gb|EFP86323.1| glutaryl-CoA dehydrogenase, mitochondrial [PUCCINIA graminis f. sp. tritici CRL 75-36-700-3]	XP_003330742	2.34754e-56
21275	0	6	0.285179	1	glycyl-tRNA synthetase [PUCCINIA graminis f. sp. tritici CRL 75-36-700-3]	EFP81005	2.647e-48
4508	0	4	0.430439	1	GPI ethanolamine phosphate transferase 2 [PUCCINIA graminis f. sp. tritici CRL 75-36-700-3]	XP_003322129	5.17253e-07
24605	0	4	0.430439	1	GPI mannosyltransferase 2 [PUCCINIA graminis f. sp. tritici CRL 75-36-700-3] >gi|309307112|gb|EFP83703.1| HYPOTHETICAL protein PGTG_09416 [PUCCINIA graminis f. sp. tritici CRL 75-36-700-3]	XP_003328122	1.57059e-07
21355	0	2	0.66493	1	GTP-binding protein ypt1 [PUCCINIA graminis f. sp. tritici CRL 75-36-700-3] >gi|309303583|gb|EFP80174.1| GTP-binding protein ypt1 [PUCCINIA graminis f. sp. tritici CRL 75-36-700-3]	XP_003324593	6.1111e-19
24638	0	2	0.66493	1	GTP-binding protein YPT52 [PUCCINIA graminis f. sp. tritici CRL 75-36-700-3]	XP_003322028	3.4269e-05
20386	0	4	0.430439	1	GTP-binding protein yptV1 [PUCCINIA graminis f. sp. tritici CRL 75-36-700-3]	XP_003324018	4.60665e-19
25593	0	6	0.285179	1	HAL protein kinase [PUCCINIA graminis f. sp. tritici CRL 75-36-700-3] >gi|309308358|gb|EFP84949.1| HAL protein kinase [PUCCINIA graminis f. sp. tritici CRL 75-36-700-3]	XP_003329368	1.83969e-19
21402	0	4	0.430439	1	heat shock protein 60 [PUCCINIA graminis f. sp. tritici CRL 75-36-700-3]	XP_003334205	1.8659e-42
21212	0	14	0.0560289	1	hesp-767 [Melam lini] >gi|328861277|gb|EGG10381.1| HYPOTHETICAL protein MELLADRAFT_42266 [Melam larici-populina 98AG31]	ABB96277	7.59847e-39
21157	0	5	0.350129	1	het-c2 protein [PUCCINIA graminis f. sp. tritici CRL 75-36-700-3] >gi|309310156|gb|EFP86747.1| HYPOTHETICAL protein PGTG_13129 [PUCCINIA graminis f. sp. tritici CRL 75-36-700-3]	XP_003331166	2.76272e-24
22692	0	3	0.530267	1	high-affinity glucose transporter RGT2 [PUCCINIA graminis f. sp. tritici CRL 75-36-700-3]	XP_003333363	1.40814e-14
24786	0	5	0.350129	1	histidinolphosphatase [PUCCINIA graminis f. sp. tritici CRL 75-36-700-3] >gi|309314327|gb|EFP90918.1| HYPOTHETICAL protein PGTG_17190 [PUCCINIA graminis f. sp. tritici CRL 75-36-700-3]	XP_003335337	2.89154e-26
21433	0	10	0.126722	1	histone H2B [PUCCINIA graminis f. sp. tritici CRL 75-36-700-3] >gi|309299379|gb|EFP75970.1| histone H2B [PUCCINIA graminis f. sp. tritici CRL 75-36-700-3]	XP_003320389	3.37128e-54
21861	0	11	0.102862	1	histone H2B.3 [PUCCINIA graminis f. sp. tritici CRL 75-36-700-3] >gi|309306128|gb|EFP82719.1| histone H2B [PUCCINIA graminis f. sp. tritici CRL 75-36-700-3]	XP_003327138	3.21575e-31
21704	0	2	0.66493	1	histone-binding protein RBBP4 [PUCCINIA graminis f. sp. tritici CRL 75-36-700-3]	EFP74361	3.1349e-43
19927	0	1	1	1	hsp10-like protein [PUCCINIA graminis f. sp. tritici CRL 75-36-700-3] >gi|309313194|gb|EFP89785.1| chaperonin GroS [PUCCINIA graminis f. sp. tritici CRL 75-36-700-3]	XP_003334204	2.10058e-37
22377	0	1	1	1	hydroxyacyl-coenzyme A dehydrogenase [PUCCINIA graminis f. sp. tritici CRL 75-36-700-3]	XP_003335369	4.73766e-33
24041	0	3	0.530267	1	HYPOTHETICAL class III chitin synthase [PUCCINIA graminis f. sp. tritici]	ABB70408	1.23263e-18
23616	0	7	0.232934	1	HYPOTHETICAL protein [Podospora anserina S mat+] >gi|170944728|emb|CAP70839.1| unnamed protein product [Podospora anserina S mat+]	XP_001909706	2.00323e-09
20511	0	5	0.350129	1	HYPOTHETICAL protein E5Q_00268 [Mixia osmundae IAM 14324]	GAA93624	1.29973e-12
23663	0	2	0.66493	1	HYPOTHETICAL protein E5Q_00539 [Mixia osmundae IAM 14324]	GAA93893	0.0462626
20907	0	4	0.430439	1	HYPOTHETICAL protein E5Q_01801 [Mixia osmundae IAM 14324]	GAA95146	1.77608e-31
21583	0	11	0.102862	1	HYPOTHETICAL protein E5Q_03049 [Mixia osmundae IAM 14324]	GAA96382	5.93547e-14
21380	0	7	0.232934	1	HYPOTHETICAL protein E5Q_03614 [Mixia osmundae IAM 14324]	GAA96940	1.2633e-19
25200	0	12	0.0835669	1	HYPOTHETICAL protein E5Q_04235 [Mixia osmundae IAM 14324]	GAA97557	1.1093e-08
25199	0	2	0.66493	1	HYPOTHETICAL protein E5Q_04236 [Mixia osmundae IAM 14324]	GAA97558	2.18621e-05
25298	0	1	1	1	HYPOTHETICAL protein E5Q_06054 [Mixia osmundae IAM 14324]	GAA99359	4.80724e-27
26695	0	3	0.530267	1	HYPOTHETICAL protein E5Q_06759 [Mixia osmundae IAM 14324]	GAB00057	3.21315e-17
26263	0	2	0.66493	1	HYPOTHETICAL protein MELLADRAFT_101435 [Melam larici-populina 98AG31]	EGG12851	3.35868e-17
26627	0	5	0.350129	1	HYPOTHETICAL protein MELLADRAFT_102166 [Melam larici-populina 98AG31]	EGG11799	4.66635e-06
21310	0	7	0.232934	1	HYPOTHETICAL protein MELLADRAFT_102236 [Melam larici-populina 98AG31]	EGG11342	4.07186e-07
21470	0	7	0.232934	1	HYPOTHETICAL protein MELLADRAFT_103058 [Melam larici-populina 98AG31]	EGG10466	2.97359e-15
22255	0	9	0.15612	1	HYPOTHETICAL protein MELLADRAFT_103088 [Melam larici-populina 98AG31]	EGG10775	61.3623
21935	0	14	0.0560289	1	HYPOTHETICAL protein MELLADRAFT_103404 [Melam larici-populina 98AG31]	EGG10062	1.72543e-29
18741	0	10	0.126722	1	HYPOTHETICAL protein MELLADRAFT_103715 [Melam larici-populina 98AG31]	EGG09675	1.79613e-80
22927	0	8	0.191526	1	HYPOTHETICAL protein MELLADRAFT_103975 [Melam larici-populina 98AG31]	EGG09849	3.88173e-17
24263	0	3	0.530267	1	HYPOTHETICAL protein MELLADRAFT_104473 [Melam larici-populina 98AG31]	EGG09162	1.19166e-12
24270	0	9	0.15612	1	HYPOTHETICAL protein MELLADRAFT_104798 [Melam larici-populina 98AG31]	EGG08715	2.13354e-18
21265	0	5	0.350129	1	HYPOTHETICAL protein MELLADRAFT_104974 [Melam larici-populina 98AG31]	EGG08611	1.95833e-55
21577	0	5	0.350129	1	HYPOTHETICAL protein MELLADRAFT_105730 [Melam larici-populina 98AG31]	EGG07704	3.14568e-15
21416	0	4	0.430439	1	HYPOTHETICAL protein MELLADRAFT_106478 [Melam larici-populina 98AG31]	EGG06559	4.52746e-10
21493	0	11	0.102862	1	HYPOTHETICAL protein MELLADRAFT_106535 [Melam larici-populina 98AG31]	EGG06698	3.30562e-31
22755	0	2	0.66493	1	HYPOTHETICAL protein MELLADRAFT_107911 [Melam larici-populina 98AG31]	EGG05055	1.72386e-15
21952	0	4	0.430439	1	HYPOTHETICAL protein MELLADRAFT_108410 [Melam larici-populina 98AG31]	EGG04512	36.5177
23754	0	10	0.126722	1	HYPOTHETICAL protein MELLADRAFT_108689 [Melam larici-populina 98AG31]	EGG04187	8.39147e-10
6657	0	7	0.232934	1	HYPOTHETICAL protein MELLADRAFT_109581 [Melam larici-populina 98AG31]	EGG03141	4.84565e-18
23520	0	2	0.66493	1	HYPOTHETICAL protein MELLADRAFT_110844 [Melam larici-populina 98AG31]	EGG01625	2.13308e-14
23300	0	8	0.191526	1	HYPOTHETICAL protein MELLADRAFT_111078 [Melam larici-populina 98AG31]	EGG01276	2.56255e-21
26561	0	5	0.350129	1	HYPOTHETICAL protein MELLADRAFT_111235 [Melam larici-populina 98AG31]	EGG01206	0.705706
22182	0	2	0.66493	1	HYPOTHETICAL protein MELLADRAFT_111284 [Melam larici-populina 98AG31]	EGG01028	1.08564e-19
22489	0	1	1	1	HYPOTHETICAL protein MELLADRAFT_111285 [Melam larici-populina 98AG31]	EGG01104	4.94705e-10
21850	0	2	0.66493	1	HYPOTHETICAL protein MELLADRAFT_112310 [Melam larici-populina 98AG31]	EGF99914	6.15333e-10
23179	0	2	0.66493	1	HYPOTHETICAL protein MELLADRAFT_112391 [Melam larici-populina 98AG31]	EGF99823	3.63392e-18
24590	0	3	0.530267	1	HYPOTHETICAL protein MELLADRAFT_113406 [Melam larici-populina 98AG31]	EGF98609	3.61208e-15
22442	0	2	0.66493	1	HYPOTHETICAL protein MELLADRAFT_113802 [Melam larici-populina 98AG31]	EGF98141	5.81739e-09
24706	0	3	0.530267	1	HYPOTHETICAL protein MELLADRAFT_114786 [Melam larici-populina 98AG31]	EGG12566	5.26997e-19
22397	0	3	0.530267	1	HYPOTHETICAL protein MELLADRAFT_115097 [Melam larici-populina 98AG31]	EGG12005	2.15729e-34
25794	0	3	0.530267	1	HYPOTHETICAL protein MELLADRAFT_115192 [Melam larici-populina 98AG31]	EGG11776	7.25213e-52
5972	0	6	0.285179	1	HYPOTHETICAL protein MELLADRAFT_115344 [Melam larici-populina 98AG31]	EGG10938	2.64413e-36
25186	0	2	0.66493	1	HYPOTHETICAL protein MELLADRAFT_115382 [Melam larici-populina 98AG31]	EGG11100	36.1153
24509	0	2	0.66493	1	HYPOTHETICAL protein MELLADRAFT_115776 [Melam larici-populina 98AG31]	EGG09515	3.8017e-07
26450	0	2	0.66493	1	HYPOTHETICAL protein MELLADRAFT_115804 [Melam larici-populina 98AG31]	EGG09288	1.69534e-13
23944	0	2	0.66493	1	HYPOTHETICAL protein MELLADRAFT_115837 [Melam larici-populina 98AG31]	EGG09242	1.04363e-18
26700	0	2	0.66493	1	HYPOTHETICAL protein MELLADRAFT_115877 [Melam larici-populina 98AG31]	EGG08781	11.5004
22636	0	4	0.430439	1	HYPOTHETICAL protein MELLADRAFT_116020 [Melam larici-populina 98AG31]	EGG08589	5.00741e-08
23394	0	2	0.66493	1	HYPOTHETICAL protein MELLADRAFT_116322 [Melam larici-populina 98AG31]	EGG07390	2.27625e-31
21006	0	4	0.430439	1	HYPOTHETICAL protein MELLADRAFT_116368 [Melam larici-populina 98AG31]	EGG07180	1.30973e-34
26573	0	3	0.530267	1	HYPOTHETICAL protein MELLADRAFT_116454 [Melam larici-populina 98AG31]	EGG06751	6.02342e-33
24667	0	3	0.530267	1	HYPOTHETICAL protein MELLADRAFT_116696 [Melam larici-populina 98AG31]	EGG05763	4.25413e-30
22339	0	3	0.530267	1	HYPOTHETICAL protein MELLADRAFT_116882 [Melam larici-populina 98AG31]	EGG05122	1.95805e-16
23566	0	3	0.530267	1	HYPOTHETICAL protein MELLADRAFT_116911 [Melam larici-populina 98AG31]	EGG05176	6.0978e-27
21855	0	7	0.232934	1	HYPOTHETICAL protein MELLADRAFT_117078 [Melam larici-populina 98AG31]	EGG04495	8.34842e-24
23588	0	2	0.66493	1	HYPOTHETICAL protein MELLADRAFT_117244 [Melam larici-populina 98AG31]	EGG03794	2.17354e-07
22292	0	8	0.191526	1	HYPOTHETICAL protein MELLADRAFT_117275 [Melam larici-populina 98AG31]	EGG03594	0.0267527
22775	0	5	0.350129	1	HYPOTHETICAL protein MELLADRAFT_117357 [Melam larici-populina 98AG31]	EGG03343	2.61792e-27
21944	0	6	0.285179	1	HYPOTHETICAL protein MELLADRAFT_117484 [Melam larici-populina 98AG31]	EGG02783	4.07313e-07
23670	0	1	1	1	HYPOTHETICAL protein MELLADRAFT_117708 [Melam larici-populina 98AG31]	EGG01843	1.23405e-30
20452	0	3	0.530267	1	HYPOTHETICAL protein MELLADRAFT_118026 [Melam larici-populina 98AG31]	EGG00401	1.95932e-16
21206	0	3	0.530267	1	HYPOTHETICAL protein MELLADRAFT_118325 [Melam larici-populina 98AG31]	EGF99308	7.66163e-07
26652	0	2	0.66493	1	HYPOTHETICAL protein MELLADRAFT_123251 [Melam larici-populina 98AG31] >gi|328861665|gb|EGG10768.1| HYPOTHETICAL protein MELLADRAFT_123250 [Melam larici-populina 98AG31]	EGF97597	1.88191e-52
22183	0	8	0.191526	1	HYPOTHETICAL protein MELLADRAFT_123912 [Melam larici-populina 98AG31]	EGG11487	1.24316e-12
23296	0	8	0.191526	1	HYPOTHETICAL protein MELLADRAFT_124323 [Melam larici-populina 98AG31]	EGG11111	0.000479691
22559	0	12	0.0835669	1	HYPOTHETICAL protein MELLADRAFT_26032 [Melam larici-populina 98AG31]	EGG04896	1.68308e-28
21035	0	2	0.66493	1	HYPOTHETICAL protein MELLADRAFT_28883 [Melam larici-populina 98AG31]	EGG06598	0.0125471
23952	0	1	1	1	HYPOTHETICAL protein MELLADRAFT_32625 [Melam larici-populina 98AG31]	EGG12711	6.75136e-15
23953	0	1	1	1	HYPOTHETICAL protein MELLADRAFT_32625 [Melam larici-populina 98AG31]	EGG12711	3.66464e-30
20642	0	2	0.66493	1	HYPOTHETICAL protein MELLADRAFT_32752 [Melam larici-populina 98AG31]	EGG11964	5.12987e-05
24071	0	4	0.430439	1	HYPOTHETICAL protein MELLADRAFT_33387 [Melam larici-populina 98AG31]	EGG10890	4.21986e-39
20781	0	11	0.102862	1	HYPOTHETICAL protein MELLADRAFT_33765 [Melam larici-populina 98AG31]	EGG10764	1.25074e-28
23741	0	4	0.430439	1	HYPOTHETICAL protein MELLADRAFT_34152 [Melam larici-populina 98AG31]	EGG09671	2.01297e-25
21902	0	4	0.430439	1	HYPOTHETICAL protein MELLADRAFT_34269 [Melam larici-populina 98AG31]	EGG09837	4.65554e-08
23789	0	4	0.430439	1	HYPOTHETICAL protein MELLADRAFT_34386 [Melam larici-populina 98AG31]	EGG09502	0.129048
26424	0	3	0.530267	1	HYPOTHETICAL protein MELLADRAFT_34393 [Melam larici-populina 98AG31]	EGG09424	5.31688e-25
21325	0	5	0.350129	1	HYPOTHETICAL protein MELLADRAFT_34668 [Melam larici-populina 98AG31]	EGG08899	1.59022e-23
21167	0	4	0.430439	1	HYPOTHETICAL protein MELLADRAFT_34686 [Melam larici-populina 98AG31]	EGG08971	0.392924
25942	0	2	0.66493	1	HYPOTHETICAL protein MELLADRAFT_34761 [Melam larici-populina 98AG31]	EGG08879	0.0353987
9113	0	4	0.430439	1	HYPOTHETICAL protein MELLADRAFT_34801 [Melam larici-populina 98AG31]	EGG08882	5.36904
23303	0	7	0.232934	1	HYPOTHETICAL protein MELLADRAFT_34968 [Melam larici-populina 98AG31]	EGG08425	3.8746e-27
13711	0	3	0.530267	1	HYPOTHETICAL protein MELLADRAFT_35076 [Melam larici-populina 98AG31]	EGG08152	1.96442e-29
21568	0	2	0.66493	1	HYPOTHETICAL protein MELLADRAFT_35173 [Melam larici-populina 98AG31]	EGG08061	1.07728e-16
26457	0	1	1	1	HYPOTHETICAL protein MELLADRAFT_35323 [Melam larici-populina 98AG31]	EGG07713	0.00223492
22959	0	2	0.66493	1	HYPOTHETICAL protein MELLADRAFT_35374 [Melam larici-populina 98AG31]	EGG07657	2.29813e-10
21756	0	8	0.191526	1	HYPOTHETICAL protein MELLADRAFT_35827 [Melam larici-populina 98AG31]	EGG06816	1.60399e-21
21758	0	2	0.66493	1	HYPOTHETICAL protein MELLADRAFT_35827 [Melam larici-populina 98AG31]	EGG06816	3.6927e-19
25329	0	2	0.66493	1	HYPOTHETICAL protein MELLADRAFT_35874 [Melam larici-populina 98AG31]	EGG06796	4.44001e-05
21242	0	5	0.350129	1	HYPOTHETICAL protein MELLADRAFT_35938 [Melam larici-populina 98AG31]	EGG06960	2.58303e-34
21592	0	8	0.191526	1	HYPOTHETICAL protein MELLADRAFT_35945 [Melam larici-populina 98AG31]	EGG06755	3.86407e-45
21394	0	4	0.430439	1	HYPOTHETICAL protein MELLADRAFT_36777 [Melam larici-populina 98AG31]	EGG05456	1.14448e-32
24814	0	2	0.66493	1	HYPOTHETICAL protein MELLADRAFT_36888 [Melam larici-populina 98AG31]	EGG05254	6.29552e-21
23849	0	8	0.191526	1	HYPOTHETICAL protein MELLADRAFT_37191 [Melam larici-populina 98AG31]	EGG04872	6.73374e-08
26187	0	5	0.350129	1	HYPOTHETICAL protein MELLADRAFT_37591 [Melam larici-populina 98AG31]	EGG04155	8.30349e-18
21099	0	8	0.191526	1	HYPOTHETICAL protein MELLADRAFT_37606 [Melam larici-populina 98AG31] >gi|328859781|gb|EGG08889.1| HYPOTHETICAL protein MELLADRAFT_61640 [Melam larici-populina 98AG31]	EGG04082	1.16395e-08
22092	0	3	0.530267	1	HYPOTHETICAL protein MELLADRAFT_37606 [Melam larici-populina 98AG31] >gi|328859781|gb|EGG08889.1| HYPOTHETICAL protein MELLADRAFT_61640 [Melam larici-populina 98AG31]	EGG04082	6.54397e-38
24734	0	6	0.285179	1	HYPOTHETICAL protein MELLADRAFT_37606 [Melam larici-populina 98AG31] >gi|328859781|gb|EGG08889.1| HYPOTHETICAL protein MELLADRAFT_61640 [Melam larici-populina 98AG31]	EGG04082	4.60811e-10
26656	0	2	0.66493	1	HYPOTHETICAL protein MELLADRAFT_37633 [Melam larici-populina 98AG31]	EGG04183	3.10689e-36
21662	0	3	0.530267	1	HYPOTHETICAL protein MELLADRAFT_37823 [Melam larici-populina 98AG31]	EGG03883	3.21342e-32
22468	0	3	0.530267	1	HYPOTHETICAL protein MELLADRAFT_37906 [Melam larici-populina 98AG31]	EGG03698	0.0003464
22040	0	10	0.126722	1	HYPOTHETICAL protein MELLADRAFT_37995 [Melam larici-populina 98AG31]	EGG03465	8.26997e-39
23671	0	2	0.66493	1	HYPOTHETICAL protein MELLADRAFT_38203 [Melam larici-populina 98AG31]	EGG03071	6.06924e-21
23310	0	4	0.430439	1	HYPOTHETICAL protein MELLADRAFT_38559 [Melam larici-populina 98AG31]	EGG02514	1.60122e-61
25607	0	4	0.430439	1	HYPOTHETICAL protein MELLADRAFT_38743 [Melam larici-populina 98AG31]	EGG02111	1.71913e-50
21898	0	6	0.285179	1	HYPOTHETICAL protein MELLADRAFT_38954 [Melam larici-populina 98AG31]	EGG01781	2.65872e-13
24711	0	4	0.430439	1	HYPOTHETICAL protein MELLADRAFT_38961 [Melam larici-populina 98AG31]	EGG01821	1.89385e-31
26934	0	2	0.66493	1	HYPOTHETICAL protein MELLADRAFT_38989 [Melam larici-populina 98AG31]	EGG01700	2.78737e-20
25899	0	3	0.530267	1	HYPOTHETICAL protein MELLADRAFT_39696 [Melam larici-populina 98AG31]	EGG00400	7.38051e-32
26350	0	4	0.430439	1	HYPOTHETICAL protein MELLADRAFT_40132 [Melam larici-populina 98AG31]	EGF99699	1.22899e-16
23183	0	5	0.350129	1	HYPOTHETICAL protein MELLADRAFT_40285 [Melam larici-populina 98AG31]	EGF99418	9.4777e-26
21708	0	3	0.530267	1	HYPOTHETICAL protein MELLADRAFT_40316 [Melam larici-populina 98AG31]	EGF99354	9.82001e-10
24791	0	4	0.430439	1	HYPOTHETICAL protein MELLADRAFT_40741 [Melam larici-populina 98AG31]	EGF98658	7.26536e-18
24729	0	2	0.66493	1	HYPOTHETICAL protein MELLADRAFT_41199 [Melam larici-populina 98AG31]	EGF97654	1.25081e-20
23180	0	3	0.530267	1	HYPOTHETICAL protein MELLADRAFT_41235 [Melam larici-populina 98AG31] >gi|328856430|gb|EGG05551.1| HYPOTHETICAL protein MELLADRAFT_36650 [Melam larici-populina 98AG31]	EGF97522	7.5829e-27
22843	0	1	1	1	HYPOTHETICAL protein MELLADRAFT_41264 [Melam larici-populina 98AG31]	EGF97386	2.49365e-15
23382	0	5	0.350129	1	HYPOTHETICAL protein MELLADRAFT_41471 [Melam larici-populina 98AG31]	EGG13115	3.09879e-34
26273	0	7	0.232934	1	HYPOTHETICAL protein MELLADRAFT_41476 [Melam larici-populina 98AG31]	EGG13113	2.19761e-17
24811	0	5	0.350129	1	HYPOTHETICAL protein MELLADRAFT_41669 [Melam larici-populina 98AG31]	EGG12412	7.16997e-83
25943	0	2	0.66493	1	HYPOTHETICAL protein MELLADRAFT_41749 [Melam larici-populina 98AG31]	EGG12290	1.84247e-05
21237	0	7	0.232934	1	HYPOTHETICAL protein MELLADRAFT_41776 [Melam larici-populina 98AG31]	EGG12067	2.78251e-23
23406	0	6	0.285179	1	HYPOTHETICAL protein MELLADRAFT_41910 [Melam larici-populina 98AG31]	EGG11432	4.51725e-26
24751	0	4	0.430439	1	HYPOTHETICAL protein MELLADRAFT_43008 [Melam larici-populina 98AG31]	EGG07903	9.18078e-26
23336	0	3	0.530267	1	HYPOTHETICAL protein MELLADRAFT_43111 [Melam larici-populina 98AG31]	EGG07730	5.93953e-25
22416	0	14	0.0560289	1	HYPOTHETICAL protein MELLADRAFT_43398 [Melam larici-populina 98AG31]	EGG06914	3.95113e-55
26359	0	2	0.66493	1	HYPOTHETICAL protein MELLADRAFT_43398 [Melam larici-populina 98AG31]	EGG06914	1.78306e-25
21981	0	3	0.530267	1	HYPOTHETICAL protein MELLADRAFT_43449 [Melam larici-populina 98AG31]	EGG06690	6.30471e-21
25029	0	2	0.66493	1	HYPOTHETICAL protein MELLADRAFT_43454 [Melam larici-populina 98AG31]	EGG06625	3.62176e-18
22963	0	4	0.430439	1	HYPOTHETICAL protein MELLADRAFT_43532 [Melam larici-populina 98AG31]	EGG06437	2.11874e-11
24625	0	5	0.350129	1	HYPOTHETICAL protein MELLADRAFT_43549 [Melam larici-populina 98AG31]	EGG06329	3.66697e-21
23091	0	5	0.350129	1	HYPOTHETICAL protein MELLADRAFT_43988 [Melam larici-populina 98AG31]	EGG05190	2.5499e-50
22321	0	1	1	1	HYPOTHETICAL protein MELLADRAFT_44036 [Melam larici-populina 98AG31]	EGG04956	8.11142e-29
23167	0	7	0.232934	1	HYPOTHETICAL protein MELLADRAFT_44058 [Melam larici-populina 98AG31]	EGG04738	1.80508e-38
21400	0	2	0.66493	1	HYPOTHETICAL protein MELLADRAFT_44122 [Melam larici-populina 98AG31]	EGG04701	1.31038e-09
22436	0	3	0.530267	1	HYPOTHETICAL protein MELLADRAFT_44219 [Melam larici-populina 98AG31]	EGG04433	4.2335e-19
20998	0	4	0.430439	1	HYPOTHETICAL protein MELLADRAFT_44358 [Melam larici-populina 98AG31]	EGG04021	3.72413e-08
22683	0	10	0.126722	1	HYPOTHETICAL protein MELLADRAFT_44401 [Melam larici-populina 98AG31]	EGG03731	1.45516e-44
22642	0	7	0.232934	1	HYPOTHETICAL protein MELLADRAFT_44407 [Melam larici-populina 98AG31]	EGG03734	6.05327e-99
26354	0	2	0.66493	1	HYPOTHETICAL protein MELLADRAFT_44425 [Melam larici-populina 98AG31]	EGG03758	9.30048e-09
25363	0	6	0.285179	1	HYPOTHETICAL protein MELLADRAFT_44676 [Melam larici-populina 98AG31]	EGG03153	2.37511e-10
25680	0	3	0.530267	1	HYPOTHETICAL protein MELLADRAFT_44719 [Melam larici-populina 98AG31]	EGG02928	1.01456e-20
20180	0	4	0.430439	1	HYPOTHETICAL protein MELLADRAFT_44749 [Melam larici-populina 98AG31]	EGG02967	8.11547e-22
26919	0	2	0.66493	1	HYPOTHETICAL protein MELLADRAFT_44926 [Melam larici-populina 98AG31]	EGG02040	9.70558e-23
21112	0	2	0.66493	1	HYPOTHETICAL protein MELLADRAFT_44965 [Melam larici-populina 98AG31]	EGG01889	1.42592e-42
26680	0	2	0.66493	1	HYPOTHETICAL protein MELLADRAFT_45062 [Melam larici-populina 98AG31]	EGG01727	8.41534e-39
21823	0	4	0.430439	1	HYPOTHETICAL protein MELLADRAFT_45092 [Melam larici-populina 98AG31]	EGG01599	1.45927e-56
21396	0	6	0.285179	1	HYPOTHETICAL protein MELLADRAFT_45116 [Melam larici-populina 98AG31]	EGG01495	17.6326
23469	0	2	0.66493	1	HYPOTHETICAL protein MELLADRAFT_45347 [Melam larici-populina 98AG31]	EGG00693	5.32496e-24
21062	0	5	0.350129	1	HYPOTHETICAL protein MELLADRAFT_45441 [Melam larici-populina 98AG31]	EGG00447	3.28225e-72
22606	0	5	0.350129	1	HYPOTHETICAL protein MELLADRAFT_45576 [Melam larici-populina 98AG31]	EGG00076	6.07963e-66
21165	0	10	0.126722	1	HYPOTHETICAL protein MELLADRAFT_45703 [Melam larici-populina 98AG31]	EGF99549	8.36308e-33
26143	0	2	0.66493	1	HYPOTHETICAL protein MELLADRAFT_45741 [Melam larici-populina 98AG31]	EGF99440	1.00507e-14
25147	0	2	0.66493	1	HYPOTHETICAL protein MELLADRAFT_45782 [Melam larici-populina 98AG31]	EGF99241	5.34481e-05
23461	0	7	0.232934	1	HYPOTHETICAL protein MELLADRAFT_45876 [Melam larici-populina 98AG31]	EGF98884	6.77055e-42
26335	0	5	0.350129	1	HYPOTHETICAL protein MELLADRAFT_45958 [Melam larici-populina 98AG31]	EGF98722	0.124512
25798	0	3	0.530267	1	HYPOTHETICAL protein MELLADRAFT_45973 [Melam larici-populina 98AG31]	EGF98676	0.0634668
22598	0	5	0.350129	1	HYPOTHETICAL protein MELLADRAFT_46038 [Melam larici-populina 98AG31]	EGF98485	4.35747e-31
12577	0	4	0.430439	1	HYPOTHETICAL protein MELLADRAFT_46330 [Melam larici-populina 98AG31]	EGG13151	1.58353e-17
20846	0	3	0.530267	1	HYPOTHETICAL protein MELLADRAFT_46948 [Melam larici-populina 98AG31]	EGG11162	1.77993e-12
20840	0	4	0.430439	1	HYPOTHETICAL protein MELLADRAFT_47114 [Melam larici-populina 98AG31]	EGG10662	5.13929e-28
20721	0	6	0.285179	1	HYPOTHETICAL protein MELLADRAFT_47344 [Melam larici-populina 98AG31]	EGG09740	2.97274e-77
26788	0	2	0.66493	1	HYPOTHETICAL protein MELLADRAFT_47694 [Melam larici-populina 98AG31]	EGG08875	2.11873e-22
21455	0	2	0.66493	1	HYPOTHETICAL protein MELLADRAFT_47739 [Melam larici-populina 98AG31]	EGG08478	1.94634e-12
25862	0	3	0.530267	1	HYPOTHETICAL protein MELLADRAFT_47782 [Melam larici-populina 98AG31]	EGG08559	9.8136e-36
21623	0	7	0.232934	1	HYPOTHETICAL protein MELLADRAFT_48093 [Melam larici-populina 98AG31]	EGG07336	8.79051e-42
24860	0	4	0.430439	1	HYPOTHETICAL protein MELLADRAFT_48126 [Melam larici-populina 98AG31]	EGG07431	4.52207e-35
23315	0	6	0.285179	1	HYPOTHETICAL protein MELLADRAFT_48667 [Melam larici-populina 98AG31]	EGG05880	4.21322e-56
22361	0	3	0.530267	1	HYPOTHETICAL protein MELLADRAFT_48743 [Melam larici-populina 98AG31]	EGG05607	4.95255e-45
24576	0	9	0.15612	1	HYPOTHETICAL protein MELLADRAFT_48766 [Melam larici-populina 98AG31]	EGG05644	4.60987e-70
17503	0	6	0.285179	1	HYPOTHETICAL protein MELLADRAFT_48850 [Melam larici-populina 98AG31]	EGG05406	5.82809e-49
21933	0	10	0.126722	1	HYPOTHETICAL protein MELLADRAFT_48972 [Melam larici-populina 98AG31]	EGG04949	1.80828e-12
22496	0	9	0.15612	1	HYPOTHETICAL protein MELLADRAFT_49061 [Melam larici-populina 98AG31]	EGG04707	5.58338e-71
21404	0	7	0.232934	1	HYPOTHETICAL protein MELLADRAFT_49109 [Melam larici-populina 98AG31]	EGG04622	5.16898e-05
22267	0	4	0.430439	1	HYPOTHETICAL protein MELLADRAFT_49110 [Melam larici-populina 98AG31]	EGG04639	1.85135e-14
23114	0	2	0.66493	1	HYPOTHETICAL protein MELLADRAFT_49370 [Melam larici-populina 98AG31]	EGG03875	6.08225e-49
25503	0	2	0.66493	1	HYPOTHETICAL protein MELLADRAFT_49429 [Melam larici-populina 98AG31]	EGG03568	5.82785e-43
25483	0	4	0.430439	1	HYPOTHETICAL protein MELLADRAFT_49522 [Melam larici-populina 98AG31]	EGG03227	4.90383e-20
21644	0	13	0.0683089	1	HYPOTHETICAL protein MELLADRAFT_49607 [Melam larici-populina 98AG31]	EGG03179	1.04098e-108
21055	0	7	0.232934	1	HYPOTHETICAL protein MELLADRAFT_50007 [Melam larici-populina 98AG31]	EGG01640	5.98131e-56
21342	0	6	0.285179	1	HYPOTHETICAL protein MELLADRAFT_50027 [Melam larici-populina 98AG31]	EGG01686	2.10733e-43
22678	0	14	0.0560289	1	HYPOTHETICAL protein MELLADRAFT_50064 [Melam larici-populina 98AG31]	EGG01559	3.20553e-38
25475	0	5	0.350129	1	HYPOTHETICAL protein MELLADRAFT_50187 [Melam larici-populina 98AG31]	EGG01210	2.83089e-53
21513	0	9	0.15612	1	HYPOTHETICAL protein MELLADRAFT_50226 [Melam larici-populina 98AG31]	EGG01048	4.71458e-52
23168	0	9	0.15612	1	HYPOTHETICAL protein MELLADRAFT_50387 [Melam larici-populina 98AG31]	EGG00462	1.15294e-26
21673	0	4	0.430439	1	HYPOTHETICAL protein MELLADRAFT_50455 [Melam larici-populina 98AG31]	EGG00281	1.61636e-24
20163	0	3	0.530267	1	HYPOTHETICAL protein MELLADRAFT_50521 [Melam larici-populina 98AG31]	EGG00095	7.45438e-29
25427	0	7	0.232934	1	HYPOTHETICAL protein MELLADRAFT_50754 [Melam larici-populina 98AG31]	EGF99173	6.55201e-11
24999	0	2	0.66493	1	HYPOTHETICAL protein MELLADRAFT_50952 [Melam larici-populina 98AG31]	EGF98671	1.66855e-42
25176	0	3	0.530267	1	HYPOTHETICAL protein MELLADRAFT_50986 [Melam larici-populina 98AG31]	EGF98527	0.309628
26268	0	6	0.285179	1	HYPOTHETICAL protein MELLADRAFT_51012 [Melam larici-populina 98AG31]	EGF98413	7.58469e-36
22912	0	5	0.350129	1	HYPOTHETICAL protein MELLADRAFT_51169 [Melam larici-populina 98AG31]	EGF97553	5.18881e-68
21041	0	6	0.285179	1	HYPOTHETICAL protein MELLADRAFT_51457 [Melam larici-populina 98AG31]	EGG12352	7.7489e-21
22218	0	3	0.530267	1	HYPOTHETICAL protein MELLADRAFT_51507 [Melam larici-populina 98AG31]	EGG12070	0.00163549
26851	0	3	0.530267	1	HYPOTHETICAL protein MELLADRAFT_51787 [Melam larici-populina 98AG31]	EGG10653	1.27574e-16
22656	0	2	0.66493	1	HYPOTHETICAL protein MELLADRAFT_51953 [Melam larici-populina 98AG31]	EGG09804	6.09972e-35
23559	0	10	0.126722	1	HYPOTHETICAL protein MELLADRAFT_52214 [Melam larici-populina 98AG31]	EGG08150	2.82291e-60
21102	0	6	0.285179	1	HYPOTHETICAL protein MELLADRAFT_52941 [Melam larici-populina 98AG31]	EGG04767	1.70725e-19
24045	0	5	0.350129	1	HYPOTHETICAL protein MELLADRAFT_53207 [Melam larici-populina 98AG31]	EGG03500	1.08119e-38
25097	0	2	0.66493	1	HYPOTHETICAL protein MELLADRAFT_53476 [Melam larici-populina 98AG31]	EGG01880	4.04648e-20
21000	0	2	0.66493	1	HYPOTHETICAL protein MELLADRAFT_53667 [Melam larici-populina 98AG31]	EGG01157	2.10354e-25
23605	0	2	0.66493	1	HYPOTHETICAL protein MELLADRAFT_53960 [Melam larici-populina 98AG31]	EGF99673	1.75686e-18
26766	0	2	0.66493	1	HYPOTHETICAL protein MELLADRAFT_54347 [Melam larici-populina 98AG31]	EGF97265	1.26318e-20
26673	0	2	0.66493	1	HYPOTHETICAL protein MELLADRAFT_55113 [Melam larici-populina 98AG31]	EGG10027	6.01348e-05
25473	0	6	0.285179	1	HYPOTHETICAL protein MELLADRAFT_55312 [Melam larici-populina 98AG31]	EGG09852	6.24517e-72
23805	0	4	0.430439	1	HYPOTHETICAL protein MELLADRAFT_55880 [Melam larici-populina 98AG31]	EGG07484	0.0146961
20569	0	3	0.530267	1	HYPOTHETICAL protein MELLADRAFT_56277 [Melam larici-populina 98AG31]	EGG05738	7.51942e-18
26086	0	2	0.66493	1	HYPOTHETICAL protein MELLADRAFT_56421 [Melam larici-populina 98AG31]	EGG05435	6.25613e-06
26597	0	2	0.66493	1	HYPOTHETICAL protein MELLADRAFT_56433 [Melam larici-populina 98AG31]	EGG05421	6.1101e-12
21570	0	2	0.66493	1	HYPOTHETICAL protein MELLADRAFT_57226 [Melam larici-populina 98AG31]	EGG02082	3.62966e-41
26137	0	3	0.530267	1	HYPOTHETICAL protein MELLADRAFT_58832 [Melam larici-populina 98AG31]	EGG12901	0.313898
23377	0	5	0.350129	1	HYPOTHETICAL protein MELLADRAFT_59561 [Melam larici-populina 98AG31]	EGG11709	1.09877e-29
23006	0	4	0.430439	1	HYPOTHETICAL protein MELLADRAFT_60265 [Melam larici-populina 98AG31]	EGG10746	1.37003e-16
23388	0	3	0.530267	1	HYPOTHETICAL protein MELLADRAFT_60797 [Melam larici-populina 98AG31]	EGG09710	4.84785e-12
22449	0	6	0.285179	1	HYPOTHETICAL protein MELLADRAFT_61660 [Melam larici-populina 98AG31]	EGG08872	6.06499e-05
22999	0	10	0.126722	1	HYPOTHETICAL protein MELLADRAFT_62352 [Melam larici-populina 98AG31]	EGG07803	9.84426e-33
20787	0	2	0.66493	1	HYPOTHETICAL protein MELLADRAFT_62878 [Melam larici-populina 98AG31]	EGG07111	19.2684
22336	0	3	0.530267	1	HYPOTHETICAL protein MELLADRAFT_63052 [Melam larici-populina 98AG31]	EGG06931	4.02449e-80
22337	0	5	0.350129	1	HYPOTHETICAL protein MELLADRAFT_63052 [Melam larici-populina 98AG31]	EGG06931	1.04568e-52
22746	0	4	0.430439	1	HYPOTHETICAL protein MELLADRAFT_64121 [Melam larici-populina 98AG31]	EGG05340	4.34695e-08
21423	0	8	0.191526	1	HYPOTHETICAL protein MELLADRAFT_65250 [Melam larici-populina 98AG31]	EGG03954	9.08154e-08
26746	0	6	0.285179	1	HYPOTHETICAL protein MELLADRAFT_65318 [Melam larici-populina 98AG31]	EGG03765	0.0295491
23787	0	8	0.191526	1	HYPOTHETICAL protein MELLADRAFT_66128 [Melam larici-populina 98AG31]	EGG02597	9.80646e-20
23553	0	4	0.430439	1	HYPOTHETICAL protein MELLADRAFT_67424 [Melam larici-populina 98AG31]	EGG00911	4.28408e-40
21975	0	2	0.66493	1	HYPOTHETICAL protein MELLADRAFT_68174 [Melam larici-populina 98AG31]	EGF99960	1.90664e-37
23410	0	10	0.126722	1	HYPOTHETICAL protein MELLADRAFT_68392 [Melam larici-populina 98AG31]	EGF99732	5.40035e-30
22665	0	1	1	1	HYPOTHETICAL protein MELLADRAFT_68674 [Melam larici-populina 98AG31]	EGF99358	0.186401
22666	0	8	0.191526	1	HYPOTHETICAL protein MELLADRAFT_68674 [Melam larici-populina 98AG31]	EGF99358	2.65077e-27
23004	0	11	0.102862	1	HYPOTHETICAL protein MELLADRAFT_70461 [Melam larici-populina 98AG31]	EGG12724	5.7018e-57
21474	0	8	0.191526	1	HYPOTHETICAL protein MELLADRAFT_70474 [Melam larici-populina 98AG31]	EGG13053	4.78766e-47
20627	0	5	0.350129	1	HYPOTHETICAL protein MELLADRAFT_70488 [Melam larici-populina 98AG31]	EGG13031	4.3986e-16
20780	0	5	0.350129	1	HYPOTHETICAL protein MELLADRAFT_70551 [Melam larici-populina 98AG31]	EGG12942	7.59946e-13
25720	0	4	0.430439	1	HYPOTHETICAL protein MELLADRAFT_70720 [Melam larici-populina 98AG31]	EGG12173	2.30779e-36
23337	0	2	0.66493	1	HYPOTHETICAL protein MELLADRAFT_70820 [Melam larici-populina 98AG31]	EGG11458	0.331238
22509	0	4	0.430439	1	HYPOTHETICAL protein MELLADRAFT_70999 [Melam larici-populina 98AG31]	EGG10701	1.23142e-49
25980	0	2	0.66493	1	HYPOTHETICAL protein MELLADRAFT_71015 [Melam larici-populina 98AG31]	EGG10644	1.42345e-12
21706	0	6	0.285179	1	HYPOTHETICAL protein MELLADRAFT_71049 [Melam larici-populina 98AG31]	EGG10357	3.54369e-12
24532	0	4	0.430439	1	HYPOTHETICAL protein MELLADRAFT_71349 [Melam larici-populina 98AG31]	EGG08906	1.23715e-26
25679	0	3	0.530267	1	HYPOTHETICAL protein MELLADRAFT_71351 [Melam larici-populina 98AG31]	EGG08904	0.0769944
25070	0	1	1	1	HYPOTHETICAL protein MELLADRAFT_71355 [Melam larici-populina 98AG31]	EGG08845	7.10366e-63
24037	0	9	0.15612	1	HYPOTHETICAL protein MELLADRAFT_71598 [Melam larici-populina 98AG31]	EGG07976	1.22075e-64
21163	0	7	0.232934	1	HYPOTHETICAL protein MELLADRAFT_71620 [Melam larici-populina 98AG31]	EGG07809	1.21074e-06
26474	0	3	0.530267	1	HYPOTHETICAL protein MELLADRAFT_71644 [Melam larici-populina 98AG31]	EGG07641	6.46959e-19
26668	0	4	0.430439	1	HYPOTHETICAL protein MELLADRAFT_71714 [Melam larici-populina 98AG31]	EGG07348	7.26765e-21
24157	0	4	0.430439	1	HYPOTHETICAL protein MELLADRAFT_71759 [Melam larici-populina 98AG31]	EGG07223	1.07418e-05
23007	0	9	0.15612	1	HYPOTHETICAL protein MELLADRAFT_71817 [Melam larici-populina 98AG31]	EGG07005	5.78617e-76
25181	0	2	0.66493	1	HYPOTHETICAL protein MELLADRAFT_71938 [Melam larici-populina 98AG31]	EGG06453	1.93639e-83
20638	0	7	0.232934	1	HYPOTHETICAL protein MELLADRAFT_71955 [Melam larici-populina 98AG31]	EGG06184	8.6615e-33
21042	0	4	0.430439	1	HYPOTHETICAL protein MELLADRAFT_71990 [Melam larici-populina 98AG31]	EGG05953	2.22314e-18
25167	0	2	0.66493	1	HYPOTHETICAL protein MELLADRAFT_72001 [Melam larici-populina 98AG31]	EGG05982	8.31895e-37
26707	0	2	0.66493	1	HYPOTHETICAL protein MELLADRAFT_72001 [Melam larici-populina 98AG31]	EGG05982	5.73637e-38
26821	0	2	0.66493	1	HYPOTHETICAL protein MELLADRAFT_72156 [Melam larici-populina 98AG31]	EGG05374	0.000287177
22144	0	4	0.430439	1	HYPOTHETICAL protein MELLADRAFT_72166 [Melam larici-populina 98AG31]	EGG05394	2.39974e-14
22992	0	12	0.0835669	1	HYPOTHETICAL protein MELLADRAFT_72166 [Melam larici-populina 98AG31]	EGG05394	2.30387e-30
21053	0	3	0.530267	1	HYPOTHETICAL protein MELLADRAFT_72263 [Melam larici-populina 98AG31]	EGG04966	0.00501827
22469	0	7	0.232934	1	HYPOTHETICAL protein MELLADRAFT_72450 [Melam larici-populina 98AG31]	EGG04132	1.22239e-36
22296	0	2	0.66493	1	HYPOTHETICAL protein MELLADRAFT_72470 [Melam larici-populina 98AG31]	EGG04025	5.14152e-05
23593	0	2	0.66493	1	HYPOTHETICAL protein MELLADRAFT_72633 [Melam larici-populina 98AG31]	EGG03155	3.39062e-57
22529	0	1	1	1	HYPOTHETICAL protein MELLADRAFT_72678 [Melam larici-populina 98AG31]	EGG02990	2.39983e-08
22407	0	3	0.530267	1	HYPOTHETICAL protein MELLADRAFT_72734 [Melam larici-populina 98AG31]	EGG02620	0.0152041
24948	0	4	0.430439	1	HYPOTHETICAL protein MELLADRAFT_72769 [Melam larici-populina 98AG31]	EGG02501	6.15434e-15
25172	0	2	0.66493	1	HYPOTHETICAL protein MELLADRAFT_72876 [Melam larici-populina 98AG31]	EGG02000	9.00207e-31
24095	0	13	0.0683089	1	HYPOTHETICAL protein MELLADRAFT_72927 [Melam larici-populina 98AG31]	EGG01662	5.09215e-76
25447	0	2	0.66493	1	HYPOTHETICAL protein MELLADRAFT_73032 [Melam larici-populina 98AG31]	EGG01323	5.97339e-07
23459	0	11	0.102862	1	HYPOTHETICAL protein MELLADRAFT_73103 [Melam larici-populina 98AG31]	EGG00962	1.35742e-32
24801	0	1	1	1	HYPOTHETICAL protein MELLADRAFT_73226 [Melam larici-populina 98AG31]	EGG00250	6.71939e-22
24802	0	3	0.530267	1	HYPOTHETICAL protein MELLADRAFT_73226 [Melam larici-populina 98AG31]	EGG00250	6.35855e-23
26710	0	3	0.530267	1	HYPOTHETICAL protein MELLADRAFT_73226 [Melam larici-populina 98AG31]	EGG00250	2.96845e-25
25255	0	1	1	1	HYPOTHETICAL protein MELLADRAFT_73392 [Melam larici-populina 98AG31]	EGF99492	4.65632e-65
22195	0	6	0.285179	1	HYPOTHETICAL protein MELLADRAFT_73607 [Melam larici-populina 98AG31]	EGF98397	1.25889e-24
21197	0	4	0.430439	1	HYPOTHETICAL protein MELLADRAFT_73855 [Melam larici-populina 98AG31]	EGG12771	1.27367e-16
21707	0	14	0.0560289	1	HYPOTHETICAL protein MELLADRAFT_73963 [Melam larici-populina 98AG31]	EGG12010	1.52296e-27
24522	0	5	0.350129	1	HYPOTHETICAL protein MELLADRAFT_74086 [Melam larici-populina 98AG31]	EGG11574	1.96842e-16
26860	0	2	0.66493	1	HYPOTHETICAL protein MELLADRAFT_74217 [Melam larici-populina 98AG31]	EGG10025	4.18703e-09
22924	0	2	0.66493	1	HYPOTHETICAL protein MELLADRAFT_74594 [Melam larici-populina 98AG31]	EGG07883	1.40721e-22
22080	0	9	0.15612	1	HYPOTHETICAL protein MELLADRAFT_74676 [Melam larici-populina 98AG31]	EGG07521	6.33507e-52
22635	0	7	0.232934	1	HYPOTHETICAL protein MELLADRAFT_74912 [Melam larici-populina 98AG31]	EGG06059	2.06806e-17
22204	0	5	0.350129	1	HYPOTHETICAL protein MELLADRAFT_75016 [Melam larici-populina 98AG31]	EGG05358	1.03307e-14
14386	0	7	0.232934	1	HYPOTHETICAL protein MELLADRAFT_75483 [Melam larici-populina 98AG31]	EGG02392	2.71732e-06
25026	0	2	0.66493	1	HYPOTHETICAL protein MELLADRAFT_75515 [Melam larici-populina 98AG31]	EGG02109	8.92545e-34
23701	0	7	0.232934	1	HYPOTHETICAL protein MELLADRAFT_75544 [Melam larici-populina 98AG31]	EGG01935	4.33904e-27
20826	0	11	0.102862	1	HYPOTHETICAL protein MELLADRAFT_75619 [Melam larici-populina 98AG31]	EGG01474	0.0713993
25964	0	3	0.530267	1	HYPOTHETICAL protein MELLADRAFT_75718 [Melam larici-populina 98AG31]	EGG00822	9.31846e-14
26554	0	4	0.430439	1	HYPOTHETICAL protein MELLADRAFT_75718 [Melam larici-populina 98AG31]	EGG00822	1.07797e-10
21193	0	4	0.430439	1	HYPOTHETICAL protein MELLADRAFT_75802 [Melam larici-populina 98AG31]	EGG00255	1.894e-09
20813	0	5	0.350129	1	HYPOTHETICAL protein MELLADRAFT_75821 [Melam larici-populina 98AG31]	EGG00157	5.47648e-34
22507	0	14	0.0560289	1	HYPOTHETICAL protein MELLADRAFT_76059 [Melam larici-populina 98AG31]	EGF98570	7.65497e-71
20656	0	9	0.15612	1	HYPOTHETICAL protein MELLADRAFT_76180 [Melam larici-populina 98AG31]	EGF97482	1.95513e-11
20533	0	6	0.285179	1	HYPOTHETICAL protein MELLADRAFT_76310 [Melam larici-populina 98AG31]	EGG12693	6.21846e-14
26553	0	2	0.66493	1	HYPOTHETICAL protein MELLADRAFT_76444 [Melam larici-populina 98AG31]	EGG12477	1.19612e-08
22217	0	7	0.232934	1	HYPOTHETICAL protein MELLADRAFT_76796 [Melam larici-populina 98AG31]	EGG10415	11.9661
24717	0	3	0.530267	1	HYPOTHETICAL protein MELLADRAFT_76846 [Melam larici-populina 98AG31]	EGG10500	8.12215e-21
24823	0	4	0.430439	1	HYPOTHETICAL protein MELLADRAFT_76971 [Melam larici-populina 98AG31]	EGG10158	8.3336
26404	0	2	0.66493	1	HYPOTHETICAL protein MELLADRAFT_77173 [Melam larici-populina 98AG31]	EGG09295	8.00301e-22
23313	0	10	0.126722	1	HYPOTHETICAL protein MELLADRAFT_77343 [Melam larici-populina 98AG31]	EGG08531	1.40184e-63
26022	0	3	0.530267	1	HYPOTHETICAL protein MELLADRAFT_77581 [Melam larici-populina 98AG31]	EGG07492	0.00069639
25289	0	1	1	1	HYPOTHETICAL protein MELLADRAFT_77699 [Melam larici-populina 98AG31]	EGG07126	9.50366e-21
25290	0	2	0.66493	1	HYPOTHETICAL protein MELLADRAFT_77699 [Melam larici-populina 98AG31]	EGG07126	1.64581e-20
27211	0	2	0.66493	1	HYPOTHETICAL protein MELLADRAFT_77699 [Melam larici-populina 98AG31]	EGG07126	6.33946e-34
14533	0	10	0.126722	1	HYPOTHETICAL protein MELLADRAFT_78206 [Melam larici-populina 98AG31]	EGG04933	6.23643e-14
22357	0	7	0.232934	1	HYPOTHETICAL protein MELLADRAFT_78608 [Melam larici-populina 98AG31]	EGG03285	1.89923e-08
21425	0	2	0.66493	1	HYPOTHETICAL protein MELLADRAFT_78765 [Melam larici-populina 98AG31]	EGG02460	3.87628e-15
25939	0	6	0.285179	1	HYPOTHETICAL protein MELLADRAFT_78765 [Melam larici-populina 98AG31]	EGG02460	1.06585e-30
21630	0	1	1	1	HYPOTHETICAL protein MELLADRAFT_78798 [Melam larici-populina 98AG31]	EGG02322	91.6807
24340	0	2	0.66493	1	HYPOTHETICAL protein MELLADRAFT_78806 [Melam larici-populina 98AG31]	EGG02407	6.55391e-52
24291	0	4	0.430439	1	HYPOTHETICAL protein MELLADRAFT_79093 [Melam larici-populina 98AG31]	EGG01101	1.62974e-15
21837	0	9	0.15612	1	HYPOTHETICAL protein MELLADRAFT_79168 [Melam larici-populina 98AG31]	EGG00694	6.71924e-67
22493	0	6	0.285179	1	HYPOTHETICAL protein MELLADRAFT_79569 [Melam larici-populina 98AG31]	EGF98976	5.19109e-49
26546	0	2	0.66493	1	HYPOTHETICAL protein MELLADRAFT_79816 [Melam larici-populina 98AG31]	EGF97645	2.54909e-23
22553	0	13	0.0683089	1	HYPOTHETICAL protein MELLADRAFT_84135 [Melam larici-populina 98AG31]	EGF97952	3.77585e-29
25506	0	2	0.66493	1	HYPOTHETICAL protein MELLADRAFT_84477 [Melam larici-populina 98AG31]	EGF97764	4.29189e-35
23455	0	2	0.66493	1	HYPOTHETICAL protein MELLADRAFT_85226 [Melam larici-populina 98AG31]	EGG08042	6.57247e-12
23462	0	2	0.66493	1	HYPOTHETICAL protein MELLADRAFT_85226 [Melam larici-populina 98AG31]	EGG08042	2.94963e-23
23463	0	6	0.285179	1	HYPOTHETICAL protein MELLADRAFT_85226 [Melam larici-populina 98AG31]	EGG08042	1.45019e-17
26800	0	2	0.66493	1	HYPOTHETICAL protein MELLADRAFT_85404 [Melam larici-populina 98AG31]	EGG07823	2.48304e-06
22254	0	5	0.350129	1	HYPOTHETICAL protein MELLADRAFT_85522 [Melam larici-populina 98AG31]	EGG07652	2.91433e-23
25522	0	2	0.66493	1	HYPOTHETICAL protein MELLADRAFT_85717 [Melam larici-populina 98AG31]	EGG07317	2.70072e-14
25523	0	3	0.530267	1	HYPOTHETICAL protein MELLADRAFT_85717 [Melam larici-populina 98AG31]	EGG07317	6.34713e-16
24236	0	3	0.530267	1	HYPOTHETICAL protein MELLADRAFT_86141 [Melam larici-populina 98AG31]	EGG07006	4.15924e-10
24389	0	2	0.66493	1	HYPOTHETICAL protein MELLADRAFT_86725 [Melam larici-populina 98AG31]	EGG12571	3.29906e-24
26358	0	4	0.430439	1	HYPOTHETICAL protein MELLADRAFT_86745 [Melam larici-populina 98AG31]	EGG12587	1.3508e-39
23775	0	3	0.530267	1	HYPOTHETICAL protein MELLADRAFT_86980 [Melam larici-populina 98AG31]	EGG12729	6.33644e-28
22356	0	3	0.530267	1	HYPOTHETICAL protein MELLADRAFT_87024 [Melam larici-populina 98AG31]	EGG13040	1.51125e-09
23825	0	2	0.66493	1	HYPOTHETICAL protein MELLADRAFT_87230 [Melam larici-populina 98AG31]	EGG12893	3.17069e-32
25050	0	2	0.66493	1	HYPOTHETICAL protein MELLADRAFT_87292 [Melam larici-populina 98AG31]	EGG06148	0.000320744
23281	0	4	0.430439	1	HYPOTHETICAL protein MELLADRAFT_87302 [Melam larici-populina 98AG31]	EGG06157	5.47485e-51
22020	0	7	0.232934	1	HYPOTHETICAL protein MELLADRAFT_88580 [Melam larici-populina 98AG31]	EGG04816	2.11635e-12
22718	0	3	0.530267	1	HYPOTHETICAL protein MELLADRAFT_88654 [Melam larici-populina 98AG31]	EGG04691	4.94215e-13
22594	0	5	0.350129	1	HYPOTHETICAL protein MELLADRAFT_88891 [Melam larici-populina 98AG31]	EGG12523	0.000542347
23578	0	7	0.232934	1	HYPOTHETICAL protein MELLADRAFT_88929 [Melam larici-populina 98AG31]	EGG11847	2.43973e-34
21654	0	1	1	1	HYPOTHETICAL protein MELLADRAFT_89050 [Melam larici-populina 98AG31]	EGG11930	2.57138e-18
21661	0	1	1	1	HYPOTHETICAL protein MELLADRAFT_89050 [Melam larici-populina 98AG31]	EGG11930	1.886e-30
27115	0	6	0.285179	1	HYPOTHETICAL protein MELLADRAFT_89050 [Melam larici-populina 98AG31]	EGG11930	1.45117e-29
20557	0	14	0.0560289	1	HYPOTHETICAL protein MELLADRAFT_89115 [Melam larici-populina 98AG31]	EGG11972	6.79311e-86
25180	0	4	0.430439	1	HYPOTHETICAL protein MELLADRAFT_89474 [Melam larici-populina 98AG31]	EGG04256	1.13066e-30
26070	0	3	0.530267	1	HYPOTHETICAL protein MELLADRAFT_89561 [Melam larici-populina 98AG31]	EGG04204	8.92516e-15
23174	0	7	0.232934	1	HYPOTHETICAL protein MELLADRAFT_89800 [Melam larici-populina 98AG31]	EGG03729	1.43333e-15
20517	0	14	0.0560289	1	HYPOTHETICAL protein MELLADRAFT_89985 [Melam larici-populina 98AG31]	EGG03596	1.15704e-27
21138	0	6	0.285179	1	HYPOTHETICAL protein MELLADRAFT_90062 [Melam larici-populina 98AG31] >gi|328854509|gb|EGG03641.1| HYPOTHETICAL protein MELLADRAFT_90068 [Melam larici-populina 98AG31]	EGG03637	7.96009e-27
23730	0	5	0.350129	1	HYPOTHETICAL protein MELLADRAFT_90242 [Melam larici-populina 98AG31]	EGG03363	5.14248e-10
23490	0	9	0.15612	1	HYPOTHETICAL protein MELLADRAFT_90288 [Melam larici-populina 98AG31]	EGG03268	2.45865e-58
25814	0	2	0.66493	1	HYPOTHETICAL protein MELLADRAFT_90379 [Melam larici-populina 98AG31]	EGG03191	4.96139e-14
26013	0	2	0.66493	1	HYPOTHETICAL protein MELLADRAFT_90822 [Melam larici-populina 98AG31]	EGG11341	2.31268e-19
23710	0	3	0.530267	1	HYPOTHETICAL protein MELLADRAFT_90949 [Melam larici-populina 98AG31]	EGG11673	94.7732
24371	0	5	0.350129	1	HYPOTHETICAL protein MELLADRAFT_91046 [Melam larici-populina 98AG31]	EGG11604	6.46829e-10
22939	0	4	0.430439	1	HYPOTHETICAL protein MELLADRAFT_92084 [Melam larici-populina 98AG31]	EGG01564	4.24154e-19
26643	0	2	0.66493	1	HYPOTHETICAL protein MELLADRAFT_92148 [Melam larici-populina 98AG31]	EGG01472	1.65652e-30
24539	0	1	1	1	HYPOTHETICAL protein MELLADRAFT_92446 [Melam larici-populina 98AG31]	EGG11015	5.94834
24542	0	1	1	1	HYPOTHETICAL protein MELLADRAFT_92446 [Melam larici-populina 98AG31]	EGG11015	0.0215268
23816	0	1	1	1	HYPOTHETICAL protein MELLADRAFT_92555 [Melam larici-populina 98AG31]	EGG01356	2.29932e-06
26900	0	2	0.66493	1	HYPOTHETICAL protein MELLADRAFT_93061 [Melam larici-populina 98AG31]	EGG00743	1.83724e-18
20482	0	13	0.0683089	1	HYPOTHETICAL protein MELLADRAFT_93158 [Melam larici-populina 98AG31]	EGG00586	6.41673e-42
23857	0	4	0.430439	1	HYPOTHETICAL protein MELLADRAFT_93205 [Melam larici-populina 98AG31]	EGG00533	1.77557e-26
22856	0	4	0.430439	1	HYPOTHETICAL protein MELLADRAFT_93251 [Melam larici-populina 98AG31]	EGG00411	4.85266e-24
26276	0	3	0.530267	1	HYPOTHETICAL protein MELLADRAFT_93268 [Melam larici-populina 98AG31]	EGG00430	1.49909e-05
22936	0	2	0.66493	1	HYPOTHETICAL protein MELLADRAFT_94057 [Melam larici-populina 98AG31]	EGF99840	0.571169
25041	0	2	0.66493	1	HYPOTHETICAL protein MELLADRAFT_94371 [Melam larici-populina 98AG31]	EGG10043	1.15085e-09
21043	0	2	0.66493	1	HYPOTHETICAL protein MELLADRAFT_94527 [Melam larici-populina 98AG31]	EGG10293	2.06408e-49
24195	0	3	0.530267	1	HYPOTHETICAL protein MELLADRAFT_94662 [Melam larici-populina 98AG31]	EGF99410	3.04166e-05
24617	0	10	0.126722	1	HYPOTHETICAL protein MELLADRAFT_94996 [Melam larici-populina 98AG31]	EGF98942	5.76952e-08
22312	0	4	0.430439	1	HYPOTHETICAL protein MELLADRAFT_95062 [Melam larici-populina 98AG31]	EGF98906	2.92242e-39
24708	0	5	0.350129	1	HYPOTHETICAL protein MELLADRAFT_95176 [Melam larici-populina 98AG31]	EGG09720	5.68282e-41
21546	0	13	0.0683089	1	HYPOTHETICAL protein MELLADRAFT_95366 [Melam larici-populina 98AG31]	EGG09872	1.14641e-10
25751	0	8	0.191526	1	HYPOTHETICAL protein MELLADRAFT_95949 [Melam larici-populina 98AG31]	EGG09466	4.19043e-18
25825	0	2	0.66493	1	HYPOTHETICAL protein MELLADRAFT_95996 [Melam larici-populina 98AG31]	EGG09520	5.99566e-26
21390	0	13	0.0683089	1	HYPOTHETICAL protein MELLADRAFT_96159 [Melam larici-populina 98AG31]	EGF98092	0.00436365
26693	0	3	0.530267	1	HYPOTHETICAL protein MELLADRAFT_96392 [Melam larici-populina 98AG31]	EGG09121	5.21741e-12
21914	0	12	0.0835669	1	HYPOTHETICAL protein MELLADRAFT_96400 [Melam larici-populina 98AG31]	EGG09129	1.4036e-47
25306	0	6	0.285179	1	HYPOTHETICAL protein MGL_3753 [Malassezia globosa CBS 7966] >gi|159103176|gb|EDP42072.1| HYPOTHETICAL protein MGL_3753 [Malassezia globosa CBS 7966]	XP_001729286	3.8608e-58
7617	0	3	0.530267	1	HYPOTHETICAL protein MPER_03800 [Moniliophthora perniciosa FA553] >gi|215467827|gb|EEB96973.1| HYPOTHETICAL protein MPER_03800 [Moniliophthora perniciosa FA553]	XP_002396043	6.12619e-19
21183	0	7	0.232934	1	HYPOTHETICAL protein MPER_16276 [Moniliophthora perniciosa FA553] >gi|215435687|gb|EEB86683.1| HYPOTHETICAL protein MPER_16276 [Moniliophthora perniciosa FA553]	XP_002385753	11.5271
13388	0	4	0.430439	1	HYPOTHETICAL protein PGTG_00002 [PUCCINIA graminis f. sp. tritici CRL 75-36-700-3]	EFP74046	0.00778074
26237	0	2	0.66493	1	HYPOTHETICAL protein PGTG_00004 [PUCCINIA graminis f. sp. tritici CRL 75-36-700-3]	XP_003307054	5.86409e-41
21824	0	3	0.530267	1	HYPOTHETICAL protein PGTG_00037 [PUCCINIA graminis f. sp. tritici CRL 75-36-700-3]	EFP74081	8.15626
21927	0	3	0.530267	1	HYPOTHETICAL protein PGTG_00062 [PUCCINIA graminis f. sp. tritici CRL 75-36-700-3] >gi|309297515|gb|EFP74106.1| HYPOTHETICAL protein PGTG_00062 [PUCCINIA graminis f. sp. tritici CRL 75-36-700-3]	XP_003307112	2.08226e-19
25017	0	2	0.66493	1	HYPOTHETICAL protein PGTG_00083 [PUCCINIA graminis f. sp. tritici CRL 75-36-700-3] >gi|309297536|gb|EFP74127.1| HYPOTHETICAL protein PGTG_00083 [PUCCINIA graminis f. sp. tritici CRL 75-36-700-3]	XP_003307133	2.22898e-23
25604	0	2	0.66493	1	HYPOTHETICAL protein PGTG_00083 [PUCCINIA graminis f. sp. tritici CRL 75-36-700-3] >gi|309297536|gb|EFP74127.1| HYPOTHETICAL protein PGTG_00083 [PUCCINIA graminis f. sp. tritici CRL 75-36-700-3]	XP_003307133	5.75896e-06
24018	0	3	0.530267	1	HYPOTHETICAL protein PGTG_00087 [PUCCINIA graminis f. sp. tritici CRL 75-36-700-3] >gi|309297540|gb|EFP74131.1| HYPOTHETICAL protein PGTG_00087 [PUCCINIA graminis f. sp. tritici CRL 75-36-700-3]	XP_003307137	2.98551e-06
22603	0	12	0.0835669	1	HYPOTHETICAL protein PGTG_00128 [PUCCINIA graminis f. sp. tritici CRL 75-36-700-3] >gi|309297581|gb|EFP74172.1| HYPOTHETICAL protein PGTG_00128 [PUCCINIA graminis f. sp. tritici CRL 75-36-700-3]	XP_003307178	2.09243e-12
26048	0	3	0.530267	1	HYPOTHETICAL protein PGTG_00159 [PUCCINIA graminis f. sp. tritici CRL 75-36-700-3]	EFP74203	5.43738e-11
23976	0	7	0.232934	1	HYPOTHETICAL protein PGTG_00223 [PUCCINIA graminis f. sp. tritici CRL 75-36-700-3] >gi|309297676|gb|EFP74267.1| signal peptidase I [PUCCINIA graminis f. sp. tritici CRL 75-36-700-3]	XP_003307273	5.20567e-51
23074	0	2	0.66493	1	HYPOTHETICAL protein PGTG_00226 [PUCCINIA graminis f. sp. tritici CRL 75-36-700-3] >gi|309297679|gb|EFP74270.1| chalcone-flavanone isomerase [PUCCINIA graminis f. sp. tritici CRL 75-36-700-3]	XP_003307276	1.49991e-17
20398	0	1	1	1	HYPOTHETICAL protein PGTG_00256 [PUCCINIA graminis f. sp. tritici CRL 75-36-700-3]	EFP74300	1.19373
27212	0	1	1	1	HYPOTHETICAL protein PGTG_00256 [PUCCINIA graminis f. sp. tritici CRL 75-36-700-3]	EFP74300	0.040937
23876	0	6	0.285179	1	HYPOTHETICAL protein PGTG_00328 [PUCCINIA graminis f. sp. tritici CRL 75-36-700-3] >gi|309297781|gb|EFP74372.1| HYPOTHETICAL protein PGTG_00328 [PUCCINIA graminis f. sp. tritici CRL 75-36-700-3]	XP_003307378	1.44103e-20
20976	0	4	0.430439	1	HYPOTHETICAL protein PGTG_00347 [PUCCINIA graminis f. sp. tritici CRL 75-36-700-3] >gi|309297800|gb|EFP74391.1| small nuclear ribonucleoprotein E [PUCCINIA graminis f. sp. tritici CRL 75-36-700-3]	XP_003307397	4.86687e-06
21672	0	2	0.66493	1	HYPOTHETICAL protein PGTG_00387 [PUCCINIA graminis f. sp. tritici CRL 75-36-700-3]	EFP74431	0.645546
12975	0	7	0.232934	1	HYPOTHETICAL protein PGTG_00397 [PUCCINIA graminis f. sp. tritici CRL 75-36-700-3] >gi|309297850|gb|EFP74441.1| HYPOTHETICAL protein PGTG_00397 [PUCCINIA graminis f. sp. tritici CRL 75-36-700-3]	XP_003307447	25.8539
24968	0	3	0.530267	1	HYPOTHETICAL protein PGTG_00398 [PUCCINIA graminis f. sp. tritici CRL 75-36-700-3]	EFP74442	1.08779e-28
25385	0	2	0.66493	1	HYPOTHETICAL protein PGTG_00511 [PUCCINIA graminis f. sp. tritici CRL 75-36-700-3] >gi|309297964|gb|EFP74555.1| phosphatidylserine decarboxylase [PUCCINIA graminis f. sp. tritici CRL 75-36-700-3]	XP_003307561	0.0120828
26822	0	2	0.66493	1	HYPOTHETICAL protein PGTG_00597 [PUCCINIA graminis f. sp. tritici CRL 75-36-700-3]	XP_003307647	1.21399e-22
25517	0	2	0.66493	1	HYPOTHETICAL protein PGTG_00732 [PUCCINIA graminis f. sp. tritici CRL 75-36-700-3] >gi|309298185|gb|EFP74776.1| HYPOTHETICAL protein PGTG_00732 [PUCCINIA graminis f. sp. tritici CRL 75-36-700-3]	XP_003307782	2.85493e-10
20119	0	6	0.285179	1	HYPOTHETICAL protein PGTG_00811 [PUCCINIA graminis f. sp. tritici CRL 75-36-700-3] >gi|309298889|gb|EFP75480.1| HYPOTHETICAL protein PGTG_00811 [PUCCINIA graminis f. sp. tritici CRL 75-36-700-3]	XP_003319899	6.71425e-11
26814	0	2	0.66493	1	HYPOTHETICAL protein PGTG_00876 [PUCCINIA graminis f. sp. tritici CRL 75-36-700-3]	EFP75545	4.11493e-06
25841	0	2	0.66493	1	HYPOTHETICAL protein PGTG_00883 [PUCCINIA graminis f. sp. tritici CRL 75-36-700-3]	XP_003319971	1.19107e-14
25264	0	2	0.66493	1	HYPOTHETICAL protein PGTG_01021 [PUCCINIA graminis f. sp. tritici CRL 75-36-700-3]	EFP75690	3.28346e-43
25961	0	2	0.66493	1	HYPOTHETICAL protein PGTG_01101 [PUCCINIA graminis f. sp. tritici CRL 75-36-700-3] >gi|309299179|gb|EFP75770.1| HYPOTHETICAL protein PGTG_01101 [PUCCINIA graminis f. sp. tritici CRL 75-36-700-3]	XP_003320189	1.71725
21438	0	6	0.285179	1	HYPOTHETICAL protein PGTG_01246 [PUCCINIA graminis f. sp. tritici CRL 75-36-700-3]	XP_003320334	2.61099e-13
20975	0	10	0.126722	1	HYPOTHETICAL protein PGTG_01284 [PUCCINIA graminis f. sp. tritici CRL 75-36-700-3] >gi|309299362|gb|EFP75953.1| HYPOTHETICAL protein PGTG_01284 [PUCCINIA graminis f. sp. tritici CRL 75-36-700-3]	XP_003320372	3.50294e-46
26753	0	6	0.285179	1	HYPOTHETICAL protein PGTG_01318 [PUCCINIA graminis f. sp. tritici CRL 75-36-700-3] >gi|309299396|gb|EFP75987.1| replication factor C subunit 2/4 [PUCCINIA graminis f. sp. tritici CRL 75-36-700-3]	XP_003320406	3.49638e-14
24260	0	2	0.66493	1	HYPOTHETICAL protein PGTG_01320 [PUCCINIA graminis f. sp. tritici CRL 75-36-700-3]	XP_003320408	2.20326e-23
21233	0	3	0.530267	1	HYPOTHETICAL protein PGTG_01500 [PUCCINIA graminis f. sp. tritici CRL 75-36-700-3] >gi|309298316|gb|EFP74907.1| HYPOTHETICAL protein PGTG_01500 [PUCCINIA graminis f. sp. tritici CRL 75-36-700-3]	XP_003319326	0.666643
21649	0	4	0.430439	1	HYPOTHETICAL protein PGTG_01504 [PUCCINIA graminis f. sp. tritici CRL 75-36-700-3]	EFP74911	1.92424e-37
20771	0	3	0.530267	1	HYPOTHETICAL protein PGTG_01609 [PUCCINIA graminis f. sp. tritici CRL 75-36-700-3]	XP_003319435	2.8921e-10
21874	0	11	0.102862	1	HYPOTHETICAL protein PGTG_01618 [PUCCINIA graminis f. sp. tritici CRL 75-36-700-3]	EFP75025	6.44815e-51
21484	0	6	0.285179	1	HYPOTHETICAL protein PGTG_01801 [PUCCINIA graminis f. sp. tritici CRL 75-36-700-3]	XP_003319627	1.85451e-20
20858	0	7	0.232934	1	HYPOTHETICAL protein PGTG_01848 [PUCCINIA graminis f. sp. tritici CRL 75-36-700-3]	EFP75255	5.77166e-74
21828	0	8	0.191526	1	HYPOTHETICAL protein PGTG_01887 [PUCCINIA graminis f. sp. tritici CRL 75-36-700-3]	EFP75294	1.83211e-74
23046	0	2	0.66493	1	HYPOTHETICAL protein PGTG_01955 [PUCCINIA graminis f. sp. tritici CRL 75-36-700-3] >gi|309298771|gb|EFP75362.1| HYPOTHETICAL protein PGTG_01955 [PUCCINIA graminis f. sp. tritici CRL 75-36-700-3]	XP_003319781	7.08956e-07
23760	0	10	0.126722	1	HYPOTHETICAL protein PGTG_02136 [PUCCINIA graminis f. sp. tritici CRL 75-36-700-3] >gi|309300084|gb|EFP76675.1| HYPOTHETICAL protein PGTG_02136 [PUCCINIA graminis f. sp. tritici CRL 75-36-700-3]	XP_003321094	2.55912e-17
24354	0	2	0.66493	1	HYPOTHETICAL protein PGTG_02137 [PUCCINIA graminis f. sp. tritici CRL 75-36-700-3]	XP_003321095	5.21208e-12
23878	0	2	0.66493	1	HYPOTHETICAL protein PGTG_02152 [PUCCINIA graminis f. sp. tritici CRL 75-36-700-3] >gi|309300100|gb|EFP76691.1| HYPOTHETICAL protein PGTG_02152 [PUCCINIA graminis f. sp. tritici CRL 75-36-700-3]	XP_003321110	8.07895e-14
23886	0	5	0.350129	1	HYPOTHETICAL protein PGTG_02329 [PUCCINIA graminis f. sp. tritici CRL 75-36-700-3] >gi|309300277|gb|EFP76868.1| sphinganine-1-phosphate aldolase [PUCCINIA graminis f. sp. tritici CRL 75-36-700-3]	XP_003321287	2.64483e-35
4756	0	2	0.66493	1	HYPOTHETICAL protein PGTG_02361 [PUCCINIA graminis f. sp. tritici CRL 75-36-700-3] >gi|309300309|gb|EFP76900.1| HYPOTHETICAL protein PGTG_02361 [PUCCINIA graminis f. sp. tritici CRL 75-36-700-3]	XP_003321319	8.06939e-30
22693	0	2	0.66493	1	HYPOTHETICAL protein PGTG_02368 [PUCCINIA graminis f. sp. tritici CRL 75-36-700-3]	EFP76907	3.72111e-32
24472	0	2	0.66493	1	HYPOTHETICAL protein PGTG_02399 [PUCCINIA graminis f. sp. tritici CRL 75-36-700-3]	EFP76938	1.00143e-14
24589	0	2	0.66493	1	HYPOTHETICAL protein PGTG_02428 [PUCCINIA graminis f. sp. tritici CRL 75-36-700-3]	EFP76967	2.42914e-09
20623	0	12	0.0835669	1	HYPOTHETICAL protein PGTG_02431 [PUCCINIA graminis f. sp. tritici CRL 75-36-700-3]	XP_003321389	4.76571e-19
24133	0	7	0.232934	1	HYPOTHETICAL protein PGTG_02578 [PUCCINIA graminis f. sp. tritici CRL 75-36-700-3]	XP_003320556	6.30593e-22
24593	0	5	0.350129	1	HYPOTHETICAL protein PGTG_02672 [PUCCINIA graminis f. sp. tritici CRL 75-36-700-3] >gi|309299640|gb|EFP76231.1| HYPOTHETICAL protein PGTG_02672 [PUCCINIA graminis f. sp. tritici CRL 75-36-700-3]	XP_003320650	2.77811e-52
22431	0	7	0.232934	1	HYPOTHETICAL protein PGTG_02673 [PUCCINIA graminis f. sp. tritici CRL 75-36-700-3] >gi|309299641|gb|EFP76232.1| HYPOTHETICAL protein PGTG_02673 [PUCCINIA graminis f. sp. tritici CRL 75-36-700-3]	XP_003320651	4.88409e-66
23814	0	2	0.66493	1	HYPOTHETICAL protein PGTG_02947 [PUCCINIA graminis f. sp. tritici CRL 75-36-700-3]	EFP76506	1.14992e-31
24910	0	13	0.0683089	1	HYPOTHETICAL protein PGTG_02978 [PUCCINIA graminis f. sp. tritici CRL 75-36-700-3] >gi|309299946|gb|EFP76537.1| HYPOTHETICAL protein PGTG_02978 [PUCCINIA graminis f. sp. tritici CRL 75-36-700-3]	XP_003320956	6.27819e-102
25272	0	2	0.66493	1	HYPOTHETICAL protein PGTG_03034 [PUCCINIA graminis f. sp. tritici CRL 75-36-700-3] >gi|309300487|gb|EFP77078.1| bis(5'-nucleosidyl)-tetraphosphatase [PUCCINIA graminis f. sp. tritici CRL 75-36-700-3]	XP_003321497	2.25032e-10
24191	0	2	0.66493	1	HYPOTHETICAL protein PGTG_03067 [PUCCINIA graminis f. sp. tritici CRL 75-36-700-3] >gi|309300520|gb|EFP77111.1| HYPOTHETICAL protein PGTG_03067 [PUCCINIA graminis f. sp. tritici CRL 75-36-700-3]	XP_003321530	2.62063e-09
23436	0	3	0.530267	1	HYPOTHETICAL protein PGTG_03096 [PUCCINIA graminis f. sp. tritici CRL 75-36-700-3]	EFP77140	14.5686
23987	0	6	0.285179	1	HYPOTHETICAL protein PGTG_03169 [PUCCINIA graminis f. sp. tritici CRL 75-36-700-3]	XP_003321632	0.00779876
26153	0	2	0.66493	1	HYPOTHETICAL protein PGTG_03217 [PUCCINIA graminis f. sp. tritici CRL 75-36-700-3]	EFP77261	7.90091e-05
26347	0	2	0.66493	1	HYPOTHETICAL protein PGTG_03239 [PUCCINIA graminis f. sp. tritici CRL 75-36-700-3] >gi|309300692|gb|EFP77283.1| HYPOTHETICAL protein PGTG_03239 [PUCCINIA graminis f. sp. tritici CRL 75-36-700-3] >gi|375171233|gb|EHS64316.1| HYPOTHETICAL protein, variant [PUCCINIA graminis f. sp. tritici CRL 75-36-700-3]	XP_003321702	0.129099
21372	0	13	0.0683089	1	HYPOTHETICAL protein PGTG_03350 [PUCCINIA graminis f. sp. tritici CRL 75-36-700-3]	EFP77394	3.55103e-08
26533	0	2	0.66493	1	HYPOTHETICAL protein PGTG_03356 [PUCCINIA graminis f. sp. tritici CRL 75-36-700-3] >gi|309300809|gb|EFP77400.1| HYPOTHETICAL protein PGTG_03356 [PUCCINIA graminis f. sp. tritici CRL 75-36-700-3]	XP_003321819	8.05281e-16
21807	0	8	0.191526	1	HYPOTHETICAL protein PGTG_03444 [PUCCINIA graminis f. sp. tritici CRL 75-36-700-3] >gi|309300897|gb|EFP77488.1| HYPOTHETICAL protein PGTG_03444 [PUCCINIA graminis f. sp. tritici CRL 75-36-700-3]	XP_003321907	11.4388
21074	0	10	0.126722	1	HYPOTHETICAL protein PGTG_03509 [PUCCINIA graminis f. sp. tritici CRL 75-36-700-3]	EFP77553	0.00379017
22740	0	7	0.232934	1	HYPOTHETICAL protein PGTG_03509 [PUCCINIA graminis f. sp. tritici CRL 75-36-700-3]	EFP77553	1.16209e-33
26891	0	2	0.66493	1	HYPOTHETICAL protein PGTG_03551 [PUCCINIA graminis f. sp. tritici CRL 75-36-700-3]	EFP77595	3.12761e-06
21796	0	5	0.350129	1	HYPOTHETICAL protein PGTG_03646 [PUCCINIA graminis f. sp. tritici CRL 75-36-700-3]	EFP77690	4.63297e-15
21281	0	8	0.191526	1	HYPOTHETICAL protein PGTG_03655 [PUCCINIA graminis f. sp. tritici CRL 75-36-700-3] >gi|309301108|gb|EFP77699.1| HYPOTHETICAL protein PGTG_03655 [PUCCINIA graminis f. sp. tritici CRL 75-36-700-3]	XP_003322118	1.22093e-14
22837	0	2	0.66493	1	HYPOTHETICAL protein PGTG_03769 [PUCCINIA graminis f. sp. tritici CRL 75-36-700-3] >gi|309301222|gb|EFP77813.1| HYPOTHETICAL protein PGTG_03769 [PUCCINIA graminis f. sp. tritici CRL 75-36-700-3]	XP_003322232	0.000386556
25983	0	2	0.66493	1	HYPOTHETICAL protein PGTG_03907 [PUCCINIA graminis f. sp. tritici CRL 75-36-700-3] >gi|309301360|gb|EFP77951.1| HYPOTHETICAL protein PGTG_03907 [PUCCINIA graminis f. sp. tritici CRL 75-36-700-3]	XP_003322370	7.57765e-23
23912	0	2	0.66493	1	HYPOTHETICAL protein PGTG_03983 [PUCCINIA graminis f. sp. tritici CRL 75-36-700-3]	EFP78027	4.76262e-23
23448	0	2	0.66493	1	HYPOTHETICAL protein PGTG_03998 [PUCCINIA graminis f. sp. tritici CRL 75-36-700-3] >gi|309301451|gb|EFP78042.1| HYPOTHETICAL protein PGTG_03998 [PUCCINIA graminis f. sp. tritici CRL 75-36-700-3]	XP_003322461	2.31113e-10
24135	0	5	0.350129	1	HYPOTHETICAL protein PGTG_04001 [PUCCINIA graminis f. sp. tritici CRL 75-36-700-3] >gi|309301454|gb|EFP78045.1| HYPOTHETICAL protein PGTG_04001 [PUCCINIA graminis f. sp. tritici CRL 75-36-700-3]	XP_003322464	6.17523e-08
24105	0	2	0.66493	1	HYPOTHETICAL protein PGTG_04016 [PUCCINIA graminis f. sp. tritici CRL 75-36-700-3] >gi|309301469|gb|EFP78060.1| HYPOTHETICAL protein PGTG_04016 [PUCCINIA graminis f. sp. tritici CRL 75-36-700-3]	XP_003322479	3.46879e-07
25826	0	4	0.430439	1	HYPOTHETICAL protein PGTG_04086 [PUCCINIA graminis f. sp. tritici CRL 75-36-700-3]	XP_003322549	5.59805e-19
24059	0	4	0.430439	1	HYPOTHETICAL protein PGTG_04156 [PUCCINIA graminis f. sp. tritici CRL 75-36-700-3] >gi|309301609|gb|EFP78200.1| HYPOTHETICAL protein PGTG_04156 [PUCCINIA graminis f. sp. tritici CRL 75-36-700-3]	XP_003322619	1.52742e-05
21448	0	9	0.15612	1	HYPOTHETICAL protein PGTG_04201 [PUCCINIA graminis f. sp. tritici CRL 75-36-700-3]	EFP78245	0.00287587
25201	0	5	0.350129	1	HYPOTHETICAL protein PGTG_04242 [PUCCINIA graminis f. sp. tritici CRL 75-36-700-3] >gi|309301695|gb|EFP78286.1| HYPOTHETICAL protein PGTG_04242 [PUCCINIA graminis f. sp. tritici CRL 75-36-700-3]	XP_003322705	2.7617e-08
22786	0	9	0.15612	1	HYPOTHETICAL protein PGTG_04246 [PUCCINIA graminis f. sp. tritici CRL 75-36-700-3] >gi|309301699|gb|EFP78290.1| HYPOTHETICAL protein PGTG_04246 [PUCCINIA graminis f. sp. tritici CRL 75-36-700-3]	XP_003322709	1.27309e-26
20942	0	2	0.66493	1	HYPOTHETICAL protein PGTG_04247 [PUCCINIA graminis f. sp. tritici CRL 75-36-700-3]	EFP78291	3.18886e-28
22505	0	3	0.530267	1	HYPOTHETICAL protein PGTG_04282 [PUCCINIA graminis f. sp. tritici CRL 75-36-700-3] >gi|309301735|gb|EFP78326.1| HYPOTHETICAL protein PGTG_04282 [PUCCINIA graminis f. sp. tritici CRL 75-36-700-3]	XP_003322745	1.97725e-07
26939	0	2	0.66493	1	HYPOTHETICAL protein PGTG_04287 [PUCCINIA graminis f. sp. tritici CRL 75-36-700-3]	EFP78331	5.02849e-11
21514	0	6	0.285179	1	HYPOTHETICAL protein PGTG_04321 [PUCCINIA graminis f. sp. tritici CRL 75-36-700-3] >gi|309301774|gb|EFP78365.1| HYPOTHETICAL protein PGTG_04321 [PUCCINIA graminis f. sp. tritici CRL 75-36-700-3]	XP_003322784	0.00623415
23110	0	6	0.285179	1	HYPOTHETICAL protein PGTG_04345 [PUCCINIA graminis f. sp. tritici CRL 75-36-700-3] >gi|309301798|gb|EFP78389.1| HYPOTHETICAL protein PGTG_04345 [PUCCINIA graminis f. sp. tritici CRL 75-36-700-3]	XP_003322808	1.5513e-11
21966	0	8	0.191526	1	HYPOTHETICAL protein PGTG_04383 [PUCCINIA graminis f. sp. tritici CRL 75-36-700-3] >gi|309301836|gb|EFP78427.1| HYPOTHETICAL protein PGTG_04383 [PUCCINIA graminis f. sp. tritici CRL 75-36-700-3]	XP_003322846	0.0206544
22824	0	11	0.102862	1	HYPOTHETICAL protein PGTG_04403 [PUCCINIA graminis f. sp. tritici CRL 75-36-700-3] >gi|309301856|gb|EFP78447.1| HYPOTHETICAL protein PGTG_04403 [PUCCINIA graminis f. sp. tritici CRL 75-36-700-3]	XP_003322866	0.00809778
20535	0	7	0.232934	1	HYPOTHETICAL protein PGTG_04479 [PUCCINIA graminis f. sp. tritici CRL 75-36-700-3]	EFP78523	6.3132e-53
26467	0	2	0.66493	1	HYPOTHETICAL protein PGTG_04483 [PUCCINIA graminis f. sp. tritici CRL 75-36-700-3]	EFP78527	5.27589e-11
26617	0	2	0.66493	1	HYPOTHETICAL protein PGTG_04522 [PUCCINIA graminis f. sp. tritici CRL 75-36-700-3]	EFP78566	3.81033e-35
24535	0	5	0.350129	1	HYPOTHETICAL protein PGTG_04698 [PUCCINIA graminis f. sp. tritici CRL 75-36-700-3] >gi|309302151|gb|EFP78742.1| NADH dehydrogenase (ubiquinone) 1 alpha subcomplex 6 [PUCCINIA graminis f. sp. tritici CRL 75-36-700-3]	XP_003323161	1.245e-58
22840	0	2	0.66493	1	HYPOTHETICAL protein PGTG_04701 [PUCCINIA graminis f. sp. tritici CRL 75-36-700-3] >gi|309302154|gb|EFP78745.1| high mobility group protein B1 [PUCCINIA graminis f. sp. tritici CRL 75-36-700-3]	XP_003323164	2.45735e-29
25922	0	3	0.530267	1	HYPOTHETICAL protein PGTG_04701 [PUCCINIA graminis f. sp. tritici CRL 75-36-700-3] >gi|309302154|gb|EFP78745.1| high mobility group protein B1 [PUCCINIA graminis f. sp. tritici CRL 75-36-700-3]	XP_003323164	3.41047e-37
25451	0	4	0.430439	1	HYPOTHETICAL protein PGTG_04759 [PUCCINIA graminis f. sp. tritici CRL 75-36-700-3] >gi|309302212|gb|EFP78803.1| HYPOTHETICAL protein PGTG_04759 [PUCCINIA graminis f. sp. tritici CRL 75-36-700-3]	XP_003323222	0.00494154
24044	0	6	0.285179	1	HYPOTHETICAL protein PGTG_04816 [PUCCINIA graminis f. sp. tritici CRL 75-36-700-3]	EFP78860	2.81761e-18
23509	0	3	0.530267	1	HYPOTHETICAL protein PGTG_04939 [PUCCINIA graminis f. sp. tritici CRL 75-36-700-3]	XP_003323402	2.22391e-08
22116	0	13	0.0683089	1	HYPOTHETICAL protein PGTG_04975 [PUCCINIA graminis f. sp. tritici CRL 75-36-700-3]	EFP79019	1.41307e-49
21772	0	9	0.15612	1	HYPOTHETICAL protein PGTG_05075 [PUCCINIA graminis f. sp. tritici CRL 75-36-700-3]	XP_003324269	0.000130912
26314	0	2	0.66493	1	HYPOTHETICAL protein PGTG_05215 [PUCCINIA graminis f. sp. tritici CRL 75-36-700-3] >gi|309303399|gb|EFP79990.1| HYPOTHETICAL protein PGTG_05215 [PUCCINIA graminis f. sp. tritici CRL 75-36-700-3]	XP_003324409	0.00211942
21226	0	3	0.530267	1	HYPOTHETICAL protein PGTG_05241 [PUCCINIA graminis f. sp. tritici CRL 75-36-700-3]	EFP80016	1.61713e-06
26516	0	2	0.66493	1	HYPOTHETICAL protein PGTG_05388 [PUCCINIA graminis f. sp. tritici CRL 75-36-700-3]	EFP80163	6.10159e-19
26026	0	3	0.530267	1	HYPOTHETICAL protein PGTG_05467 [PUCCINIA graminis f. sp. tritici CRL 75-36-700-3]	EFP79146	7.98718e-11
21386	0	2	0.66493	1	HYPOTHETICAL protein PGTG_05581 [PUCCINIA graminis f. sp. tritici CRL 75-36-700-3] >gi|309302669|gb|EFP79260.1| ubiquinol-cytochrome c reductase subunit 8 [PUCCINIA graminis f. sp. tritici CRL 75-36-700-3]	XP_003323679	2.01705e-39
24908	0	7	0.232934	1	HYPOTHETICAL protein PGTG_05973 [PUCCINIA graminis f. sp. tritici CRL 75-36-700-3] >gi|309303061|gb|EFP79652.1| HYPOTHETICAL protein PGTG_05973 [PUCCINIA graminis f. sp. tritici CRL 75-36-700-3]	XP_003324071	2.18209e-19
21819	0	6	0.285179	1	HYPOTHETICAL protein PGTG_06001 [PUCCINIA graminis f. sp. tritici CRL 75-36-700-3] >gi|309303089|gb|EFP79680.1| HYPOTHETICAL protein PGTG_06001 [PUCCINIA graminis f. sp. tritici CRL 75-36-700-3]	XP_003324099	5.60706e-28
21820	0	3	0.530267	1	HYPOTHETICAL protein PGTG_06001 [PUCCINIA graminis f. sp. tritici CRL 75-36-700-3] >gi|309303089|gb|EFP79680.1| HYPOTHETICAL protein PGTG_06001 [PUCCINIA graminis f. sp. tritici CRL 75-36-700-3]	XP_003324099	37.6123
26797	0	6	0.285179	1	HYPOTHETICAL protein PGTG_06044 [PUCCINIA graminis f. sp. tritici CRL 75-36-700-3]	EFP79723	5.61164e-17
24621	0	2	0.66493	1	HYPOTHETICAL protein PGTG_06267 [PUCCINIA graminis f. sp. tritici CRL 75-36-700-3] >gi|309303720|gb|EFP80311.1| HYPOTHETICAL protein PGTG_06267 [PUCCINIA graminis f. sp. tritici CRL 75-36-700-3]	XP_003324730	3.5926e-13
26689	0	3	0.530267	1	HYPOTHETICAL protein PGTG_06288 [PUCCINIA graminis f. sp. tritici CRL 75-36-700-3]	EFP80332	1.33466e-19
25752	0	7	0.232934	1	HYPOTHETICAL protein PGTG_06313 [PUCCINIA graminis f. sp. tritici CRL 75-36-700-3] >gi|309303766|gb|EFP80357.1| HYPOTHETICAL protein PGTG_06313 [PUCCINIA graminis f. sp. tritici CRL 75-36-700-3]	XP_003324776	5.34081e-17
22428	0	2	0.66493	1	HYPOTHETICAL protein PGTG_06364 [PUCCINIA graminis f. sp. tritici CRL 75-36-700-3] >gi|309303817|gb|EFP80408.1| uracil phosphoribosyltransferase [PUCCINIA graminis f. sp. tritici CRL 75-36-700-3] >gi|375164885|gb|EFP93315.2| uracil phosphoribosyltransferase [PUCCINIA graminis f. sp. tritici CRL 75-36-700-3]	XP_003324827	3.4875e-19
22852	0	4	0.430439	1	HYPOTHETICAL protein PGTG_06530 [PUCCINIA graminis f. sp. tritici CRL 75-36-700-3]	EFP80574	5.55703e-30
25749	0	2	0.66493	1	HYPOTHETICAL protein PGTG_06612 [PUCCINIA graminis f. sp. tritici CRL 75-36-700-3]	XP_003325075	5.6347e-26
24869	0	2	0.66493	1	HYPOTHETICAL protein PGTG_06628 [PUCCINIA graminis f. sp. tritici CRL 75-36-700-3] >gi|309304081|gb|EFP80672.1| HYPOTHETICAL protein PGTG_06628 [PUCCINIA graminis f. sp. tritici CRL 75-36-700-3]	XP_003325091	7.92243e-13
25932	0	5	0.350129	1	HYPOTHETICAL protein PGTG_06640 [PUCCINIA graminis f. sp. tritici CRL 75-36-700-3] >gi|309304093|gb|EFP80684.1| HYPOTHETICAL protein PGTG_06640 [PUCCINIA graminis f. sp. tritici CRL 75-36-700-3]	XP_003325103	2.63437e-05
26110	0	2	0.66493	1	HYPOTHETICAL protein PGTG_06668 [PUCCINIA graminis f. sp. tritici CRL 75-36-700-3] >gi|309304121|gb|EFP80712.1| HYPOTHETICAL protein PGTG_06668 [PUCCINIA graminis f. sp. tritici CRL 75-36-700-3]	XP_003325131	4.10715e-17
22152	0	9	0.15612	1	HYPOTHETICAL protein PGTG_06858 [PUCCINIA graminis f. sp. tritici CRL 75-36-700-3]	XP_003325656	0.0741625
15169	0	3	0.530267	1	HYPOTHETICAL protein PGTG_06901 [PUCCINIA graminis f. sp. tritici CRL 75-36-700-3]	EFP81280	7.73934
24094	0	6	0.285179	1	HYPOTHETICAL protein PGTG_07068 [PUCCINIA graminis f. sp. tritici CRL 75-36-700-3]	XP_003325866	4.02763e-20
22384	0	11	0.102862	1	HYPOTHETICAL protein PGTG_07097 [PUCCINIA graminis f. sp. tritici CRL 75-36-700-3] >gi|309304254|gb|EFP80845.1| HYPOTHETICAL protein PGTG_07097 [PUCCINIA graminis f. sp. tritici CRL 75-36-700-3]	XP_003325264	1.69505e-25
21015	0	4	0.430439	1	HYPOTHETICAL protein PGTG_07128 [PUCCINIA graminis f. sp. tritici CRL 75-36-700-3]	EFP80876	2.5923e-23
24303	0	3	0.530267	1	HYPOTHETICAL protein PGTG_07128 [PUCCINIA graminis f. sp. tritici CRL 75-36-700-3]	EFP80876	1.78893e-06
21833	0	3	0.530267	1	HYPOTHETICAL protein PGTG_07153 [PUCCINIA graminis f. sp. tritici CRL 75-36-700-3]	XP_003325320	1.03978e-15
26010	0	4	0.430439	1	HYPOTHETICAL protein PGTG_07155 [PUCCINIA graminis f. sp. tritici CRL 75-36-700-3]	EFP80903	0.110556
20549	0	6	0.285179	1	HYPOTHETICAL protein PGTG_07172 [PUCCINIA graminis f. sp. tritici CRL 75-36-700-3]	XP_003325339	0.456518
22313	0	5	0.350129	1	HYPOTHETICAL protein PGTG_07201 [PUCCINIA graminis f. sp. tritici CRL 75-36-700-3]	EFP80949	5.60427e-27
22849	0	7	0.232934	1	HYPOTHETICAL protein PGTG_07221 [PUCCINIA graminis f. sp. tritici CRL 75-36-700-3] >gi|309304378|gb|EFP80969.1| HYPOTHETICAL protein PGTG_07221 [PUCCINIA graminis f. sp. tritici CRL 75-36-700-3]	XP_003325388	24.8822
24820	0	2	0.66493	1	HYPOTHETICAL protein PGTG_07269 [PUCCINIA graminis f. sp. tritici CRL 75-36-700-3] >gi|309304426|gb|EFP81017.1| U6 snRNA-associated Sm-like protein LSm3 [PUCCINIA graminis f. sp. tritici CRL 75-36-700-3]	XP_003325436	6.41429e-20
23872	0	3	0.530267	1	HYPOTHETICAL protein PGTG_07313 [PUCCINIA graminis f. sp. tritici CRL 75-36-700-3] >gi|309304470|gb|EFP81061.1| HYPOTHETICAL protein PGTG_07313 [PUCCINIA graminis f. sp. tritici CRL 75-36-700-3]	XP_003325480	7.43202e-42
24954	0	3	0.530267	1	HYPOTHETICAL protein PGTG_07315 [PUCCINIA graminis f. sp. tritici CRL 75-36-700-3] >gi|309304472|gb|EFP81063.1| HYPOTHETICAL protein PGTG_07315 [PUCCINIA graminis f. sp. tritici CRL 75-36-700-3]	XP_003325482	7.37878e-12
23796	0	7	0.232934	1	HYPOTHETICAL protein PGTG_07362 [PUCCINIA graminis f. sp. tritici CRL 75-36-700-3]	EFP81110	5.64715e-23
23773	0	6	0.285179	1	HYPOTHETICAL protein PGTG_07385 [PUCCINIA graminis f. sp. tritici CRL 75-36-700-3] >gi|309304542|gb|EFP81133.1| HYPOTHETICAL protein PGTG_07385 [PUCCINIA graminis f. sp. tritici CRL 75-36-700-3]	XP_003325552	6.14602e-28
22833	0	5	0.350129	1	HYPOTHETICAL protein PGTG_07409 [PUCCINIA graminis f. sp. tritici CRL 75-36-700-3] >gi|309304566|gb|EFP81157.1| HYPOTHETICAL protein PGTG_07409 [PUCCINIA graminis f. sp. tritici CRL 75-36-700-3]	XP_003325576	3.68186e-26
23629	0	4	0.430439	1	HYPOTHETICAL protein PGTG_07666 [PUCCINIA graminis f. sp. tritici CRL 75-36-700-3] >gi|309305678|gb|EFP82269.1| HYPOTHETICAL protein PGTG_07666 [PUCCINIA graminis f. sp. tritici CRL 75-36-700-3]	XP_003326688	9.05468e-22
22968	0	2	0.66493	1	HYPOTHETICAL protein PGTG_07699 [PUCCINIA graminis f. sp. tritici CRL 75-36-700-3] >gi|309305711|gb|EFP82302.1| H/ACA ribonucleoprotein complex subunit 3 [PUCCINIA graminis f. sp. tritici CRL 75-36-700-3]	XP_003326721	1.37545e-25
26492	0	2	0.66493	1	HYPOTHETICAL protein PGTG_07766 [PUCCINIA graminis f. sp. tritici CRL 75-36-700-3]	XP_003325936	3.9093e-14
23402	0	11	0.102862	1	HYPOTHETICAL protein PGTG_07874 [PUCCINIA graminis f. sp. tritici CRL 75-36-700-3] >gi|309305034|gb|EFP81625.1| HYPOTHETICAL protein PGTG_07874 [PUCCINIA graminis f. sp. tritici CRL 75-36-700-3]	XP_003326044	9.03143e-08
22886	0	5	0.350129	1	HYPOTHETICAL protein PGTG_07877 [PUCCINIA graminis f. sp. tritici CRL 75-36-700-3]	EFP81628	1.25792e-33
25173	0	3	0.530267	1	HYPOTHETICAL protein PGTG_07920 [PUCCINIA graminis f. sp. tritici CRL 75-36-700-3] >gi|309305080|gb|EFP81671.1| protein transporter Sec61 subunit gamma [PUCCINIA graminis f. sp. tritici CRL 75-36-700-3]	XP_003326090	1.41016e-26
24975	0	3	0.530267	1	HYPOTHETICAL protein PGTG_08005 [PUCCINIA graminis f. sp. tritici CRL 75-36-700-3] >gi|309305165|gb|EFP81756.1| HYPOTHETICAL protein PGTG_08005 [PUCCINIA graminis f. sp. tritici CRL 75-36-700-3]	XP_003326175	5.76476
25988	0	1	1	1	HYPOTHETICAL protein PGTG_08005 [PUCCINIA graminis f. sp. tritici CRL 75-36-700-3] >gi|309305165|gb|EFP81756.1| HYPOTHETICAL protein PGTG_08005 [PUCCINIA graminis f. sp. tritici CRL 75-36-700-3]	XP_003326175	2.06451e-35
26336	0	4	0.430439	1	HYPOTHETICAL protein PGTG_08005 [PUCCINIA graminis f. sp. tritici CRL 75-36-700-3] >gi|309305165|gb|EFP81756.1| HYPOTHETICAL protein PGTG_08005 [PUCCINIA graminis f. sp. tritici CRL 75-36-700-3]	XP_003326175	9.27918e-31
21608	0	3	0.530267	1	HYPOTHETICAL protein PGTG_08173 [PUCCINIA graminis f. sp. tritici CRL 75-36-700-3]	XP_003326343	1.06545e-29
21904	0	10	0.126722	1	HYPOTHETICAL protein PGTG_08247 [PUCCINIA graminis f. sp. tritici CRL 75-36-700-3]	XP_003326417	7.32662e-20
22472	0	6	0.285179	1	HYPOTHETICAL protein PGTG_08311 [PUCCINIA graminis f. sp. tritici CRL 75-36-700-3] >gi|309305764|gb|EFP82355.1| 60S RIBOSOMAL protein L37-A [PUCCINIA graminis f. sp. tritici CRL 75-36-700-3]	XP_003326774	3.79672e-39
21198	0	13	0.0683089	1	HYPOTHETICAL protein PGTG_08344 [PUCCINIA graminis f. sp. tritici CRL 75-36-700-3]	EFP82388	2.64437e-25
22137	0	2	0.66493	1	HYPOTHETICAL protein PGTG_08344 [PUCCINIA graminis f. sp. tritici CRL 75-36-700-3]	EFP82388	0.0343315
22150	0	4	0.430439	1	HYPOTHETICAL protein PGTG_08344 [PUCCINIA graminis f. sp. tritici CRL 75-36-700-3]	EFP82388	0.0444462
24341	0	4	0.430439	1	HYPOTHETICAL protein PGTG_08600 [PUCCINIA graminis f. sp. tritici CRL 75-36-700-3] >gi|309306823|gb|EFP83414.1| HYPOTHETICAL protein PGTG_08600 [PUCCINIA graminis f. sp. tritici CRL 75-36-700-3]	XP_003327833	9.82822e-08
10285	0	1	1	1	HYPOTHETICAL protein PGTG_08738 [PUCCINIA graminis f. sp. tritici CRL 75-36-700-3]	EFP83552	5.52833e-12
24313	0	5	0.350129	1	HYPOTHETICAL protein PGTG_08821 [PUCCINIA graminis f. sp. tritici CRL 75-36-700-3] >gi|309306034|gb|EFP82625.1| HYPOTHETICAL protein PGTG_08821 [PUCCINIA graminis f. sp. tritici CRL 75-36-700-3]	XP_003327044	1.85058e-30
21862	0	3	0.530267	1	HYPOTHETICAL protein PGTG_09045 [PUCCINIA graminis f. sp. tritici CRL 75-36-700-3]	XP_003327511	1.34084e-25
22460	0	2	0.66493	1	HYPOTHETICAL protein PGTG_09048 [PUCCINIA graminis f. sp. tritici CRL 75-36-700-3] >gi|309306504|gb|EFP83095.1| ATP synthase F1, epsilon subunit [PUCCINIA graminis f. sp. tritici CRL 75-36-700-3]	XP_003327514	5.72829e-48
20661	0	11	0.102862	1	HYPOTHETICAL protein PGTG_09123 [PUCCINIA graminis f. sp. tritici CRL 75-36-700-3] >gi|309306579|gb|EFP83170.1| HYPOTHETICAL protein PGTG_09123 [PUCCINIA graminis f. sp. tritici CRL 75-36-700-3]	XP_003327589	6.79903e-12
25315	0	4	0.430439	1	HYPOTHETICAL protein PGTG_09124 [PUCCINIA graminis f. sp. tritici CRL 75-36-700-3] >gi|309306580|gb|EFP83171.1| HYPOTHETICAL protein PGTG_09124 [PUCCINIA graminis f. sp. tritici CRL 75-36-700-3]	XP_003327590	1.83599e-09
21316	0	3	0.530267	1	HYPOTHETICAL protein PGTG_09139 [PUCCINIA graminis f. sp. tritici CRL 75-36-700-3]	EFP83186	4.80721e-24
22161	0	3	0.530267	1	HYPOTHETICAL protein PGTG_09194 [PUCCINIA graminis f. sp. tritici CRL 75-36-700-3] >gi|309306650|gb|EFP83241.1| HYPOTHETICAL protein PGTG_09194 [PUCCINIA graminis f. sp. tritici CRL 75-36-700-3]	XP_003327660	6.24824e-38
25268	0	10	0.126722	1	HYPOTHETICAL protein PGTG_09196 [PUCCINIA graminis f. sp. tritici CRL 75-36-700-3] >gi|309306652|gb|EFP83243.1| HYPOTHETICAL protein PGTG_09196 [PUCCINIA graminis f. sp. tritici CRL 75-36-700-3]	XP_003327662	7.14681e-28
22552	0	6	0.285179	1	HYPOTHETICAL protein PGTG_09197 [PUCCINIA graminis f. sp. tritici CRL 75-36-700-3]	EFP83244	4.74129e-10
21026	0	6	0.285179	1	HYPOTHETICAL protein PGTG_09220 [PUCCINIA graminis f. sp. tritici CRL 75-36-700-3]	EFP83267	1.74972e-09
25413	0	6	0.285179	1	HYPOTHETICAL protein PGTG_09288 [PUCCINIA graminis f. sp. tritici CRL 75-36-700-3] >gi|309306984|gb|EFP83575.1| HYPOTHETICAL protein PGTG_09288 [PUCCINIA graminis f. sp. tritici CRL 75-36-700-3]	XP_003327994	0.00994477
23271	0	3	0.530267	1	HYPOTHETICAL protein PGTG_09401 [PUCCINIA graminis f. sp. tritici CRL 75-36-700-3]	EFP83688	2.04024e-38
20581	0	11	0.102862	1	HYPOTHETICAL protein PGTG_09489 [PUCCINIA graminis f. sp. tritici CRL 75-36-700-3]	XP_003328195	1.29931e-67
23003	0	4	0.430439	1	HYPOTHETICAL protein PGTG_09510 [PUCCINIA graminis f. sp. tritici CRL 75-36-700-3]	EFP83797	3.10215e-43
25541	0	4	0.430439	1	HYPOTHETICAL protein PGTG_09714 [PUCCINIA graminis f. sp. tritici CRL 75-36-700-3]	EFP84001	2.57719e-51
25847	0	2	0.66493	1	HYPOTHETICAL protein PGTG_09726 [PUCCINIA graminis f. sp. tritici CRL 75-36-700-3]	XP_003328432	3.42275e-16
24654	0	4	0.430439	1	HYPOTHETICAL protein PGTG_09765 [PUCCINIA graminis f. sp. tritici CRL 75-36-700-3]	EFP84052	0.177991
20608	0	9	0.15612	1	HYPOTHETICAL protein PGTG_09766 [PUCCINIA graminis f. sp. tritici CRL 75-36-700-3] >gi|309307462|gb|EFP84053.1| ATP synthase (E/31 kDa) subunit [PUCCINIA graminis f. sp. tritici CRL 75-36-700-3]	XP_003328472	7.6909e-15
21600	0	7	0.232934	1	HYPOTHETICAL protein PGTG_09769 [PUCCINIA graminis f. sp. tritici CRL 75-36-700-3] >gi|309307465|gb|EFP84056.1| HYPOTHETICAL protein PGTG_09769 [PUCCINIA graminis f. sp. tritici CRL 75-36-700-3]	XP_003328475	4.45397
21827	0	4	0.430439	1	HYPOTHETICAL protein PGTG_09773 [PUCCINIA graminis f. sp. tritici CRL 75-36-700-3]	EFP84060	53.5439
26209	0	3	0.530267	1	HYPOTHETICAL protein PGTG_09896 [PUCCINIA graminis f. sp. tritici CRL 75-36-700-3]	EFP82928	0.640133
23596	0	8	0.191526	1	HYPOTHETICAL protein PGTG_10082 [PUCCINIA graminis f. sp. tritici CRL 75-36-700-3] >gi|309307771|gb|EFP84362.1| HYPOTHETICAL protein PGTG_10082 [PUCCINIA graminis f. sp. tritici CRL 75-36-700-3]	XP_003328781	0.000188936
26737	0	2	0.66493	1	HYPOTHETICAL protein PGTG_10141 [PUCCINIA graminis f. sp. tritici CRL 75-36-700-3]	EFP84421	1.24844e-40
23069	0	5	0.350129	1	HYPOTHETICAL protein PGTG_10225 [PUCCINIA graminis f. sp. tritici CRL 75-36-700-3]	EFP84505	24.7189
22159	0	1	1	1	HYPOTHETICAL protein PGTG_10268 [PUCCINIA graminis f. sp. tritici CRL 75-36-700-3]	EFP84797	2.34239e-07
25467	0	4	0.430439	1	HYPOTHETICAL protein PGTG_10268 [PUCCINIA graminis f. sp. tritici CRL 75-36-700-3]	EFP84797	1.78511e-13
26436	0	2	0.66493	1	HYPOTHETICAL protein PGTG_10272 [PUCCINIA graminis f. sp. tritici CRL 75-36-700-3] >gi|309308210|gb|EFP84801.1| HYPOTHETICAL protein PGTG_10272 [PUCCINIA graminis f. sp. tritici CRL 75-36-700-3]	XP_003329220	4.16515e-06
21222	0	6	0.285179	1	HYPOTHETICAL protein PGTG_10415 [PUCCINIA graminis f. sp. tritici CRL 75-36-700-3]	EFP84944	0.0520573
21518	0	7	0.232934	1	HYPOTHETICAL protein PGTG_10468 [PUCCINIA graminis f. sp. tritici CRL 75-36-700-3] >gi|309307499|gb|EFP84090.1| citrate synthase [PUCCINIA graminis f. sp. tritici CRL 75-36-700-3]	XP_003328509	3.08605e-51
24216	0	7	0.232934	1	HYPOTHETICAL protein PGTG_10476 [PUCCINIA graminis f. sp. tritici CRL 75-36-700-3] >gi|309307507|gb|EFP84098.1| HYPOTHETICAL protein PGTG_10476 [PUCCINIA graminis f. sp. tritici CRL 75-36-700-3]	XP_003328517	2.56147e-49
22917	0	2	0.66493	1	HYPOTHETICAL protein PGTG_10546 [PUCCINIA graminis f. sp. tritici CRL 75-36-700-3] >gi|309307577|gb|EFP84168.1| HYPOTHETICAL protein PGTG_10546 [PUCCINIA graminis f. sp. tritici CRL 75-36-700-3]	XP_003328587	1.78801
24021	0	2	0.66493	1	HYPOTHETICAL protein PGTG_10559 [PUCCINIA graminis f. sp. tritici CRL 75-36-700-3]	XP_003328600	1.00301e-34
26586	0	2	0.66493	1	HYPOTHETICAL protein PGTG_10560 [PUCCINIA graminis f. sp. tritici CRL 75-36-700-3]	EFP84182	0.000193135
23316	0	8	0.191526	1	HYPOTHETICAL protein PGTG_10595 [PUCCINIA graminis f. sp. tritici CRL 75-36-700-3]	EFP84217	1.38794e-14
21599	0	2	0.66493	1	HYPOTHETICAL protein PGTG_10627 [PUCCINIA graminis f. sp. tritici CRL 75-36-700-3] >gi|309307658|gb|EFP84249.1| HYPOTHETICAL protein PGTG_10627 [PUCCINIA graminis f. sp. tritici CRL 75-36-700-3]	XP_003328668	1.84475e-08
25557	0	4	0.430439	1	HYPOTHETICAL protein PGTG_10639 [PUCCINIA graminis f. sp. tritici CRL 75-36-700-3] >gi|363805508|sp|E3KIY6.1|RU1C2_PUCGT RecName: Full=U1 small nuclear ribonucleoprotein C-2; Short=U1 snRNP C-2; Short=U1-C-2; Short=U1C-2 >gi|309307670|gb|EFP84261.1| U1 small nuclear ribonucleoprotein C [PUCCINIA graminis f. sp. tritici CRL 75-36-700-3]	XP_003328680	3.02603e-11
26019	0	5	0.350129	1	HYPOTHETICAL protein PGTG_10856 [PUCCINIA graminis f. sp. tritici CRL 75-36-700-3]	EFP84697	2.13644e-10
26863	0	2	0.66493	1	HYPOTHETICAL protein PGTG_10873 [PUCCINIA graminis f. sp. tritici CRL 75-36-700-3] >gi|309308123|gb|EFP84714.1| HYPOTHETICAL protein PGTG_10873 [PUCCINIA graminis f. sp. tritici CRL 75-36-700-3]	XP_003329133	0.0447559
22921	0	3	0.530267	1	HYPOTHETICAL protein PGTG_11020 [PUCCINIA graminis f. sp. tritici CRL 75-36-700-3]	XP_003330110	1.68631e-27
23526	0	12	0.0835669	1	HYPOTHETICAL protein PGTG_11068 [PUCCINIA graminis f. sp. tritici CRL 75-36-700-3] >gi|309309148|gb|EFP85739.1| S25 RIBOSOMAL protein [PUCCINIA graminis f. sp. tritici CRL 75-36-700-3]	XP_003330158	5.32152e-45
23989	0	3	0.530267	1	HYPOTHETICAL protein PGTG_11078 [PUCCINIA graminis f. sp. tritici CRL 75-36-700-3]	XP_003330168	1.79871e-16
23957	0	2	0.66493	1	HYPOTHETICAL protein PGTG_11130 [PUCCINIA graminis f. sp. tritici CRL 75-36-700-3] >gi|309309210|gb|EFP85801.1| HYPOTHETICAL protein PGTG_11130 [PUCCINIA graminis f. sp. tritici CRL 75-36-700-3]	XP_003330220	1.95278e-17
25533	0	2	0.66493	1	HYPOTHETICAL protein PGTG_11230 [PUCCINIA graminis f. sp. tritici CRL 75-36-700-3] >gi|309308470|gb|EFP85061.1| HYPOTHETICAL protein PGTG_11230 [PUCCINIA graminis f. sp. tritici CRL 75-36-700-3]	XP_003329480	2.26104e-17
6631	0	6	0.285179	1	HYPOTHETICAL protein PGTG_11232 [PUCCINIA graminis f. sp. tritici CRL 75-36-700-3] >gi|309308472|gb|EFP85063.1| cytochrome c oxidase subunit XVII assembly protein [PUCCINIA graminis f. sp. tritici CRL 75-36-700-3]	XP_003329482	3.01512e-19
23554	0	2	0.66493	1	HYPOTHETICAL protein PGTG_11233 [PUCCINIA graminis f. sp. tritici CRL 75-36-700-3]	XP_003329483	7.32631e-16
24645	0	3	0.530267	1	HYPOTHETICAL protein PGTG_11305 [PUCCINIA graminis f. sp. tritici CRL 75-36-700-3]	EFP85136	2.29029e-45
22050	0	6	0.285179	1	HYPOTHETICAL protein PGTG_11403 [PUCCINIA graminis f. sp. tritici CRL 75-36-700-3]	EFP85234	3.91566e-11
21113	0	3	0.530267	1	HYPOTHETICAL protein PGTG_11420 [PUCCINIA graminis f. sp. tritici CRL 75-36-700-3]	EFP85251	1.01944e-06
20899	0	3	0.530267	1	HYPOTHETICAL protein PGTG_11633 [PUCCINIA graminis f. sp. tritici CRL 75-36-700-3]	EFP85877	0.00536787
22808	0	3	0.530267	1	HYPOTHETICAL protein PGTG_11681 [PUCCINIA graminis f. sp. tritici CRL 75-36-700-3] >gi|309309334|gb|EFP85925.1| HYPOTHETICAL protein PGTG_11681 [PUCCINIA graminis f. sp. tritici CRL 75-36-700-3]	XP_003330344	7.63891e-17
23964	0	2	0.66493	1	HYPOTHETICAL protein PGTG_11823 [PUCCINIA graminis f. sp. tritici CRL 75-36-700-3]	EFP85467	0.000117386
21818	0	10	0.126722	1	HYPOTHETICAL protein PGTG_12063 [PUCCINIA graminis f. sp. tritici CRL 75-36-700-3] >gi|309309516|gb|EFP86107.1| large subunit RIBOSOMAL protein L18e [PUCCINIA graminis f. sp. tritici CRL 75-36-700-3]	XP_003330526	1.26449e-55
26416	0	1	1	1	HYPOTHETICAL protein PGTG_12063 [PUCCINIA graminis f. sp. tritici CRL 75-36-700-3] >gi|309309516|gb|EFP86107.1| large subunit RIBOSOMAL protein L18e [PUCCINIA graminis f. sp. tritici CRL 75-36-700-3]	XP_003330526	4.9263e-26
26465	0	6	0.285179	1	HYPOTHETICAL protein PGTG_12065 [PUCCINIA graminis f. sp. tritici CRL 75-36-700-3]	XP_003330528	0.000508094
23955	0	2	0.66493	1	HYPOTHETICAL protein PGTG_12275 [PUCCINIA graminis f. sp. tritici CRL 75-36-700-3]	EFP86319	1.99652e-05
22203	0	2	0.66493	1	HYPOTHETICAL protein PGTG_12616 [PUCCINIA graminis f. sp. tritici CRL 75-36-700-3] >gi|309310284|gb|EFP86875.1| HYPOTHETICAL protein PGTG_12616 [PUCCINIA graminis f. sp. tritici CRL 75-36-700-3]	XP_003331294	0.000927139
22698	0	2	0.66493	1	HYPOTHETICAL protein PGTG_12617 [PUCCINIA graminis f. sp. tritici CRL 75-36-700-3] >gi|309310285|gb|EFP86876.1| HYPOTHETICAL protein PGTG_12617 [PUCCINIA graminis f. sp. tritici CRL 75-36-700-3]	XP_003331295	5.652e-22
25875	0	2	0.66493	1	HYPOTHETICAL protein PGTG_12653 [PUCCINIA graminis f. sp. tritici CRL 75-36-700-3]	EFP86912	9.60168e-22
23682	0	3	0.530267	1	HYPOTHETICAL protein PGTG_12664 [PUCCINIA graminis f. sp. tritici CRL 75-36-700-3] >gi|331252353|ref|XP_003338736.1| HYPOTHETICAL protein PGTG_20271 [PUCCINIA graminis f. sp. tritici CRL 75-36-700-3] >gi|309317726|gb|EFP94317.1| HYPOTHETICAL protein PGTG_20271 [PUCCINIA graminis f. sp. tritici CRL 75-36-700-3] >gi|375169748|gb|EHS63957.1| HYPOTHETICAL protein PGTG_21911 [PUCCINIA graminis f. sp. …	XP_003331342	2.4847e-05
21086	0	14	0.0560289	1	HYPOTHETICAL protein PGTG_12674 [PUCCINIA graminis f. sp. tritici CRL 75-36-700-3] >gi|309310342|gb|EFP86933.1| HYPOTHETICAL protein PGTG_12674 [PUCCINIA graminis f. sp. tritici CRL 75-36-700-3]	XP_003331352	6.7959e-09
16128	0	5	0.350129	1	HYPOTHETICAL protein PGTG_12706 [PUCCINIA graminis f. sp. tritici CRL 75-36-700-3] >gi|309310374|gb|EFP86965.1| cell division cycle protein 48 [PUCCINIA graminis f. sp. tritici CRL 75-36-700-3]	XP_003331384	8.82178e-17
22879	0	10	0.126722	1	HYPOTHETICAL protein PGTG_12718 [PUCCINIA graminis f. sp. tritici CRL 75-36-700-3]	XP_003331396	3.98623e-13
21371	0	8	0.191526	1	HYPOTHETICAL protein PGTG_12722 [PUCCINIA graminis f. sp. tritici CRL 75-36-700-3] >gi|309310390|gb|EFP86981.1| cytochrome c oxidase subunit VIb [PUCCINIA graminis f. sp. tritici CRL 75-36-700-3]	XP_003331400	9.35124e-13
23188	0	3	0.530267	1	HYPOTHETICAL protein PGTG_12747 [PUCCINIA graminis f. sp. tritici CRL 75-36-700-3] >gi|309310415|gb|EFP87006.1| HYPOTHETICAL protein PGTG_12747 [PUCCINIA graminis f. sp. tritici CRL 75-36-700-3]	XP_003331425	3.13045
21894	0	2	0.66493	1	HYPOTHETICAL protein PGTG_12810 [PUCCINIA graminis f. sp. tritici CRL 75-36-700-3] >gi|309310635|gb|EFP87226.1| HYPOTHETICAL protein PGTG_12810 [PUCCINIA graminis f. sp. tritici CRL 75-36-700-3]	XP_003331645	37.9316
21469	0	8	0.191526	1	HYPOTHETICAL protein PGTG_12848 [PUCCINIA graminis f. sp. tritici CRL 75-36-700-3]	EFP87264	9.27868e-20
23791	0	8	0.191526	1	HYPOTHETICAL protein PGTG_12969 [PUCCINIA graminis f. sp. tritici CRL 75-36-700-3]	EFP86587	3.17463e-13
26085	0	2	0.66493	1	HYPOTHETICAL protein PGTG_13016 [PUCCINIA graminis f. sp. tritici CRL 75-36-700-3]	EFP86634	0.151646
26025	0	3	0.530267	1	HYPOTHETICAL protein PGTG_13019 [PUCCINIA graminis f. sp. tritici CRL 75-36-700-3]	EFP86637	2.34779e-29
25356	0	3	0.530267	1	HYPOTHETICAL protein PGTG_13047 [PUCCINIA graminis f. sp. tritici CRL 75-36-700-3] >gi|331249105|ref|XP_003337172.1| HYPOTHETICAL protein PGTG_18772 [PUCCINIA graminis f. sp. tritici CRL 75-36-700-3] >gi|309310074|gb|EFP86665.1| NADH dehydrogenase (ubiquinone) 1 alpha/beta subcomplex 1 [PUCCINIA graminis f. sp. tritici CRL 75-36-700-3] >gi|309316162|gb|EFP92753.1| NADH dehydrogenase (ubiquinone) …	XP_003331084	8.93007e-28
23980	0	2	0.66493	1	HYPOTHETICAL protein PGTG_13103 [PUCCINIA graminis f. sp. tritici CRL 75-36-700-3] >gi|309310130|gb|EFP86721.1| HYPOTHETICAL protein PGTG_13103 [PUCCINIA graminis f. sp. tritici CRL 75-36-700-3]	XP_003331140	5.50845e-09
22167	0	2	0.66493	1	HYPOTHETICAL protein PGTG_13172 [PUCCINIA graminis f. sp. tritici CRL 75-36-700-3]	EFP86790	1.15464e-10
22154	0	6	0.285179	1	HYPOTHETICAL protein PGTG_13402 [PUCCINIA graminis f. sp. tritici CRL 75-36-700-3]	EFP87183	2.14237e-16
22414	0	5	0.350129	1	HYPOTHETICAL protein PGTG_13475 [PUCCINIA graminis f. sp. tritici CRL 75-36-700-3] >gi|309311098|gb|EFP87689.1| V-type H+-transporting ATPase 16kDa proteolipid subunit [PUCCINIA graminis f. sp. tritici CRL 75-36-700-3]	XP_003332108	4.64237e-33
21945	0	4	0.430439	1	HYPOTHETICAL protein PGTG_13505 [PUCCINIA graminis f. sp. tritici CRL 75-36-700-3]	EFP87719	8.28728e-61
20872	0	4	0.430439	1	HYPOTHETICAL protein PGTG_13575 [PUCCINIA graminis f. sp. tritici CRL 75-36-700-3] >gi|309310756|gb|EFP87347.1| HYPOTHETICAL protein PGTG_13575 [PUCCINIA graminis f. sp. tritici CRL 75-36-700-3]	XP_003331766	7.70219e-21
26170	0	2	0.66493	1	HYPOTHETICAL protein PGTG_13700 [PUCCINIA graminis f. sp. tritici CRL 75-36-700-3] >gi|309310881|gb|EFP87472.1| HYPOTHETICAL protein PGTG_13700 [PUCCINIA graminis f. sp. tritici CRL 75-36-700-3]	XP_003331891	3.54662
22975	0	6	0.285179	1	HYPOTHETICAL protein PGTG_13756 [PUCCINIA graminis f. sp. tritici CRL 75-36-700-3] >gi|309311361|gb|EFP87952.1| HYPOTHETICAL protein PGTG_13756 [PUCCINIA graminis f. sp. tritici CRL 75-36-700-3]	XP_003332371	1.14272e-59
25549	0	3	0.530267	1	HYPOTHETICAL protein PGTG_13771 [PUCCINIA graminis f. sp. tritici CRL 75-36-700-3]	EFP87967	4.24385e-62
24222	0	5	0.350129	1	HYPOTHETICAL protein PGTG_13954 [PUCCINIA graminis f. sp. tritici CRL 75-36-700-3]	EFP87583	9.18987e-26
24431	0	9	0.15612	1	HYPOTHETICAL protein PGTG_14034 [PUCCINIA graminis f. sp. tritici CRL 75-36-700-3] >gi|309311865|gb|EFP88456.1| ATPase GET3 [PUCCINIA graminis f. sp. tritici CRL 75-36-700-3]	XP_003332875	9.82268e-59
23832	0	5	0.350129	1	HYPOTHETICAL protein PGTG_14181 [PUCCINIA graminis f. sp. tritici CRL 75-36-700-3]	EFP88842	2.14627e-36
23421	0	3	0.530267	1	HYPOTHETICAL protein PGTG_14197 [PUCCINIA graminis f. sp. tritici CRL 75-36-700-3]	EFP88858	3.19282e-10
21456	0	13	0.0683089	1	HYPOTHETICAL protein PGTG_14201 [PUCCINIA graminis f. sp. tritici CRL 75-36-700-3] >gi|309312271|gb|EFP88862.1| HYPOTHETICAL protein PGTG_14201 [PUCCINIA graminis f. sp. tritici CRL 75-36-700-3]	XP_003333281	1.7009e-27
25239	0	5	0.350129	1	HYPOTHETICAL protein PGTG_14261 [PUCCINIA graminis f. sp. tritici CRL 75-36-700-3] >gi|309311586|gb|EFP88177.1| maf-like protein [PUCCINIA graminis f. sp. tritici CRL 75-36-700-3]	XP_003332596	7.89793e-13
23258	0	3	0.530267	1	HYPOTHETICAL protein PGTG_14273 [PUCCINIA graminis f. sp. tritici CRL 75-36-700-3]	EFP88189	6.28787e-15
26389	0	3	0.530267	1	HYPOTHETICAL protein PGTG_14287 [PUCCINIA graminis f. sp. tritici CRL 75-36-700-3]	EFP88203	1.94007e-25
26736	0	2	0.66493	1	HYPOTHETICAL protein PGTG_14589 [PUCCINIA graminis f. sp. tritici CRL 75-36-700-3]	XP_003332293	4.1588e-07
26050	0	5	0.350129	1	HYPOTHETICAL protein PGTG_14722 [PUCCINIA graminis f. sp. tritici CRL 75-36-700-3] >gi|309312165|gb|EFP88756.1| cytochrome c oxidase subunit VIIc [PUCCINIA graminis f. sp. tritici CRL 75-36-700-3]	XP_003333175	0.00560436
23242	0	4	0.430439	1	HYPOTHETICAL protein PGTG_14728 [PUCCINIA graminis f. sp. tritici CRL 75-36-700-3]	EFP88762	5.48425e-43
21045	0	7	0.232934	1	HYPOTHETICAL protein PGTG_14840 [PUCCINIA graminis f. sp. tritici CRL 75-36-700-3]	XP_003333054	6.45375e-17
22443	0	6	0.285179	1	HYPOTHETICAL protein PGTG_14943 [PUCCINIA graminis f. sp. tritici CRL 75-36-700-3] >gi|309312511|gb|EFP89102.1| HYPOTHETICAL protein PGTG_14943 [PUCCINIA graminis f. sp. tritici CRL 75-36-700-3]	XP_003333521	8.10851e-26
21299	0	10	0.126722	1	HYPOTHETICAL protein PGTG_14970 [PUCCINIA graminis f. sp. tritici CRL 75-36-700-3]	XP_003333548	4.50943e-70
24956	0	2	0.66493	1	HYPOTHETICAL protein PGTG_15007 [PUCCINIA graminis f. sp. tritici CRL 75-36-700-3]	EFP89166	3.33512e-38
23632	0	4	0.430439	1	HYPOTHETICAL protein PGTG_15147 [PUCCINIA graminis f. sp. tritici CRL 75-36-700-3]	EFP88944	5.01287e-30
23633	0	3	0.530267	1	HYPOTHETICAL protein PGTG_15147 [PUCCINIA graminis f. sp. tritici CRL 75-36-700-3]	EFP88944	6.06075e-16
26820	0	2	0.66493	1	HYPOTHETICAL protein PGTG_15147 [PUCCINIA graminis f. sp. tritici CRL 75-36-700-3]	EFP88944	1.39153e-44
22198	0	11	0.102862	1	HYPOTHETICAL protein PGTG_15192 [PUCCINIA graminis f. sp. tritici CRL 75-36-700-3]	EFP88989	0.000216976
24984	0	3	0.530267	1	HYPOTHETICAL protein PGTG_15358 [PUCCINIA graminis f. sp. tritici CRL 75-36-700-3]	EFP89702	1.7976e-17
22451	0	3	0.530267	1	HYPOTHETICAL protein PGTG_15447 [PUCCINIA graminis f. sp. tritici CRL 75-36-700-3]	EFP89791	1.30259e-06
25376	0	2	0.66493	1	HYPOTHETICAL protein PGTG_15479 [PUCCINIA graminis f. sp. tritici CRL 75-36-700-3] >gi|309312709|gb|EFP89300.1| HYPOTHETICAL protein PGTG_15479 [PUCCINIA graminis f. sp. tritici CRL 75-36-700-3]	XP_003333719	1.63477e-13
23942	0	7	0.232934	1	HYPOTHETICAL protein PGTG_15561 [PUCCINIA graminis f. sp. tritici CRL 75-36-700-3]	EFP89382	5.95038e-12
26471	0	2	0.66493	1	HYPOTHETICAL protein PGTG_15565 [PUCCINIA graminis f. sp. tritici CRL 75-36-700-3] >gi|309313011|gb|EFP89602.1| HYPOTHETICAL protein PGTG_15565 [PUCCINIA graminis f. sp. tritici CRL 75-36-700-3]	XP_003334021	1.11678e-05
25402	0	2	0.66493	1	HYPOTHETICAL protein PGTG_15595 [PUCCINIA graminis f. sp. tritici CRL 75-36-700-3]	EFP89632	9.40466e-28
25969	0	2	0.66493	1	HYPOTHETICAL protein PGTG_15615 [PUCCINIA graminis f. sp. tritici CRL 75-36-700-3]	EFP89652	98.8786
26182	0	3	0.530267	1	HYPOTHETICAL protein PGTG_15619 [PUCCINIA graminis f. sp. tritici CRL 75-36-700-3] >gi|309313065|gb|EFP89656.1| HYPOTHETICAL protein PGTG_15619 [PUCCINIA graminis f. sp. tritici CRL 75-36-700-3]	XP_003334075	1.04642e-07
24693	0	3	0.530267	1	HYPOTHETICAL protein PGTG_15681 [PUCCINIA graminis f. sp. tritici CRL 75-36-700-3]	EFP89532	5.27813e-28
24108	0	7	0.232934	1	HYPOTHETICAL protein PGTG_15729 [PUCCINIA graminis f. sp. tritici CRL 75-36-700-3] >gi|309312989|gb|EFP89580.1| HYPOTHETICAL protein PGTG_15729 [PUCCINIA graminis f. sp. tritici CRL 75-36-700-3]	XP_003333999	1.82172e-37
24060	0	4	0.430439	1	HYPOTHETICAL protein PGTG_15756 [PUCCINIA graminis f. sp. tritici CRL 75-36-700-3]	XP_003334219	0.00140999
20959	0	5	0.350129	1	HYPOTHETICAL protein PGTG_15898 [PUCCINIA graminis f. sp. tritici CRL 75-36-700-3] >gi|309313459|gb|EFP90050.1| HYPOTHETICAL protein PGTG_15898 [PUCCINIA graminis f. sp. tritici CRL 75-36-700-3]	XP_003334469	1.82637e-22
25539	0	3	0.530267	1	HYPOTHETICAL protein PGTG_15910 [PUCCINIA graminis f. sp. tritici CRL 75-36-700-3] >gi|375171723|gb|EHS64453.1| HYPOTHETICAL protein PGTG_22267 [PUCCINIA graminis f. sp. tritici CRL 75-36-700-3]	XP_003334481	2.80603e-07
26616	0	3	0.530267	1	HYPOTHETICAL protein PGTG_16050 [PUCCINIA graminis f. sp. tritici CRL 75-36-700-3]	EFP90463	3.55035e-36
22680	0	2	0.66493	1	HYPOTHETICAL protein PGTG_16097 [PUCCINIA graminis f. sp. tritici CRL 75-36-700-3]	EFP90510	2.41646e-06
20643	0	9	0.15612	1	HYPOTHETICAL protein PGTG_16105 [PUCCINIA graminis f. sp. tritici CRL 75-36-700-3]	EFP90345	0.0703321
23536	0	2	0.66493	1	HYPOTHETICAL protein PGTG_16228 [PUCCINIA graminis f. sp. tritici CRL 75-36-700-3] >gi|309313349|gb|EFP89940.1| HYPOTHETICAL protein PGTG_16228 [PUCCINIA graminis f. sp. tritici CRL 75-36-700-3]	XP_003334359	6.01601e-24
21044	0	10	0.126722	1	HYPOTHETICAL protein PGTG_16232 [PUCCINIA graminis f. sp. tritici CRL 75-36-700-3]	EFP89944	3.55386e-12
26365	0	2	0.66493	1	HYPOTHETICAL protein PGTG_16260 [PUCCINIA graminis f. sp. tritici CRL 75-36-700-3]	EFP89972	2.00814e-13
24712	0	5	0.350129	1	HYPOTHETICAL protein PGTG_16375 [PUCCINIA graminis f. sp. tritici CRL 75-36-700-3] >gi|309314593|gb|EFP91184.1| HYPOTHETICAL protein PGTG_16375 [PUCCINIA graminis f. sp. tritici CRL 75-36-700-3]	XP_003335603	0.00771824
24662	0	2	0.66493	1	HYPOTHETICAL protein PGTG_16390 [PUCCINIA graminis f. sp. tritici CRL 75-36-700-3]	EFP91199	2.62268e-16
24438	0	3	0.530267	1	HYPOTHETICAL protein PGTG_16456 [PUCCINIA graminis f. sp. tritici CRL 75-36-700-3]	EFP90178	3.54565e-21
24171	0	4	0.430439	1	HYPOTHETICAL protein PGTG_16474 [PUCCINIA graminis f. sp. tritici CRL 75-36-700-3] >gi|309313605|gb|EFP90196.1| HYPOTHETICAL protein PGTG_16474 [PUCCINIA graminis f. sp. tritici CRL 75-36-700-3]	XP_003334615	1.59113e-55
21419	0	12	0.0835669	1	HYPOTHETICAL protein PGTG_16484 [PUCCINIA graminis f. sp. tritici CRL 75-36-700-3]	EFP90206	6.05287e-08
22308	0	4	0.430439	1	HYPOTHETICAL protein PGTG_16571 [PUCCINIA graminis f. sp. tritici CRL 75-36-700-3] >gi|375172174|gb|EHS64570.1| MC family mitochondrial carrier protein [PUCCINIA graminis f. sp. tritici CRL 75-36-700-3]	XP_003334964	4.17277e-17
23190	0	7	0.232934	1	HYPOTHETICAL protein PGTG_16571 [PUCCINIA graminis f. sp. tritici CRL 75-36-700-3] >gi|375172174|gb|EHS64570.1| MC family mitochondrial carrier protein [PUCCINIA graminis f. sp. tritici CRL 75-36-700-3]	XP_003334964	1.16531e-67
23968	0	2	0.66493	1	HYPOTHETICAL protein PGTG_16659 [PUCCINIA graminis f. sp. tritici CRL 75-36-700-3] >gi|309314042|gb|EFP90633.1| HYPOTHETICAL protein PGTG_16659 [PUCCINIA graminis f. sp. tritici CRL 75-36-700-3]	XP_003335052	1.95022e-16
24845	0	4	0.430439	1	HYPOTHETICAL protein PGTG_16671 [PUCCINIA graminis f. sp. tritici CRL 75-36-700-3]	EFP90645	5.77814e-32
22212	0	2	0.66493	1	HYPOTHETICAL protein PGTG_16737 [PUCCINIA graminis f. sp. tritici CRL 75-36-700-3]	XP_003335130	9.15835e-16
26123	0	3	0.530267	1	HYPOTHETICAL protein PGTG_16888 [PUCCINIA graminis f. sp. tritici CRL 75-36-700-3]	EFP91143	2.03455e-41
24370	0	4	0.430439	1	HYPOTHETICAL protein PGTG_16931 [PUCCINIA graminis f. sp. tritici CRL 75-36-700-3]	EFP91069	2.42863e-18
22413	0	5	0.350129	1	HYPOTHETICAL protein PGTG_16940 [PUCCINIA graminis f. sp. tritici CRL 75-36-700-3]	EFP91078	7.63298e-22
22588	0	2	0.66493	1	HYPOTHETICAL protein PGTG_16990 [PUCCINIA graminis f. sp. tritici CRL 75-36-700-3]	XP_003335755	3.25144e-09
24736	0	2	0.66493	1	HYPOTHETICAL protein PGTG_17006 [PUCCINIA graminis f. sp. tritici CRL 75-36-700-3] >gi|309314761|gb|EFP91352.1| HYPOTHETICAL protein PGTG_17006 [PUCCINIA graminis f. sp. tritici CRL 75-36-700-3]	XP_003335771	22.8596
24803	0	3	0.530267	1	HYPOTHETICAL protein PGTG_17019 [PUCCINIA graminis f. sp. tritici CRL 75-36-700-3]	EFP91365	2.86501e-15
21755	0	7	0.232934	1	HYPOTHETICAL protein PGTG_17021 [PUCCINIA graminis f. sp. tritici CRL 75-36-700-3]	EFP91367	1.66348e-14
20925	0	8	0.191526	1	HYPOTHETICAL protein PGTG_17056 [PUCCINIA graminis f. sp. tritici CRL 75-36-700-3]	EFP90857	7.44227e-45
26856	0	3	0.530267	1	HYPOTHETICAL protein PGTG_17149 [PUCCINIA graminis f. sp. tritici CRL 75-36-700-3] >gi|309314701|gb|EFP91292.1| HYPOTHETICAL protein PGTG_17149 [PUCCINIA graminis f. sp. tritici CRL 75-36-700-3]	XP_003335711	0.64469
21780	0	11	0.102862	1	HYPOTHETICAL protein PGTG_17172 [PUCCINIA graminis f. sp. tritici CRL 75-36-700-3] >gi|309314724|gb|EFP91315.1| HYPOTHETICAL protein PGTG_17172 [PUCCINIA graminis f. sp. tritici CRL 75-36-700-3]	XP_003335734	3.73492e-17
21370	0	12	0.0835669	1	HYPOTHETICAL protein PGTG_17246 [PUCCINIA graminis f. sp. tritici CRL 75-36-700-3] >gi|309314383|gb|EFP90974.1| HYPOTHETICAL protein PGTG_17246 [PUCCINIA graminis f. sp. tritici CRL 75-36-700-3]	XP_003335393	3.36548e-26
25177	0	8	0.191526	1	HYPOTHETICAL protein PGTG_17332, partial [PUCCINIA graminis f. sp. tritici CRL 75-36-700-3]	EFP91376	2.20707e-18
25951	0	4	0.430439	1	HYPOTHETICAL protein PGTG_17378 [PUCCINIA graminis f. sp. tritici CRL 75-36-700-3] >gi|309314831|gb|EFP91422.1| HYPOTHETICAL protein PGTG_17378 [PUCCINIA graminis f. sp. tritici CRL 75-36-700-3]	XP_003335841	7.39111e-29
21972	0	1	1	1	HYPOTHETICAL protein PGTG_17391 [PUCCINIA graminis f. sp. tritici CRL 75-36-700-3] >gi|309314844|gb|EFP91435.1| HYPOTHETICAL protein PGTG_17391 [PUCCINIA graminis f. sp. tritici CRL 75-36-700-3]	XP_003335854	3.7693e-19
21973	0	1	1	1	HYPOTHETICAL protein PGTG_17391 [PUCCINIA graminis f. sp. tritici CRL 75-36-700-3] >gi|309314844|gb|EFP91435.1| HYPOTHETICAL protein PGTG_17391 [PUCCINIA graminis f. sp. tritici CRL 75-36-700-3]	XP_003335854	3.64423e-18
22633	0	9	0.15612	1	HYPOTHETICAL protein PGTG_17500 [PUCCINIA graminis f. sp. tritici CRL 75-36-700-3]	XP_003336063	3.22964e-32
25033	0	4	0.430439	1	HYPOTHETICAL protein PGTG_17501 [PUCCINIA graminis f. sp. tritici CRL 75-36-700-3] >gi|309315054|gb|EFP91645.1| HYPOTHETICAL protein PGTG_17501 [PUCCINIA graminis f. sp. tritici CRL 75-36-700-3]	XP_003336064	0.600599
21116	0	2	0.66493	1	HYPOTHETICAL protein PGTG_17507 [PUCCINIA graminis f. sp. tritici CRL 75-36-700-3]	XP_003336070	0.000115019
26097	0	3	0.530267	1	HYPOTHETICAL protein PGTG_17515 [PUCCINIA graminis f. sp. tritici CRL 75-36-700-3]	XP_003336078	4.37543e-06
25491	0	10	0.126722	1	HYPOTHETICAL protein PGTG_17519 [PUCCINIA graminis f. sp. tritici CRL 75-36-700-3] >gi|309315072|gb|EFP91663.1| HYPOTHETICAL protein PGTG_17519 [PUCCINIA graminis f. sp. tritici CRL 75-36-700-3]	XP_003336082	2.89636e-17
19091	0	7	0.232934	1	HYPOTHETICAL protein PGTG_17658 [PUCCINIA graminis f. sp. tritici CRL 75-36-700-3]	XP_003336023	2.95976e-09
24557	0	5	0.350129	1	HYPOTHETICAL protein PGTG_17672 [PUCCINIA graminis f. sp. tritici CRL 75-36-700-3] >gi|309315027|gb|EFP91618.1| HYPOTHETICAL protein PGTG_17672 [PUCCINIA graminis f. sp. tritici CRL 75-36-700-3]	XP_003336037	8.73327e-28
25789	0	3	0.530267	1	HYPOTHETICAL protein PGTG_17677 [PUCCINIA graminis f. sp. tritici CRL 75-36-700-3]	XP_003336042	2.78972e-24
23481	0	3	0.530267	1	HYPOTHETICAL protein PGTG_17889 [PUCCINIA graminis f. sp. tritici CRL 75-36-700-3]	XP_003336578	3.80623
23580	0	2	0.66493	1	HYPOTHETICAL protein PGTG_17942 [PUCCINIA graminis f. sp. tritici CRL 75-36-700-3] >gi|309315324|gb|EFP91915.1| peroxiredoxin (alkyl hydroperoxide reductase subunit C) [PUCCINIA graminis f. sp. tritici CRL 75-36-700-3]	XP_003336334	1.90702e-14
24799	0	3	0.530267	1	HYPOTHETICAL protein PGTG_18022 [PUCCINIA graminis f. sp. tritici CRL 75-36-700-3] >gi|309315237|gb|EFP91828.1| HYPOTHETICAL protein PGTG_18022 [PUCCINIA graminis f. sp. tritici CRL 75-36-700-3]	XP_003336247	1.68082e-05
24283	0	3	0.530267	1	HYPOTHETICAL protein PGTG_18024 [PUCCINIA graminis f. sp. tritici CRL 75-36-700-3] >gi|309315239|gb|EFP91830.1| HYPOTHETICAL protein PGTG_18024 [PUCCINIA graminis f. sp. tritici CRL 75-36-700-3]	XP_003336249	0.000117241
25134	0	2	0.66493	1	HYPOTHETICAL protein PGTG_18028 [PUCCINIA graminis f. sp. tritici CRL 75-36-700-3]	EFP91834	4.41313e-09
25421	0	4	0.430439	1	HYPOTHETICAL protein PGTG_18337 [PUCCINIA graminis f. sp. tritici CRL 75-36-700-3] >gi|309315759|gb|EFP92350.1| HYPOTHETICAL protein PGTG_18337 [PUCCINIA graminis f. sp. tritici CRL 75-36-700-3]	XP_003336769	0.101453
25920	0	3	0.530267	1	HYPOTHETICAL protein PGTG_18355 [PUCCINIA graminis f. sp. tritici CRL 75-36-700-3] >gi|309315777|gb|EFP92368.1| HYPOTHETICAL protein PGTG_18355 [PUCCINIA graminis f. sp. tritici CRL 75-36-700-3]	XP_003336787	2.58888e-10
22764	0	2	0.66493	1	HYPOTHETICAL protein PGTG_18396 [PUCCINIA graminis f. sp. tritici CRL 75-36-700-3]	XP_003336364	8.15841e-53
22375	0	10	0.126722	1	HYPOTHETICAL protein PGTG_18571 [PUCCINIA graminis f. sp. tritici CRL 75-36-700-3] >gi|309316201|gb|EFP92792.1| HYPOTHETICAL protein PGTG_18571 [PUCCINIA graminis f. sp. tritici CRL 75-36-700-3]	XP_003337211	7.88606e-22
26541	0	3	0.530267	1	HYPOTHETICAL protein PGTG_18715 [PUCCINIA graminis f. sp. tritici CRL 75-36-700-3]	EFP92583	8.72957e-14
20726	0	11	0.102862	1	HYPOTHETICAL protein PGTG_18871 [PUCCINIA graminis f. sp. tritici CRL 75-36-700-3] >gi|309316439|gb|EFP93030.1| HYPOTHETICAL protein PGTG_18871 [PUCCINIA graminis f. sp. tritici CRL 75-36-700-3]	XP_003337449	3.45519e-05
23956	0	4	0.430439	1	HYPOTHETICAL protein PGTG_19036 [PUCCINIA graminis f. sp. tritici CRL 75-36-700-3] >gi|309316327|gb|EFP92918.1| cytochrome c oxidase subunit Va [PUCCINIA graminis f. sp. tritici CRL 75-36-700-3]	XP_003337337	3.27229e-57
22821	0	7	0.232934	1	HYPOTHETICAL protein PGTG_19278 [PUCCINIA graminis f. sp. tritici CRL 75-36-700-3] >gi|309316732|gb|EFP93323.1| HYPOTHETICAL protein PGTG_19278 [PUCCINIA graminis f. sp. tritici CRL 75-36-700-3]	XP_003337742	5.38845e-07
26264	0	3	0.530267	1	HYPOTHETICAL protein PGTG_19495 [PUCCINIA graminis f. sp. tritici CRL 75-36-700-3] >gi|309316827|gb|EFP93418.1| HYPOTHETICAL protein PGTG_19495 [PUCCINIA graminis f. sp. tritici CRL 75-36-700-3]	XP_003337837	2.00568e-24
24433	0	2	0.66493	1	HYPOTHETICAL protein PGTG_19762 [PUCCINIA graminis f. sp. tritici CRL 75-36-700-3]	XP_003338284	7.00139e-20
25806	0	3	0.530267	1	HYPOTHETICAL protein PGTG_19915 [PUCCINIA graminis f. sp. tritici CRL 75-36-700-3] >gi|309317285|gb|EFP93876.1| HYPOTHETICAL protein PGTG_19915 [PUCCINIA graminis f. sp. tritici CRL 75-36-700-3]	XP_003338295	2.13648e-33
22235	0	5	0.350129	1	HYPOTHETICAL protein PGTG_20008 [PUCCINIA graminis f. sp. tritici CRL 75-36-700-3]	EFP93992	6.27321e-10
25266	0	6	0.285179	1	HYPOTHETICAL protein PGTG_20940 [PUCCINIA graminis f. sp. tritici CRL 75-36-700-3]	EHS64330	5.39019e-19
21223	0	5	0.350129	1	HYPOTHETICAL protein PGTG_21123 [PUCCINIA graminis f. sp. tritici CRL 75-36-700-3]	EHS62577	2.46164e-39
24327	0	4	0.430439	1	HYPOTHETICAL protein PGTG_21537 [PUCCINIA graminis f. sp. tritici CRL 75-36-700-3]	EHS63361	63.9977
26412	0	2	0.66493	1	HYPOTHETICAL protein PGTG_21567 [PUCCINIA graminis f. sp. tritici CRL 75-36-700-3]	EHS63434	1.42764e-15
22845	0	8	0.191526	1	HYPOTHETICAL protein PGTG_21606 [PUCCINIA graminis f. sp. tritici CRL 75-36-700-3]	EHS63476	9.81025e-16
22517	0	3	0.530267	1	HYPOTHETICAL protein PGTG_21607 [PUCCINIA graminis f. sp. tritici CRL 75-36-700-3]	EHS63478	2.71513e-07
24381	0	3	0.530267	1	HYPOTHETICAL protein PGTG_21647 [PUCCINIA graminis f. sp. tritici CRL 75-36-700-3]	EHS63541	0.0228366
22077	0	5	0.350129	1	HYPOTHETICAL protein PGTG_21749 [PUCCINIA graminis f. sp. tritici CRL 75-36-700-3]	EHS63785	0.000470663
21790	0	10	0.126722	1	HYPOTHETICAL protein PGTG_21817 [PUCCINIA graminis f. sp. tritici CRL 75-36-700-3]	EHS63800	0.000624678
25921	0	2	0.66493	1	HYPOTHETICAL protein PGTG_21821 [PUCCINIA graminis f. sp. tritici CRL 75-36-700-3]	EHS63805	3.24647e-21
22694	0	5	0.350129	1	HYPOTHETICAL protein PGTG_21990 [PUCCINIA graminis f. sp. tritici CRL 75-36-700-3]	EHS63987	2.59296e-36
24151	0	8	0.191526	1	HYPOTHETICAL protein PGTG_22071 [PUCCINIA graminis f. sp. tritici CRL 75-36-700-3]	EHS64161	1.31852e-13
23389	0	6	0.285179	1	HYPOTHETICAL protein PGTG_22592 [PUCCINIA graminis f. sp. tritici CRL 75-36-700-3]	EHS62617	9.58129e-11
21853	0	8	0.191526	1	HYPOTHETICAL protein PGTG_22737 [PUCCINIA graminis f. sp. tritici CRL 75-36-700-3]	EHS62911	1.36057e-08
26333	0	3	0.530267	1	HYPOTHETICAL protein PGTG_22788 [PUCCINIA graminis f. sp. tritici CRL 75-36-700-3]	EHS63310	2.50374e-20
21684	0	8	0.191526	1	HYPOTHETICAL protein PHYSODRAFT_499752 [Phytophthora sojae]	EGZ17537	1.83538e-06
23862	0	13	0.0683089	1	HYPOTHETICAL protein SCHCODRAFT_68736 [Schizophyllum commune H4-8] >gi|300104836|gb|EFI96241.1| HYPOTHETICAL protein SCHCODRAFT_68736 [Schizophyllum commune H4-8]	XP_003031144	3.32986e-23
22956	0	4	0.430439	1	HYPOTHETICAL protein SCHCODRAFT_71592 [Schizophyllum commune H4-8] >gi|300110118|gb|EFJ01519.1| HYPOTHETICAL protein SCHCODRAFT_71592 [Schizophyllum commune H4-8]	XP_003036421	2.26714e-19
24610	0	2	0.66493	1	HYPOTHETICAL protein SCHCODRAFT_9862 [Schizophyllum commune H4-8] >gi|300111859|gb|EFJ03260.1| HYPOTHETICAL protein SCHCODRAFT_9862 [Schizophyllum commune H4-8]	XP_003038162	0.751378
21645	0	3	0.530267	1	HYPOTHETICAL protein SERLA73DRAFT_147484 [Serpula lacrymans var. lacrymans S7.3]	EGN92267	0.0170246
23693	0	2	0.66493	1	HYPOTHETICAL protein SERLA73DRAFT_173933 [Serpula lacrymans var. lacrymans S7.3] >gi|336389444|gb|EGO30587.1| HYPOTHETICAL protein SERLADRAFT_454887 [Serpula lacrymans var. lacrymans S7.9]	EGO04739	1.03714e-19
24264	0	4	0.430439	1	HYPOTHETICAL protein SERLA73DRAFT_47337 [Serpula lacrymans var. lacrymans S7.3] >gi|336387643|gb|EGO28788.1| HYPOTHETICAL protein SERLADRAFT_366486 [Serpula lacrymans var. lacrymans S7.9]	EGO03046	0.12039
25927	0	2	0.66493	1	HYPOTHETICAL protein SERLA73DRAFT_67808 [Serpula lacrymans var. lacrymans S7.3] >gi|336377542|gb|EGO18704.1| HYPOTHETICAL protein SERLADRAFT_353223 [Serpula lacrymans var. lacrymans S7.9] >gi|336377549|gb|EGO18711.1| HYPOTHETICAL protein SERLADRAFT_353196 [Serpula lacrymans var. lacrymans S7.9] >gi|336377555|gb|EGO18717.1| HYPOTHETICAL protein SERLADRAFT_353213 [Serpula lacrymans var. lacrymans S…	EGN91020	2.82019e-08
21462	0	9	0.15612	1	HYPOTHETICAL protein SERLA73DRAFT_76485 [Serpula lacrymans var. lacrymans S7.3] >gi|336379750|gb|EGO20904.1| HYPOTHETICAL protein SERLADRAFT_441298 [Serpula lacrymans var. lacrymans S7.9]	EGN95370	0.0768663
24452	0	2	0.66493	1	HYPOTHETICAL protein THITE_2113061 [Thielavia terrestris NRRL 8126] >gi|346999333|gb|AEO65735.1| HYPOTHETICAL protein THITE_2113061 [Thielavia terrestris NRRL 8126]	XP_003652071	2.73887e-12
23888	0	2	0.66493	1	HYPOTHETICAL protein, variant [PUCCINIA graminis f. sp. tritici CRL 75-36-700-3]	EHS62932	1.62616e-06
23102	0	2	0.66493	1	HYPOTHETICAL protein, variant [PUCCINIA graminis f. sp. tritici CRL 75-36-700-3]	EHS63330	2.31351e-24
25394	0	2	0.66493	1	HYPOTHETICAL protein, variant [PUCCINIA graminis f. sp. tritici CRL 75-36-700-3]	EHS63758	5.0162e-06
26781	0	3	0.530267	1	HYPOTHETICAL protein, variant [PUCCINIA graminis f. sp. tritici CRL 75-36-700-3]	EHS63941	9.86088e-19
25667	0	2	0.66493	1	HYPOTHETICAL protein, variant [PUCCINIA graminis f. sp. tritici CRL 75-36-700-3]	EHS64032	2.88043e-24
26717	0	2	0.66493	1	HYPOTHETICAL protein, variant [PUCCINIA graminis f. sp. tritici CRL 75-36-700-3]	EHS64111	2.08651e-13
22343	0	6	0.285179	1	HYPOTHETICAL protein, variant [PUCCINIA graminis f. sp. tritici CRL 75-36-700-3] >gi|375170855|gb|EFP88740.2| HYPOTHETICAL protein PGTG_14706 [PUCCINIA graminis f. sp. tritici CRL 75-36-700-3]	EHS64224	4.01258e-27
26129	0	2	0.66493	1	imidazole glycerol phosphate synthase hisHF [PUCCINIA graminis f. sp. tritici CRL 75-36-700-3] >gi|309309987|gb|EFP86578.1| glutamine amidotransferase [PUCCINIA graminis f. sp. tritici CRL 75-36-700-3]	XP_003330997	2.6139e-46
22602	0	4	0.430439	1	Indigoidine synthase A-like protein [Rhodotorula glutinis ATCC 204091]	EGU13241	6.40124
24720	0	10	0.126722	1	initiation-specific alpha-1,6-mannosyltransferase [Verticillium albo-atrum VaMs.102] >gi|261353812|gb|EEY16240.1| initiation-specific alpha-1,6-mannosyltransferase [Verticillium albo-atrum VaMs.102]	XP_003008161	1.38277e-06
26854	0	2	0.66493	1	inorganic phosphate transporter [PUCCINIA graminis f. sp. tritici CRL 75-36-700-3] >gi|309314318|gb|EFP90909.1| HYPOTHETICAL protein PGTG_17181 [PUCCINIA graminis f. sp. tritici CRL 75-36-700-3]	XP_003335328	1.34483e-23
26591	0	2	0.66493	1	integral membrane protein [Melam larici-populina 98AG31]	EGG05235	1.16138e-14
26811	0	2	0.66493	1	isoleucyl-tRNA synthetase [PUCCINIA graminis f. sp. tritici CRL 75-36-700-3]	EFP84561	5.09469e-12
15177	0	3	0.530267	1	isopentenyl-diphosphate Delta-isomerase 1 [PUCCINIA graminis f. sp. tritici CRL 75-36-700-3] >gi|309313601|gb|EFP90192.1| isopentenyl-diphosphate Delta-isomerase [PUCCINIA graminis f. sp. tritici CRL 75-36-700-3]	XP_003334611	6.89175e-10
24194	0	2	0.66493	1	karyopherin Kap109 [PUCCINIA graminis f. sp. tritici CRL 75-36-700-3]	XP_003320509	6.89506e-32
26645	0	3	0.530267	1	lamin-B receptor [PUCCINIA graminis f. sp. tritici CRL 75-36-700-3] >gi|309311044|gb|EFP87635.1| delta14-sterol reductase [PUCCINIA graminis f. sp. tritici CRL 75-36-700-3]	XP_003332054	9.06721e-48
22406	0	9	0.15612	1	large subunit RIBOSOMAL protein L27e [PUCCINIA graminis f. sp. tritici CRL 75-36-700-3]	EFP91882	1.28001e-68
21195	0	10	0.126722	1	large subunit RIBOSOMAL protein L5e [PUCCINIA graminis f. sp. tritici CRL 75-36-700-3]	EFP91212	3.62736e-45
23563	0	10	0.126722	1	large subunit RIBOSOMAL protein LP0 [PUCCINIA graminis f. sp. tritici CRL 75-36-700-3]	EFP80232	1.97651e-59
23195	0	4	0.430439	1	major alcohol dehydrogenase [PUCCINIA graminis f. sp. tritici CRL 75-36-700-3] >gi|309317631|gb|EFP94222.1| HYPOTHETICAL protein PGTG_20122 [PUCCINIA graminis f. sp. tritici CRL 75-36-700-3] >gi|375164119|gb|EHS62598.1| HYPOTHETICAL protein PGTG_22572 [PUCCINIA graminis f. sp. tritici CRL 75-36-700-3]	XP_003338641	1.18649e-51
23809	0	10	0.126722	1	malate dehydrogenase [PUCCINIA graminis f. sp. tritici CRL 75-36-700-3] >gi|309302318|gb|EFP78909.1| malate dehydrogenase, NAD-dependent [PUCCINIA graminis f. sp. tritici CRL 75-36-700-3]	XP_003323328	9.85918e-23
22834	0	2	0.66493	1	malate synthase [PUCCINIA graminis f. sp. tritici CRL 75-36-700-3]	XP_003327659	2.28405e-29
26211	0	3	0.530267	1	mannose-6-phosphate isomerase [PUCCINIA graminis f. sp. tritici CRL 75-36-700-3]	XP_003325883	6.47997e-35
22771	0	4	0.430439	1	medium-chain specific acyl-CoA dehydrogenase [PUCCINIA graminis f. sp. tritici CRL 75-36-700-3]	XP_003320248	5.26219e-27
21576	0	2	0.66493	1	medium-chain specific acyl-CoA dehydrogenase [Verticillium dahliae VdLs.17]	EGY13518	0.0815595
22995	0	3	0.530267	1	membrane transporter [PUCCINIA graminis f. sp. tritici CRL 75-36-700-3]	XP_003325372	3.36115e-08
22487	0	3	0.530267	1	methoxy mycolic acid synthase 1 [PUCCINIA graminis f. sp. tritici CRL 75-36-700-3] >gi|309310585|gb|EFP87176.1| cyclopropane-fatty-acyl-phospholipid synthase [PUCCINIA graminis f. sp. tritici CRL 75-36-700-3]	XP_003331595	2.91902e-51
22871	0	3	0.530267	1	mitochondrial coenzyme A transporter [PUCCINIA graminis f. sp. tritici CRL 75-36-700-3] >gi|309310295|gb|EFP86886.1| HYPOTHETICAL protein PGTG_12627 [PUCCINIA graminis f. sp. tritici CRL 75-36-700-3]	XP_003331305	3.32181e-09
26164	0	2	0.66493	1	mitochondrial import inner membrane translocase subunit tim23 [PUCCINIA graminis f. sp. tritici CRL 75-36-700-3] >gi|309305767|gb|EFP82358.1| HYPOTHETICAL protein PGTG_08314 [PUCCINIA graminis f. sp. tritici CRL 75-36-700-3]	XP_003326777	9.7382e-18
24183	0	4	0.430439	1	mitochondrial solute transporter [PUCCINIA graminis f. sp. tritici CRL 75-36-700-3] >gi|309309106|gb|EFP85697.1| MC family mitochondrial carrier protein [PUCCINIA graminis f. sp. tritici CRL 75-36-700-3]	XP_003330116	4.98292e-35
24812	0	2	0.66493	1	mitochondrial-processing peptidase subunit beta [PUCCINIA graminis f. sp. tritici CRL 75-36-700-3] >gi|309297503|gb|EFP74094.1| mitochondrial-processing peptidase subunit beta [PUCCINIA graminis f. sp. tritici CRL 75-36-700-3]	XP_003307100	3.4503e-42
26407	0	2	0.66493	1	mitogen-activated protein kinase organizer 1 [PUCCINIA graminis f. sp. tritici CRL 75-36-700-3] >gi|309308589|gb|EFP85180.1| HYPOTHETICAL protein PGTG_11349 [PUCCINIA graminis f. sp. tritici CRL 75-36-700-3]	XP_003329599	6.90492e-22
21085	0	6	0.285179	1	monothiol glutaredoxin-4 [PUCCINIA graminis f. sp. tritici CRL 75-36-700-3] >gi|309301820|gb|EFP78411.1| HYPOTHETICAL protein PGTG_04367 [PUCCINIA graminis f. sp. tritici CRL 75-36-700-3]	XP_003322830	1.91553e-21
21235	0	8	0.191526	1	myo-inositol-1-phosphate synthase [PUCCINIA graminis f. sp. tritici CRL 75-36-700-3]	EFP83375	2.99108e-47
21669	0	8	0.191526	1	NAD binding dehydrogenase [PUCCINIA graminis f. sp. tritici CRL 75-36-700-3]	XP_003307668	3.62457e-12
24709	0	3	0.530267	1	NADH dehydrogenase (ubiquinone) 1 alpha subcomplex 8 [PUCCINIA graminis f. sp. tritici CRL 75-36-700-3]	EFP78635	1.04522e-52
21505	0	10	0.126722	1	NADH dehydrogenase flavoprotein 2 [PUCCINIA graminis f. sp. tritici CRL 75-36-700-3] >gi|309317161|gb|EFP93752.1| NADH dehydrogenase (ubiquinone) flavoprotein 2 [PUCCINIA graminis f. sp. tritici CRL 75-36-700-3]	XP_003338171	1.34409e-36
26767	0	2	0.66493	1	NADH dehydrogenase subunit 4 [Phakopsora meibomiae] >gi|253807594|gb|ACT36173.1| NADH dehydrogenase subunit 4 [Phakopsora meibomiae]	YP_003795691	1.67939e-11
23039	0	3	0.530267	1	NADH2 dehydrogenase subunit 40K [PUCCINIA graminis f. sp. tritici CRL 75-36-700-3] >gi|309310381|gb|EFP86972.1| NADH dehydrogenase (ubiquinone) 1 alpha subcomplex 9 [PUCCINIA graminis f. sp. tritici CRL 75-36-700-3]	XP_003331391	4.20919e-21
26694	0	3	0.530267	1	NADH-cytochrome b5 reductase [Phanerochaete chrysosporium]	AAX49402	2.94435e-19
21272	0	2	0.66493	1	NADH-ubiquinone oxidoreductase subunit [PUCCINIA graminis f. sp. tritici CRL 75-36-700-3] >gi|309304682|gb|EFP81273.1| NADH-ubiquinone oxidoreductase 78 kDa subunit, mitochondrial [PUCCINIA graminis f. sp. tritici CRL 75-36-700-3]	XP_003325692	5.14114e-10
24451	0	5	0.350129	1	NAD-specific glutamate dehydrogenase [PUCCINIA graminis f. sp. tritici CRL 75-36-700-3] >gi|309311710|gb|EFP88301.1| glutamate dehydrogenase [PUCCINIA graminis f. sp. tritici CRL 75-36-700-3]	XP_003332720	2.62295e-17
21429	0	9	0.15612	1	nascent polypeptide-associated complex subunit beta [PUCCINIA graminis f. sp. tritici CRL 75-36-700-3] >gi|309305718|gb|EFP82309.1| nascent polypeptide-associated complex subunit beta [PUCCINIA graminis f. sp. tritici CRL 75-36-700-3]	XP_003326728	0.17725
21017	0	10	0.126722	1	neutral alpha-glucosidase AB [PUCCINIA graminis f. sp. tritici CRL 75-36-700-3]	XP_003331536	8.30036e-06
12845	0	6	0.285179	1	neutral trehalase [PUCCINIA graminis f. sp. tritici CRL 75-36-700-3] >gi|309317292|gb|EFP93883.1| alpha,alpha-trehalase [PUCCINIA graminis f. sp. tritici CRL 75-36-700-3]	XP_003338302	1.82247e-14
22383	0	2	0.66493	1	nicotinate-nucleotide pyrophosphorylase [PUCCINIA graminis f. sp. tritici CRL 75-36-700-3] >gi|309315796|gb|EFP92387.1| nicotinate-nucleotide diphosphorylase (carboxylating) [PUCCINIA graminis f. sp. tritici CRL 75-36-700-3]	XP_003336806	1.00221e-17
21444	0	2	0.66493	1	nuclear matrix protein NMP200 [PUCCINIA graminis f. sp. tritici CRL 75-36-700-3] >gi|309301810|gb|EFP78401.1| HYPOTHETICAL protein PGTG_04357 [PUCCINIA graminis f. sp. tritici CRL 75-36-700-3]	XP_003322820	1.40188e-42
21920	0	2	0.66493	1	nucleolar complex protein 2 [PUCCINIA graminis f. sp. tritici CRL 75-36-700-3] >gi|331225683|ref|XP_003325512.1| nucleolar complex protein 2 [PUCCINIA graminis f. sp. tritici CRL 75-36-700-3] >gi|309304499|gb|EFP81090.1| HYPOTHETICAL protein PGTG_07342 [PUCCINIA graminis f. sp. tritici CRL 75-36-700-3] >gi|309304502|gb|EFP81093.1| HYPOTHETICAL protein PGTG_07345 [PUCCINIA graminis f. sp. tritici …	XP_003325509	3.08726e-11
23170	0	2	0.66493	1	nucleolar protein 5A [PUCCINIA graminis f. sp. tritici CRL 75-36-700-3]	XP_003333380	1.58675
26240	0	2	0.66493	1	nucleoporin [Melam larici-populina 98AG31]	EGG00956	2.93956e-06
22132	0	3	0.530267	1	O-sialoglycoprotein endopeptidase [PUCCINIA graminis f. sp. tritici CRL 75-36-700-3]	XP_003333108	1.15404e-10
24088	0	5	0.350129	1	osRAD23 [PUCCINIA graminis f. sp. tritici CRL 75-36-700-3] >gi|309306726|gb|EFP83317.1| UV excision repair protein Rad23 [PUCCINIA graminis f. sp. tritici CRL 75-36-700-3]	XP_003327736	9.55767e-23
21401	0	2	0.66493	1	oxidoreductase [PUCCINIA graminis f. sp. tritici CRL 75-36-700-3] >gi|309301540|gb|EFP78131.1| HYPOTHETICAL protein PGTG_04087 [PUCCINIA graminis f. sp. tritici CRL 75-36-700-3]	XP_003322550	2.08457e-26
24756	0	5	0.350129	1	pad-1 [PUCCINIA graminis f. sp. tritici CRL 75-36-700-3]	XP_003336468	1.38696e-74
21534	0	5	0.350129	1	pathogen-induced defense-responsive protein 8 [PUCCINIA graminis f. sp. tritici CRL 75-36-700-3] >gi|378524387|sp|E3JV98.1|THI4_PUCGT RecName: Full=Thiamine thiazole synthase; AltName: Full=Thiazole biosynthetic enzyme >gi|309299382|gb|EFP75973.1| thiazole biosynthetic enzyme, mitochondrial [PUCCINIA graminis f. sp. tritici CRL 75-36-700-3]	XP_003320392	2.4474e-09
25505	0	2	0.66493	1	Pc13g07290 [Penicillium chrysogenum Wisconsin 54-1255] >gi|211583780|emb|CAP91798.1| Pc13g07290 [Penicillium chrysogenum Wisconsin 54-1255]	XP_002559160	8.28365
25127	0	3	0.530267	1	pentafunctional AROM polypeptide [PUCCINIA graminis f. sp. tritici CRL 75-36-700-3]	XP_003331976	9.52901e-13
20606	0	8	0.191526	1	peripheral-type benzodiazepine receptor [PUCCINIA graminis f. sp. tritici CRL 75-36-700-3] >gi|309314613|gb|EFP91204.1| HYPOTHETICAL protein PGTG_16395 [PUCCINIA graminis f. sp. tritici CRL 75-36-700-3]	XP_003335623	4.96465e-22
26550	0	3	0.530267	1	phenylalanine ammonia-lyase [PUCCINIA graminis f. sp. tritici CRL 75-36-700-3] >gi|309309736|gb|EFP86327.1| phenylalanine ammonia-lyase [PUCCINIA graminis f. sp. tritici CRL 75-36-700-3]	XP_003330746	0.000574932
24737	0	6	0.285179	1	phosphate transporter [PUCCINIA graminis f. sp. tritici CRL 75-36-700-3] >gi|309298122|gb|EFP74713.1| HYPOTHETICAL protein PGTG_00669 [PUCCINIA graminis f. sp. tritici CRL 75-36-700-3]	XP_003307719	1.31192e-36
21421	0	9	0.15612	1	phosphatidylethanolamine N-methyltransferase [PUCCINIA graminis f. sp. tritici CRL 75-36-700-3] >gi|309304337|gb|EFP80928.1| methylene-fatty-acyl-phospholipid synthase [PUCCINIA graminis f. sp. tritici CRL 75-36-700-3]	XP_003325347	2.39777e-31
23221	0	3	0.530267	1	phosphatidylglycerol/phosphatidylinositol transfer protein [PUCCINIA graminis f. sp. tritici CRL 75-36-700-3] >gi|309304788|gb|EFP81379.1| HYPOTHETICAL protein PGTG_07000 [PUCCINIA graminis f. sp. tritici CRL 75-36-700-3]	XP_003325798	2.09902e-36
21906	0	4	0.430439	1	phosphatidylinositol 3-kinase vps34 [PUCCINIA graminis f. sp. tritici CRL 75-36-700-3]	XP_003335193	0.0401004
24563	0	2	0.66493	1	phospho-2-dehydro-3-deoxyheptonate aldolase [PUCCINIA graminis f. sp. tritici CRL 75-36-700-3] >gi|309312449|gb|EFP89040.1| 3-deoxy-7-phosphoheptulonate synthase [PUCCINIA graminis f. sp. tritici CRL 75-36-700-3]	XP_003333459	0.00882101
20904	0	11	0.102862	1	phosphoenolpyruvate carboxykinase [PUCCINIA graminis f. sp. tritici CRL 75-36-700-3] >gi|309316441|gb|EFP93032.1| phosphoenolpyruvate carboxykinase [ATP] [PUCCINIA graminis f. sp. tritici CRL 75-36-700-3]	XP_003337451	0.0127505
26413	0	4	0.430439	1	phosphoglucomutase [PUCCINIA graminis f. sp. tritici CRL 75-36-700-3] >gi|309303170|gb|EFP79761.1| phosphoglucomutase [PUCCINIA graminis f. sp. tritici CRL 75-36-700-3]	XP_003324180	4.85965e-15
23224	0	3	0.530267	1	phosphoric monoester hydrolase [PUCCINIA graminis f. sp. tritici CRL 75-36-700-3] >gi|309314320|gb|EFP90911.1| HYPOTHETICAL protein PGTG_17183 [PUCCINIA graminis f. sp. tritici CRL 75-36-700-3]	XP_003335330	5.86255e-25
24496	0	2	0.66493	1	plastin-3 [PUCCINIA graminis f. sp. tritici CRL 75-36-700-3] >gi|309301826|gb|EFP78417.1| fimbrin [PUCCINIA graminis f. sp. tritici CRL 75-36-700-3]	XP_003322836	2.858e-71
22177	0	4	0.430439	1	postmeiotic segregation increased 2 nirs [PUCCINIA graminis f. sp. tritici CRL 75-36-700-3]	XP_003320881	2.31051
23722	0	3	0.530267	1	predicted protein [Laccaria bicolor S238N-H82] >gi|164647210|gb|EDR11454.1| predicted protein [Laccaria bicolor S238N-H82]	XP_001877351	1.55068e-88
25232	0	4	0.430439	1	pre-mRNA splicing factor [Cryptococcus gattii WM276] >gi|317461363|gb|ADV23104.1| pre-mRNA splicing factor, putative [Cryptococcus gattii WM276]	XP_003194891	3.40805e-16
20690	0	2	0.66493	1	pre-mRNA-processing-splicing factor 8 [PUCCINIA graminis f. sp. tritici CRL 75-36-700-3]	EFP74706	3.10642e-24
26266	0	2	0.66493	1	prephenate dehydrogenase [PUCCINIA graminis f. sp. tritici CRL 75-36-700-3]	XP_003320920	6.67326e-11
11967	0	8	0.191526	1	profilin-2 [PUCCINIA graminis f. sp. tritici CRL 75-36-700-3] >gi|309309400|gb|EFP85991.1| HYPOTHETICAL protein PGTG_11747 [PUCCINIA graminis f. sp. tritici CRL 75-36-700-3]	XP_003330410	2.90907e-07
23280	0	2	0.66493	1	prohibitin-1 [PUCCINIA graminis f. sp. tritici CRL 75-36-700-3] >gi|309306792|gb|EFP83383.1| prohibitin-1 [PUCCINIA graminis f. sp. tritici CRL 75-36-700-3]	XP_003327802	1.0791e-41
25241	0	2	0.66493	1	proline iminopeptidase [PUCCINIA graminis f. sp. tritici CRL 75-36-700-3]	EFP87042	2.82264e-23
25700	0	7	0.232934	1	proteasome subunit alpha [PUCCINIA graminis f. sp. tritici CRL 75-36-700-3]	XP_003320696	7.92102e-109
24323	0	4	0.430439	1	proteasome subunit alpha type-1 [PUCCINIA graminis f. sp. tritici CRL 75-36-700-3]	XP_003336867	2.94307e-47
21691	0	5	0.350129	1	proteasome subunit alpha type-2 [PUCCINIA graminis f. sp. tritici CRL 75-36-700-3] >gi|309310453|gb|EFP87044.1| proteasome subunit alpha type-2 [PUCCINIA graminis f. sp. tritici CRL 75-36-700-3]	XP_003331463	2.08419e-25
24556	0	8	0.191526	1	proteasome subunit alpha type-5 [PUCCINIA graminis f. sp. tritici CRL 75-36-700-3] >gi|309310590|gb|EFP87181.1| proteasome subunit alpha type-5 [PUCCINIA graminis f. sp. tritici CRL 75-36-700-3]	XP_003331600	8.78122e-52
25310	0	9	0.15612	1	proteasome subunit alpha type-7 [PUCCINIA graminis f. sp. tritici CRL 75-36-700-3] >gi|309308153|gb|EFP84744.1| 20S proteasome subunit alpha 4 [PUCCINIA graminis f. sp. tritici CRL 75-36-700-3]	XP_003329163	5.11047e-27
23197	0	1	1	1	protein disulfide isomerase [PUCCINIA graminis f. sp. tritici CRL 75-36-700-3] >gi|309301512|gb|EFP78103.1| HYPOTHETICAL protein PGTG_04059 [PUCCINIA graminis f. sp. tritici CRL 75-36-700-3]	XP_003322522	8.36326e-19
23199	0	1	1	1	protein disulfide isomerase [PUCCINIA graminis f. sp. tritici CRL 75-36-700-3] >gi|309301512|gb|EFP78103.1| HYPOTHETICAL protein PGTG_04059 [PUCCINIA graminis f. sp. tritici CRL 75-36-700-3]	XP_003322522	0.00200065
24203	0	4	0.430439	1	protein KES1 [PUCCINIA graminis f. sp. tritici CRL 75-36-700-3] >gi|309317730|gb|EFP94321.1| HYPOTHETICAL protein PGTG_20275 [PUCCINIA graminis f. sp. tritici CRL 75-36-700-3]	XP_003338740	2.08431e-11
25430	0	4	0.430439	1	protein phosphatase 2C [PUCCINIA graminis f. sp. tritici CRL 75-36-700-3] >gi|309304868|gb|EFP81459.1| HYPOTHETICAL protein PGTG_07080 [PUCCINIA graminis f. sp. tritici CRL 75-36-700-3]	XP_003325878	3.82497e-06
22535	0	9	0.15612	1	protein transport protein SEC61 subunit alpha [PUCCINIA graminis f. sp. tritici CRL 75-36-700-3]	XP_003327604	9.05606e-22
20715	0	2	0.66493	1	protein transporter SEC23 [PUCCINIA graminis f. sp. tritici CRL 75-36-700-3]	EFP76689	1.95629e-10
23584	0	3	0.530267	1	protein urg3 [PUCCINIA graminis f. sp. tritici CRL 75-36-700-3] >gi|309301944|gb|EFP78535.1| HYPOTHETICAL protein PGTG_04491 [PUCCINIA graminis f. sp. tritici CRL 75-36-700-3]	XP_003322954	2.9263e-08
25823	0	4	0.430439	1	protein VNG2075C [PUCCINIA graminis f. sp. tritici CRL 75-36-700-3]	XP_003320626	2.6737e-50
21334	0	1	1	1	protein YIP4 [PUCCINIA graminis f. sp. tritici CRL 75-36-700-3] >gi|309309137|gb|EFP85728.1| HYPOTHETICAL protein PGTG_11057 [PUCCINIA graminis f. sp. tritici CRL 75-36-700-3]	XP_003330147	1.70693e-18
21335	0	3	0.530267	1	protein YIP4 [PUCCINIA graminis f. sp. tritici CRL 75-36-700-3] >gi|309309137|gb|EFP85728.1| HYPOTHETICAL protein PGTG_11057 [PUCCINIA graminis f. sp. tritici CRL 75-36-700-3]	XP_003330147	1.96938e-38
22796	0	2	0.66493	1	protein YIP4 [PUCCINIA graminis f. sp. tritici CRL 75-36-700-3] >gi|309309137|gb|EFP85728.1| HYPOTHETICAL protein PGTG_11057 [PUCCINIA graminis f. sp. tritici CRL 75-36-700-3]	XP_003330147	5.2244e-32
20467	0	1	1	1	protein YOP1 [PUCCINIA graminis f. sp. tritici CRL 75-36-700-3] >gi|309310159|gb|EFP86750.1| HYPOTHETICAL protein PGTG_13132 [PUCCINIA graminis f. sp. tritici CRL 75-36-700-3]	XP_003331169	4.18511e-35
25226	0	2	0.66493	1	protoporphyrin IX magnesium chelatase [Pteris vittata]	ADI88502	2.51953
26732	0	3	0.530267	1	putative oligopeptide transporter [Melam larici-populina 98AG31]	EGG05733	0.00254041
25323	0	2	0.66493	1	putative oligopeptide transporter [Melam larici-populina 98AG31]	EGG07378	2.37909e-09
24537	0	8	0.191526	1	putative palmitoyl-protein thioesterase precursor [Melam larici-populina 98AG31]	EGG10454	0.0185074
25543	0	1	1	1	putative thaumatin-like protein [Flammulina velutipes]	ADX07312	5.02423
23895	0	2	0.66493	1	PX domain-containing protein [PUCCINIA graminis f. sp. tritici CRL 75-36-700-3] >gi|309298768|gb|EFP75359.1| HYPOTHETICAL protein PGTG_01952 [PUCCINIA graminis f. sp. tritici CRL 75-36-700-3]	XP_003319778	27.8994
27038	0	7	0.232934	1	pyruvate carboxylase [PUCCINIA graminis f. sp. tritici CRL 75-36-700-3] >gi|309311083|gb|EFP87674.1| pyruvate carboxylase [PUCCINIA graminis f. sp. tritici CRL 75-36-700-3]	XP_003332093	1.34677e-06
22401	0	6	0.285179	1	pyruvate kinase [PUCCINIA graminis f. sp. tritici CRL 75-36-700-3]	XP_003334614	8.54625e-20
25091	0	10	0.126722	1	RAB5C [PUCCINIA graminis f. sp. tritici CRL 75-36-700-3]	XP_003327295	1.95979e-25
23794	0	3	0.530267	1	ran GTPase-activating protein 1 [PUCCINIA graminis f. sp. tritici CRL 75-36-700-3] >gi|309308369|gb|EFP84960.1| HYPOTHETICAL protein PGTG_10431 [PUCCINIA graminis f. sp. tritici CRL 75-36-700-3]	XP_003329379	0.0227435
25126	0	2	0.66493	1	riboflavin kinase Fmn1 [PUCCINIA graminis f. sp. tritici CRL 75-36-700-3] >gi|309308535|gb|EFP85126.1| HYPOTHETICAL protein PGTG_11295 [PUCCINIA graminis f. sp. tritici CRL 75-36-700-3]	XP_003329545	5.39953e-26
26701	0	2	0.66493	1	ribonuclease T2 [PUCCINIA graminis f. sp. tritici CRL 75-36-700-3] >gi|309314319|gb|EFP90910.1| HYPOTHETICAL protein PGTG_17182 [PUCCINIA graminis f. sp. tritici CRL 75-36-700-3]	XP_003335329	0.00393738
25445	0	2	0.66493	1	ribose-phosphate pyrophosphokinase 4 [PUCCINIA graminis f. sp. tritici CRL 75-36-700-3] >gi|309302475|gb|EFP79066.1| ribose-phosphate pyrophosphokinase [PUCCINIA graminis f. sp. tritici CRL 75-36-700-3]	XP_003323485	4.37508e-05
25054	0	2	0.66493	1	RIBOSOMAL protein L28, putative [Phytophthora infestans T30-4] >gi|66270179|gb|AAY43419.1| RIBOSOMAL protein L28 [Phytophthora infestans] >gi|262108299|gb|EEY66351.1| RIBOSOMAL protein L28, putative [Phytophthora infestans T30-4]	XP_002906950	7.59425e-29
25623	0	3	0.530267	1	ribulose-phosphate 3-epimerase [PUCCINIA graminis f. sp. tritici CRL 75-36-700-3] >gi|309313161|gb|EFP89752.1| ribulose-phosphate 3-epimerase [PUCCINIA graminis f. sp. tritici CRL 75-36-700-3]	XP_003334171	4.83158e-19
24507	0	2	0.66493	1	RNA-binding protein [PUCCINIA graminis f. sp. tritici CRL 75-36-700-3] >gi|309300267|gb|EFP76858.1| HYPOTHETICAL protein PGTG_02319 [PUCCINIA graminis f. sp. tritici CRL 75-36-700-3]	XP_003321277	3.4977e-24
22052	0	6	0.285179	1	RNA-directed RNA polymerase 2 [PUCCINIA graminis f. sp. tritici CRL 75-36-700-3]	XP_003324286	1.1979e-06
23755	0	6	0.285179	1	S-(hydroxymethyl)glutathione dehydrogenase [PUCCINIA graminis f. sp. tritici CRL 75-36-700-3] >gi|309302745|gb|EFP79336.1| S-(hydroxymethyl)glutathione dehydrogenase/alcohol dehydrogenase [PUCCINIA graminis f. sp. tritici CRL 75-36-700-3]	XP_003323755	5.36759e-17
20585	0	10	0.126722	1	saccharopine dehydrogenase [PUCCINIA graminis f. sp. tritici CRL 75-36-700-3] >gi|309304742|gb|EFP81333.1| spermidine synthase [PUCCINIA graminis f. sp. tritici CRL 75-36-700-3]	XP_003325752	1.80474e-26
24455	0	3	0.530267	1	saccharopine dehydrogenase [PUCCINIA graminis f. sp. tritici CRL 75-36-700-3] >gi|309310389|gb|EFP86980.1| ubiquitin thiolesterase [PUCCINIA graminis f. sp. tritici CRL 75-36-700-3]	XP_003331399	6.04763e-31
22114	0	11	0.102862	1	secreted protein [Melam larici-populina 98AG31]	EGG07858	1.06102e-44
20621	0	9	0.15612	1	secreted protein [Melam larici-populina 98AG31]	EGG08429	0.000132458
23668	0	9	0.15612	1	secretory pathway GDP dissociation inhibitor 1 [PUCCINIA graminis f. sp. tritici CRL 75-36-700-3]	EFP81613	5.06209e-51
21526	0	7	0.232934	1	Septin-like protein [Melam larici-populina 98AG31]	EGG07389	6.37763e-44
21803	0	12	0.0835669	1	serine/threonine kinase receptor associated protein [PUCCINIA graminis f. sp. tritici CRL 75-36-700-3] >gi|309317763|gb|EFP94354.1| HYPOTHETICAL protein PGTG_20310 [PUCCINIA graminis f. sp. tritici CRL 75-36-700-3]	XP_003338773	9.88445e-46
20710	0	1	1	1	serine/threonine-protein phosphatase PP1-gamma catalytic subunit [PUCCINIA graminis f. sp. tritici CRL 75-36-700-3] >gi|309300318|gb|EFP76909.1| serine/threonine-protein phosphatase PP1 [PUCCINIA graminis f. sp. tritici CRL 75-36-700-3]	XP_003321328	1.98107e-19
25367	0	2	0.66493	1	short chain dehydrogenase [PUCCINIA graminis f. sp. tritici CRL 75-36-700-3] >gi|309306057|gb|EFP82648.1| glucose 1-dehydrogenase [PUCCINIA graminis f. sp. tritici CRL 75-36-700-3]	XP_003327067	5.82827e-32
24374	0	3	0.530267	1	similar to multidrug resistance protein [Aspergillus kawachii IFO 4308]	GAA83215	4.89291e-19
23184	0	2	0.66493	1	small nuclear ribonucleoprotein [PUCCINIA graminis f. sp. tritici CRL 75-36-700-3]	EFP74214	5.22514e-27
21674	0	3	0.530267	1	small nuclear ribonucleoprotein [PUCCINIA graminis f. sp. tritici CRL 75-36-700-3]	EFP84386	1.15307e-45
21030	0	13	0.0683089	1	small nuclear ribonucleoprotein F [PUCCINIA graminis f. sp. tritici CRL 75-36-700-3]	EFP87175	7.5312e-32
22231	0	5	0.350129	1	small nuclear ribonucleoprotein G [PUCCINIA graminis f. sp. tritici CRL 75-36-700-3]	EFP85350	3.79823e-39
22181	0	9	0.15612	1	small nuclear ribonucleoprotein Sm D2 [PUCCINIA graminis f. sp. tritici CRL 75-36-700-3] >gi|309312949|gb|EFP89540.1| small nuclear ribonucleoprotein Sm D2 [PUCCINIA graminis f. sp. tritici CRL 75-36-700-3] >gi|328861040|gb|EGG10144.1| HYPOTHETICAL protein MELLADRAFT_94522 [Melam larici-populina 98AG31]	XP_003333959	1.23981e-22
21368	0	10	0.126722	1	small subunit RIBOSOMAL protein S10e [PUCCINIA graminis f. sp. tritici CRL 75-36-700-3]	EFP87536	1.48185e-85
21681	0	3	0.530267	1	SNARE Ykt6 [PUCCINIA graminis f. sp. tritici CRL 75-36-700-3] >gi|309301778|gb|EFP78369.1| synaptobrevin YKT6 [PUCCINIA graminis f. sp. tritici CRL 75-36-700-3]	XP_003322788	2.29822e-59
22287	0	6	0.285179	1	SNW domain-containing protein 1 [PUCCINIA graminis f. sp. tritici CRL 75-36-700-3] >gi|375164830|gb|EFP93212.2| SNW domain-containing protein 1 [PUCCINIA graminis f. sp. tritici CRL 75-36-700-3]	EFP92291	7.0903e-24
25010	0	2	0.66493	1	splicing factor 3a subunit 2 [PUCCINIA graminis f. sp. tritici CRL 75-36-700-3] >gi|331250246|ref|XP_003337733.1| Sf3a2-prov protein [PUCCINIA graminis f. sp. tritici CRL 75-36-700-3] >gi|309303816|gb|EFP80407.1| HYPOTHETICAL protein PGTG_06363 [PUCCINIA graminis f. sp. tritici CRL 75-36-700-3] >gi|309316723|gb|EFP93314.1| HYPOTHETICAL protein PGTG_19269 [PUCCINIA graminis f. sp. tritici CRL 75-3…	XP_003324826	4.1657e-36
23289	0	5	0.350129	1	squalene monooxygenase [PUCCINIA striiformis f. sp. tritici]	AEM55573	3.94368e-06
26294	0	2	0.66493	1	STE/STE7/MEK1 protein kinase [PUCCINIA graminis f. sp. tritici CRL 75-36-700-3] >gi|309309221|gb|EFP85812.1| STE/STE7/MEK1 protein kinase [PUCCINIA graminis f. sp. tritici CRL 75-36-700-3]	XP_003330231	9.20657e-19
21319	0	2	0.66493	1	sterol 24-C-methyltransferase [PUCCINIA graminis f. sp. tritici CRL 75-36-700-3] >gi|309300151|gb|EFP76742.1| sterol 24-C-methyltransferase [PUCCINIA graminis f. sp. tritici CRL 75-36-700-3]	XP_003321161	2.3424e-08
26178	0	2	0.66493	1	sterol 24-C-methyltransferase [PUCCINIA graminis f. sp. tritici CRL 75-36-700-3] >gi|309314799|gb|EFP91390.1| sterol 24-C-methyltransferase [PUCCINIA graminis f. sp. tritici CRL 75-36-700-3]	XP_003335809	7.32386e-44
21994	0	8	0.191526	1	stress-induced-phosphoprotein 1 [PUCCINIA graminis f. sp. tritici CRL 75-36-700-3] >gi|309303921|gb|EFP80512.1| stress-induced-phosphoprotein 1 [PUCCINIA graminis f. sp. tritici CRL 75-36-700-3]	XP_003324931	1.36684e-38
22664	0	2	0.66493	1	succinate-semialdehyde dehydrogenase [PUCCINIA graminis f. sp. tritici CRL 75-36-700-3] >gi|309315000|gb|EFP91591.1| succinate-semialdehyde dehydrogenase (NADP+) [PUCCINIA graminis f. sp. tritici CRL 75-36-700-3]	XP_003336010	9.44477e-16
25532	0	4	0.430439	1	sugar transporter [PUCCINIA graminis f. sp. tritici CRL 75-36-700-3] >gi|309303382|gb|EFP79973.1| HYPOTHETICAL protein PGTG_05198 [PUCCINIA graminis f. sp. tritici CRL 75-36-700-3]	XP_003324392	4.1427e-05
25926	0	4	0.430439	1	TATA-box-binding protein [PUCCINIA graminis f. sp. tritici CRL 75-36-700-3] >gi|309298309|gb|EFP74900.1| TATA-box-binding protein [PUCCINIA graminis f. sp. tritici CRL 75-36-700-3]	XP_003319319	4.1809e-21
23488	0	3	0.530267	1	T-complex protein 1 subunit delta [PUCCINIA graminis f. sp. tritici CRL 75-36-700-3]	EFP81034	6.51203e-19
22532	0	3	0.530267	1	TGF-beta-inducible nuclear protein 1 [PUCCINIA graminis f. sp. tritici CRL 75-36-700-3]	XP_003328804	1.27517e-52
24499	0	12	0.0835669	1	thaumatin-like protein [Laccaria bicolor S238N-H82] >gi|164646087|gb|EDR10333.1| thaumatin-like protein [Laccaria bicolor S238N-H82]	XP_001878783	6.7125e-25
25048	0	1	1	1	thaumatin-like protein [Laccaria bicolor S238N-H82] >gi|164646087|gb|EDR10333.1| thaumatin-like protein [Laccaria bicolor S238N-H82]	XP_001878783	1.07567e-09
22984	0	3	0.530267	1	threonine dehydratase catabolic [PUCCINIA graminis f. sp. tritici CRL 75-36-700-3]	XP_003320447	3.86028e-49
24388	0	9	0.15612	1	transcription initiation factor Taf9 [PUCCINIA graminis f. sp. tritici CRL 75-36-700-3] >gi|309300153|gb|EFP76744.1| HYPOTHETICAL protein PGTG_02205 [PUCCINIA graminis f. sp. tritici CRL 75-36-700-3]	XP_003321163	9.8437e-24
21520	0	14	0.0560289	1	transketolase [PUCCINIA graminis f. sp. tritici CRL 75-36-700-3] >gi|309298109|gb|EFP74700.1| HYPOTHETICAL protein PGTG_00656 [PUCCINIA graminis f. sp. tritici CRL 75-36-700-3]	XP_003307706	1.69185e-38
20764	0	11	0.102862	1	translation initiation factor eIF-3 subunit 8 [PUCCINIA graminis f. sp. tritici CRL 75-36-700-3]	EFP83302	5.92543e-20
22720	0	1	1	1	triosephosphate isomerase [PUCCINIA graminis f. sp. tritici CRL 75-36-700-3] >gi|309297491|gb|EFP74082.1| triosephosphate isomerase [PUCCINIA graminis f. sp. tritici CRL 75-36-700-3]	XP_003307088	2.63601e-27
22721	0	10	0.126722	1	triosephosphate isomerase [PUCCINIA graminis f. sp. tritici CRL 75-36-700-3] >gi|309297491|gb|EFP74082.1| triosephosphate isomerase [PUCCINIA graminis f. sp. tritici CRL 75-36-700-3]	XP_003307088	7.13397e-48
22898	0	3	0.530267	1	tRNA-dihydrouridine synthase 2, partial [PUCCINIA graminis f. sp. tritici CRL 75-36-700-3]	EFP74185	0.373532
25389	0	4	0.430439	1	UBA domain-containing protein Mud1 [PUCCINIA graminis f. sp. tritici CRL 75-36-700-3]	XP_003336040	0.0469313
25094	0	2	0.66493	1	ubiquinone biosynthesis protein Coq4 [PUCCINIA graminis f. sp. tritici CRL 75-36-700-3] >gi|309304393|gb|EFP80984.1| HYPOTHETICAL protein PGTG_07236 [PUCCINIA graminis f. sp. tritici CRL 75-36-700-3]	XP_003325403	1.19357e-31
26142	0	2	0.66493	1	ubiquinone/menaquinone biosynthesis methyltransferase ubiE [PUCCINIA graminis f. sp. tritici CRL 75-36-700-3] >gi|309305346|gb|EFP81937.1| ubiquinone biosynthesis methyltransferase [PUCCINIA graminis f. sp. tritici CRL 75-36-700-3]	XP_003326356	2.84381e-40
22086	0	4	0.430439	1	ubiquitin carboxyl-terminal hydrolase 14 [PUCCINIA graminis f. sp. tritici CRL 75-36-700-3]	XP_003323276	2.82295e-42
22113	0	7	0.232934	1	ubiquitin conjugating enzyme Mms2 [PUCCINIA graminis f. sp. tritici CRL 75-36-700-3] >gi|309316817|gb|EFP93408.1| ubiquitin-conjugating enzyme E2 [PUCCINIA graminis f. sp. tritici CRL 75-36-700-3]	XP_003337827	2.73128e-27
23440	0	12	0.0835669	1	ubiquitin-conjugating enzyme E2 D3 [PUCCINIA graminis f. sp. tritici CRL 75-36-700-3]	XP_003321237	9.46957e-86
24924	0	2	0.66493	1	ubiquitin-like protein 1 [PUCCINIA graminis f. sp. tritici CRL 75-36-700-3]	EFP78163	1.05087e-31
24051	0	6	0.285179	1	UDP-glucose 4-epimerase [PUCCINIA graminis f. sp. tritici CRL 75-36-700-3] >gi|309303707|gb|EFP80298.1| UDP-glucose 4-epimerase [PUCCINIA graminis f. sp. tritici CRL 75-36-700-3]	XP_003324717	5.6703e-14
24469	0	1	1	1	vacuolar ATP synthase proteolipid subunit [Melam larici-populina 98AG31]	EGG10408	1.88756e-10
21126	0	14	0.0560289	1	vacuolar ATP synthase subunit B [PUCCINIA graminis f. sp. tritici CRL 75-36-700-3] >gi|309301619|gb|EFP78210.1| V-type proton ATPase subunit B [PUCCINIA graminis f. sp. tritici CRL 75-36-700-3]	XP_003322629	3.08735e-07
23356	0	2	0.66493	1	vacuolar ATP synthase subunit F [PUCCINIA graminis f. sp. tritici CRL 75-36-700-3] >gi|309303049|gb|EFP79640.1| V-type proton ATPase subunit F [PUCCINIA graminis f. sp. tritici CRL 75-36-700-3]	XP_003324059	7.34493e-17
22306	0	2	0.66493	1	vacuolar membrane protein [PUCCINIA graminis f. sp. tritici CRL 75-36-700-3]	XP_003321174	1.10831e-12
22360	0	10	0.126722	1	vacuolar protein-sorting-associated protein 46 [PUCCINIA graminis f. sp. tritici CRL 75-36-700-3]	XP_003324007	2.2381e-41
24246	0	4	0.430439	1	voltage-dependent anion-selective channel protein 3 [PUCCINIA graminis f. sp. tritici CRL 75-36-700-3] >gi|309309190|gb|EFP85781.1| HYPOTHETICAL protein PGTG_11110 [PUCCINIA graminis f. sp. tritici CRL 75-36-700-3]	XP_003330200	1.45719e-88
22108	0	11	0.102862	1	V-type ATPase, G subunit [PUCCINIA graminis f. sp. tritici CRL 75-36-700-3]	EFP76809	1.61537e-34
19551	0	5	0.350129	1	WD-repeat protein GhTTG4 [PUCCINIA graminis f. sp. tritici CRL 75-36-700-3]	XP_003307283	1.32365e-09
24179	0	3	0.530267	1	xaa-Pro aminopeptidase 2 [PUCCINIA graminis f. sp. tritici CRL 75-36-700-3]	XP_003323819	3.63156e-33
25669	0	5	0.350129	1	Xaa-Pro dipeptidase [Melam larici-populina 98AG31]	EGG02699	1.07045e-29
23749	0	2	0.66493	1	Yip1 domain family protein [PUCCINIA graminis f. sp. tritici CRL 75-36-700-3]	XP_003332298	2.48968e-25
22089	0	9	0.15612	1	z-protein [PUCCINIA graminis f. sp. tritici CRL 75-36-700-3] >gi|309306722|gb|EFP83313.1| HYPOTHETICAL protein PGTG_09266 [PUCCINIA graminis f. sp. tritici CRL 75-36-700-3]	XP_003327732	6.09037e-73
20058	1	12	0.175899	1	eukaryotic translation initiation factor 6 [PUCCINIA graminis f. sp. tritici CRL 75-36-700-3]	XP_003333101	2.94266e-55
20786	1	10	0.247053	1	HYPOTHETICAL protein MELLADRAFT_106888 [Melam larici-populina 98AG31]	EGG06204	2.83028e-19
25993	1	2	1	1	HYPOTHETICAL protein MELLADRAFT_116583 [Melam larici-populina 98AG31]	EGG06315	0.00431897
19669	1	3	0.813319	1	HYPOTHETICAL protein MELLADRAFT_42942 [Melam larici-populina 98AG31]	EGG08215	1.71717e-34
21596	1	2	1	1	HYPOTHETICAL protein MELLADRAFT_88536 [Melam larici-populina 98AG31]	EGG04789	2.0485e-08
26364	1	3	0.813319	1	HYPOTHETICAL protein MELLADRAFT_92800 [Melam larici-populina 98AG31]	EGG01053	1.32408e-20
3573	2	8	0.481862	1	HYPOTHETICAL protein MPER_03800 [Moniliophthora perniciosa FA553] >gi|215467827|gb|EEB96973.1| HYPOTHETICAL protein MPER_03800 [Moniliophthora perniciosa FA553]	XP_002396043	2.05743e-33
13219	3	14	0.277938	1	hsp10-like protein [PUCCINIA graminis f. sp. tritici CRL 75-36-700-3] >gi|309313194|gb|EFP89785.1| chaperonin GroS [PUCCINIA graminis f. sp. tritici CRL 75-36-700-3]	XP_003334204	1.33626e-34
contig 20936	0	15	Inf	0.0458924053019967	14-3-3 protein [Melampsora larici-populina]	ABS86198.1	1.96434E-37
contig 20756	0	98	Inf	4.36592192376888e-07	20S proteasome subunit beta 5 [Puccinia graminis f. sp. tritici CRL 75-36-700-3]	EFP88542.2	8.59725E-53
contig 21964	0	18	Inf	0.0251830715437496	40S ribosomal protein S2 [Puccinia graminis f. sp. tritici CRL 75-36-700-3]	XP_003324583.1	4.22746E-62
contig 22244	0	19	Inf	0.0206425492165012	40S ribosomal protein S12 [Puccinia graminis f. sp. tritici CRL 75-36-700-3]	XP_003321785.1	3.24651E-82
contig 6273	0	48	Inf	0.000145723207764768	40S ribosomal protein S13 [Puccinia graminis f. sp. tritici CRL 75-36-700-3]	XP_003330125.1	3.60816E-54
					40S ribosomal protein S13 [Vitis vinifera]	XP_002280012.1	7.54507E-45
contig 20823	0	20	Inf	0.0169402081329919	40S ribosomal protein S16 [Puccinia graminis f. sp. tritici CRL 75-36-700-3]	XP_003326144.1	1.45614E-74
contig 21692	0	21	Inf	0.0139215872311849	40s ribosomal protein S17 [Puccinia graminis f. sp. tritici CRL 75-36-700-3]	XP_003328165.1	6.3709E-67
contig 22117	0	18	Inf	0.0251830715437496	40S ribosomal protein S18 [Puccinia graminis f. sp. tritici CRL 75-36-700-3]	EFP78169.2	9.69336E-74
contig 22265	0	15	Inf	0.0458924053019967	40S ribosomal protein S21 [Puccinia graminis f. sp. tritici CRL 75-36-700-3]	EFP76105.1	2.27262E-49
contig 20896	0	29	Inf	0.00310661648658204	40S ribosomal protein S26 [Puccinia graminis f. sp. tritici CRL 75-36-700-3]	XP_003336790.1	4.22373E-52
contig 22304	0	23	Inf	0.00945079940402554	40S ribosomal protein S27 [Puccinia graminis f. sp. tritici CRL 75-36-700-3]	XP_003332938.1	2.38598E-53
contig 20705	0	46	Inf	0.000194835626971368	40S ribosomal protein S29 [Puccinia graminis f. sp. tritici CRL 75-36-700-3]	XP_003319907.1	1.0286E-25
contig 19670	0	18	Inf	0.0251830715437496	40S ribosomal protein S4 [Puccinia graminis f. sp. tritici CRL 75-36-700-3]	XP_003320811.1	1.04885E-27
contig 20845	0	38	Inf	0.000670177675389614	60S acidic ribosomal protein P2 [Ajellomyces dermatitidis SLH14081]	XP_002625564.1	4.35835E-21
contig 20469	0	32	Inf	0.00183081546989351	60S ribosomal protein L12 [Puccinia graminis f. sp. tritici CRL 75-36-700-3]	EFP89130.1	2.19966E-93
contig 22068	0	15	Inf	0.0458924053019967	60S ribosomal protein L13 [Puccinia graminis f. sp. tritici CRL 75-36-700-3]	XP_003319398.1	5.82315E-89
contig 20777	0	28	Inf	0.00372031277994912	60S ribosomal protein L14 [Puccinia graminis f. sp. tritici CRL 75-36-700-3]	XP_003329349.1	2.94613E-57
contig 22770	0	17	Inf	0.0307484746790804	60S ribosomal protein L4 [Puccinia graminis f. sp. tritici CRL 75-36-700-3]	XP_003326573.1	2.14247E-68
contig 21246	0	16	Inf	0.037562781469146	60S ribosomal protein L23 [Puccinia graminis f. sp. tritici CRL 75-36-700-3]	XP_003327910.1	8.72624E-39
					60S ri60S ribosomal protein L23 [Medicago truncatula]	XP_003589560.1	2.37081E-39
contig 23609	0	36	Inf	0.000929745940110805	50S ribosomal protein L24 [Puccinia graminis f. sp. tritici CRL 75-36-700-3]	XP_003333681.1	1.29367E-29
contig 21480	0	16	Inf	0.037562781469146	60S ribosomal protein L29 [Puccinia graminis f. sp. tritici CRL 75-36-700-3]	EFP87230.1	8.69085E-25
contig 23312	0	22	Inf	0.0114596479577379	60S ribosomal protein L32 [Puccinia graminis f. sp. tritici CRL 75-36-700-3]	XP_003329467.1	2.24325E-74
contig 21322	0	24	Inf	0.0078104689343816	60S ribosomal protein L33-B [Puccinia graminis f. sp. tritici CRL 75-36-700-3]	EFP84652.2	2.86288E-59
contig 21155	0	22	Inf	0.0114596479577379	60S ribosomal protein L34 [Puccinia graminis f. sp. tritici CRL 75-36-700-3]	XP_003321861.1	4.64873E-63
contig 26825	0	15	Inf	0.0458924053019967	60S ribosomal protein L37-A [Puccinia graminis f. sp. tritici CRL 75-36-700-3]	EFP82355.1	4.23271E-45
contig 20437	0	171	Inf	1.22903702363802e-09	60S ribosomal protein L6 [Puccinia graminis f. sp. tritici CRL 75-36-700-3]	XP_003307124.1	1.06158E-75
contig 21502	0	16	Inf	0.037562781469146	actin-3 [Pyrenophora tritici-repentis Pt-1C-BFP]	XP_001934335.1	5.10171E-48
contig 20932	0	21	Inf	0.0139215872311849	actin lateral binding protein [Puccinia graminis f. sp. tritici CRL 75-36-700-3]	XP_003335102.1	5.12601E-65
contig 21519	0	15	Inf	0.0458924053019967	acyl-CoA desaturase [Puccinia graminis f. sp. tritici CRL 75-36-700-3]	XP_003324118.1	2.19672E-27
					delta-9 fatty acid desaturase [Puccinia graminis f. sp. tritici CRL 75-36-700-3]	XP_003326562.1	3.01578E-27
contig 20636	0	50	Inf	0.000109774040017283	ADP,ATP carrier protein [Puccinia graminis f. sp. tritici CRL 75-36-700-3]	XP_003333027.1	1.03287E-94
contig 24905	0	15	Inf	0.0458924053019967	aflatoxin B1-aldehyde reductase [Aspergillus niger CBS 513.88]	XP_001392759.1	8.84847E-20
contig 21783	0	26	Inf	0.00536818296330212	argonaute-like protein [Puccinia striiformis f. sp. tritici]	AEM61140.1	6.05978E-68
					Os04g0566500 [Oryza sativa Japonica Group]	NP_001174050.1	2.5319E-31
contig 21597	0	23	Inf	0.00945079940402554	bax Inhibitor family protein [Coprinopsis cinerea okayama7#130]	XP_001829327.2	4.73121E-44
					hypothetical protein PGTG_12297 [Puccinia graminis f. sp. tritici CRL 75-36-700-3]	XP_003330760.1	1.74748E-56
contig 20815	0	24	Inf	0.0078104689343816	calmodulin [Puccinia graminis f. sp. tritici CRL 75-36-700-3]	XP_003329587.1	5.20148E-29
					calmodulin [Zea mays]	NP_001148310.1	3.81757E-26
contig 21192	0	21	Inf	0.0139215872311849	calnexin [Puccinia graminis f. sp. tritici CRL 75-36-700-3]	EFP80305.1	1.02803E-25
					calreticulin precursor [Pyrenophora tritici-repentis Pt-1C-BFP]	XP_001938332.1	8.07607E-5
contig 23545	0	15	Inf	0.0458924053019967	CK1/CK1/CK1-D protein kinase [Puccinia graminis f. sp. tritici CRL 75-36-700-3]	EFP79961.2	6.0714E-24
					casein kinase, putative [Coccidioides posadasii C735 delta SOWgp]	XP_003068968.1	1.17131E-20
contig 20409	0	87	Inf	1.31382625611982e-06	chitinase [Puccinia graminis f. sp. tritici CRL 75-36-700-3]	XP_003323812.1	7.2383E-18
contig 20612	0	36	Inf	0.000929745940110805	cyclophilin [Piriformospora indica]	ACS71332.1	3.79957E-6
contig 9811	0	20	Inf	0.0169402081329919	cellulase [Puccinia graminis f. sp. tritici CRL 75-36-700-3]	XP_003320011.1	1.00524E-17
contig 23265	0	20	Inf	0.0169402081329919	diazepam-binding inhibitor (GABA receptor modulator, acyl-CoA-binding protein) [Puccinia graminis f. sp. tritici CRL 75-36-700-3]	EFP76926.2	2.38335E-40
					long-chain fatty acid transporter [Cryptococcus neoformans var. neoformans JEC21]	XP_568458.1	7.08219E-24
contig 20765	0	18	Inf	0.0251830715437496	dynein light chain LC8-type [Puccinia graminis f. sp. tritici CRL 75-36-700-3]	EHS62839.1	2.62577E-29
contig 20574	0	73	Inf	6.03815163268131e-06	elongation factor 1-alpha [Puccinia graminis f. sp. tritici CRL 75-36-700-3]	XP_003333072.1	6.36301E-41
contig 21376	0	20	Inf	0.0169402081329919	eukaryotic translation initiation factor 3 [Puccinia graminis f. sp. tritici CRL 75-36-700-3]	XP_003336499.1	3.00803E-38
					unnamed protein product [Vitis vinifera]	CBI16056.3	5.91623E-14
contig 20405	0	27	Inf	0.00446433464350521	eukaryotic translation initiation factor 5A [Puccinia graminis f. sp. tritici CRL 75-36-700-3]	XP_003327437.1	4.35195E-27
contig 24182	0	15	Inf	0.0458924053019967	enolase [Puccinia graminis f. sp. tritici CRL 75-36-700-3]	XP_003333481.1	6.64161E-64
					enolase [Cocos nucifera]	AAZ66618.1	6.45863E-40
contig 21748	0	33	Inf	0.00154104078590505	family 26 glycoside hydrolase [Melampsora larici-populina 98AG31]	EGG04511.1	2.54709E-33
contig 20393	0	36	Inf	0.000929745940110805	family 26 glycoside hydrolase [Melampsora larici-populina 98AG31]	EGG05341.1	2.67366E-14
contig 21762	0	22	Inf	0.0114596479577379	FK506-binding protein 1 [Puccinia graminis f. sp. tritici CRL 75-36-700-3]	EFP86396.2	1.35685E-43
contig 21735	0	28	Inf	0.00372031277994912	Fe-Mn family superoxide dismutase, variant [Puccinia graminis f. sp. tritici CRL 75-36-700-3]	EHS62543.1	1.32594E-62
contig 24552	0	46	Inf	0.000194835626971368	glucose-repressible protein [Puccinia graminis f. sp. tritici CRL 75-36-700-3]	XP_003323185.1	4.57296E-23
contig 22914	0	25	Inf	0.00646842492734455	glutathione S-transferase [Coprinopsis cinerea okayama7#130]	XP_001832456.2	8.83268E-18
contig 20473	0	38	Inf	0.000670177675389614	glyceraldehyde-3-phosphate dehydrogenase [Puccinia graminis f. sp. tritici CRL 75-36-700-3]	EFP79000.2	1.35603E-19
contig 23419	0	168	Inf	1.50852103230269e-09	glyceraldehyde-3-phosphate dehydrogenase [Puccinia graminis f. sp. tritici CRL 75-36-700-3]	EFP79000.2	3.44117E-18
contig 20739	0	39	Inf	0.00057058260002929	heat shock protein 82 [Puccinia graminis f. sp. tritici CRL 75-36-700-3]	XP_003320564.1	2.28729E-32
contig 24967	0	212	Inf	9.32570976494095e-11	heat shock protein Hsp88 [Puccinia graminis f. sp. tritici CRL 75-36-700-3]	XP_003324173.1	5.47513E-18
contig 21024	0	57	Inf	4.26575852469926e-05	heat shock protein HSS1 [Puccinia graminis f. sp. tritici CRL 75-36-700-3]	XP_003333898.1	1.00457E-36
contig 20568	0	26	Inf	0.00536818296330212	histone [Puccinia graminis f. sp. tritici CRL 75-36-700-3]	EFP74437.1	1.00539E-85
contig 20945	0	33	Inf	0.00154104078590505	histone H2A.1 [Puccinia graminis f. sp. tritici CRL 75-36-700-3]	XP_003334916.1	3.54044E-40
contig 16777	0	42	Inf	0.000356034528634138	histone H3 [Puccinia graminis f. sp. tritici CRL 75-36-700-3]	XP_003329546.1	1.06639E-34
contig 20910	0	49	Inf	0.000126365576798691	histone H4 [Puccinia graminis f. sp. tritici CRL 75-36-700-3]	XP_003307442.1	6.78851E-33
contig 22030	0	51	Inf	9.55273917467161e-05	histone H4 [Puccinia graminis f. sp. tritici CRL 75-36-700-3]	XP_003307442.1	1.45099E-28
contig 20933	0	18	Inf	0.0251830715437496	hypothetical protein [Melampsora medusae f. sp. deltoidis]	ABS86497.1	1.43299E-14
contig 21685	0	23	Inf	0.00945079940402554	hypothetical protein MELLADRAFT_103368 [Melampsora larici-populina 98AG31]	EGG10401.1	7.24821E-4
contig 20767	0	15	Inf	0.0458924053019967	hypothetical protein MELLADRAFT_57488 [Melampsora larici-populina 98AG31]	EGG01052.1	3.22231E-10
contig 21135	0	20	Inf	0.0169402081329919	hypothetical protein MELLADRAFT_64879 [Melampsora larici-populina 98AG31]	EGG04489.1	1.33798E-22
contig 4131	0	16	Inf	0.037562781469146	hypothetical protein MELLADRAFT_95625 [Melampsora larici-populina 98AG31]	EGF98539.1	1.97792E-36
contig 21169	0	71	Inf	7.60598748568765e-06	hypothetical protein PGTG_04963 [Puccinia graminis f. sp. tritici CRL 75-36-700-3]	EFP79007.2	4.09075E-4
contig 20827	0	29	Inf	0.00310661648658204	hypothetical protein PGTG_05061 [Puccinia graminis f. sp. tritici CRL 75-36-700-3]	XP_003324255.1	1.67743E-23
contig 21379	0	50	Inf	0.000109774040017283	hypothetical protein PGTG_17088 [Puccinia graminis f. sp. tritici CRL 75-36-700-3]	EFP90889.2	1.01234E-13
contig 21143	0	16	Inf	0.037562781469146	hypothetical protein PGTG_18848 [Puccinia graminis f. sp. tritici CRL 75-36-700-3]	XP_003337426.1	4.4998E-16
contig 20526	0	21	Inf	0.0139215872311849	hypothetical protein PGTG_21437 [Puccinia graminis f. sp. tritici CRL 75-36-700-3]	EHS63107.1	9.33655E-19
contig 20735	0	35	Inf	0.00109820058220995	hypothetical protein SMAC_09197 [Sordaria macrospora k-hell]	XP_003344790.1	2.99802E-49
contig 22381	0	18	Inf	0.0251830715437496	hypothetical protein UM02729.1 [Ustilago maydis 521]	XP_758876.1	2.25339E-5
contig 21795	0	20	Inf	0.0169402081329919	hypothetical protein PGTG_12628 [Puccinia graminis f. sp. tritici CRL 75-36-700-3]	XP_003331306.1	2.1832E-41
					Brain protein 44 [Salmo salar]	ACM08679.1	3.63137E-24
contig 21095	0	33	Inf	0.00154104078590505	hypothetical protein PGTG_14260 [Puccinia graminis f. sp. tritici CRL 75-36-700-3]	EFP88176.2	1.67342E-41
					C2H2 finger domain-containing protein FlbC [Magnaporthe oryzae 70-15]	EHA53875.1	2.43267E-13
contig 23376	0	16	Inf	0.037562781469146	hypothetical protein PGTG_00252 [Puccinia graminis f. sp. tritici CRL 75-36-700-3]	XP_003307302.1	1.57718E-32
					cipC protein [Aspergillus niger CBS 513.88]	XP_001393387.	5.19809E-18
contig 22952	0	15	Inf	0.0458924053019967	hypothetical protein PGTG_00962 [Puccinia graminis f. sp. tritici CRL 75-36-700-3]	XP_003320050.1	1.7824E-19
contig 22470	0	23	Inf	0.00945079940402554	hypothetical protein PGTG_00962 [Puccinia graminis f. sp. tritici CRL 75-36-700-3]	XP_003320050.1	1.31727E-49
contig 21636	0	18	Inf	0.0251830715437496	hypothetical protein PGTG_07030 [Puccinia graminis f. sp. tritici CRL 75-36-700-3]	XP_003325828.1	9.80914E-28
contig 20537	0	16	Inf	0.037562781469146	hypothetical protein PGTG_00744 [Puccinia graminis f. sp. tritici CRL 75-36-700-3]	EFP75413.2	2.4212E-23
					E3 ubiquitin-protein ligase [Schizosaccharomyces pombe 972h-]	NP_594902.1	5.39385E-12
contig 21088	0	25	Inf	0.00646842492734455	hypothetical protein PGTG_02896 [Puccinia graminis f. sp. tritici CRL 75-36-700-3]	XP_003320874.1	3.61849E-54
					galactose-proton symport [Aspergillus niger CBS 513.88]	XP_001394147.2	8.01943E-28
contig 22452	0	16	Inf	0.037562781469146	hypothetical protein PGTG_01210 [Puccinia graminis f. sp. tritici CRL 75-36-700-3]	XP_003320298.1	1.98665E-37
contig 22631	0	18	Inf	0.0251830715437496	hypothetical protein PGTG_01615 [Puccinia graminis f. sp. tritici CRL 75-36-700-3]	XP_003319441.1	1.39878E-16
contig 22189	0	23	Inf	0.00945079940402554	hypothetical protein PGTG_06636 [Puccinia graminis f. sp. tritici CRL 75-36-700-3]	XP_003325099.1	2.30864E-28
contig 20862	0	18	Inf	0.0251830715437496	hypothetical protein MELLADRAFT_71355 [Melampsora larici-populina 98AG31]	EGG08845.1	1.16299E-84
contig 1371	0	20	Inf	0.0169402081329919	hypothetical protein PGTG_02389 [Puccinia graminis f. sp. tritici CRL 75-36-700-3]	XP_003321347.1	1.79523E-9
contig 22176	0	27	Inf	0.00446433464350521	hypothetical protein PGTG_14060 [Puccinia graminis f. sp. tritici CRL 75-36-700-3]	XP_003324670.1	1.64781E-40
contig 20496	0	88	Inf	1.18476112355671e-06	hypothetical protein PGTG_06207 [Puccinia graminis f. sp. tritici CRL 75-36-700-3]	XP_003324670.1	1.64781E-40
contig 22062	0	29	Inf	0.00310661648658204	hypothetical protein PGTG_11239 [Puccinia graminis f. sp. tritici CRL 75-36-700-3]	XP_003329489.1	7.25817E-8
contig 21476	0	15	Inf	0.0458924053019967	hypothetical protein PGTG_07760 [Puccinia graminis f. sp. tritici CRL 75-36-700-3]	XP_003325930.	2.41751E-28
contig 21240	0	24	Inf	0.0078104689343816	hypothetical protein PGTG_08189 [Puccinia graminis f. sp. tritici CRL 75-36-700-3]	EFP81940.2	1.79625E-24
contig 21399	0	21	Inf	0.0139215872311849	hypothetical protein PGTG_13383 [Puccinia graminis f. sp. tritici CRL 75-36-700-3]	XP_003331583.1	1.71273E-24
contig 20916	0	90	Inf	9.6537496533948e-07	hypothetical protein PGTG_04481 [Puccinia graminis f. sp. tritici CRL 75-36-700-3]	XP_003322944.1	4.8066E-26
contig 20400	0	117	Inf	7.65928609305116e-08	hypothetical protein PGTG_10268 [Puccinia graminis f. sp. tritici CRL 75-36-700-3]	EFP84797.2	1.68698E-21
contig 20879	0	18	Inf	0.0251830715437496	hypothetical protein PGTG_19738 [Puccinia graminis f. sp. tritici CRL 75-36-700-3]	XP_003338385.1	2.61494E-19
contig 24253	0	46	Inf	0.000194835626971368	hypothetical protein MELLADRAFT_90062 [Melampsora larici-populina 98AG31]	EGG03637.1	3.61437E-27
					putative senescence-associated protein [Pisum sativum]	BAB33421.1	4.97278E-11
contig 22318	0	15	Inf	0.0458924053019967	hypothetical protein PGTG_18600 [Puccinia graminis f. sp. tritici CRL 75-36-700-3]	EFP92601.2	7.13738E-40
contig 21731	0	40	Inf	0.000486685216352793	hypothetical protein PGTG_01513 [Puccinia graminis f. sp. tritici CRL 75-36-700-3]	XP_003319339.1	1.21103E-70
contig 21660	0	35	Inf	0.00109820058220995	hypothetical protein PGTG_12858 [Puccinia graminis f. sp. tritici CRL 75-36-700-3]	XP_003331693.1	6.34262E-40
					related to GIS2-putative zinc finger protein, proposed to be involved in the RAS/cAMP signaling pathway [Piriformospora indica DSM 11827]	CCA68045.1	1.10585E-34
contig 21339	0	21	Inf	0.0139215872311849	hypothetical protein PGTG_07129 [Puccinia graminis f. sp. tritici CRL 75-36-700-3]	XP_003325296.1	4.87326E-58
					60S ribosomal protein L28 [Postia placenta Mad-698-R]	XP_002474482.1	1.39966E-20
contig 20893	0	53	Inf	7.26464869858471e-05	inorganic phosphate transporter 1-7/Pi cotransporter [Puccinia graminis f. sp. tritici CRL 75-36-700-3]	XP_003319743.1	8.01074E-69
contig 21895	0	16	Inf	0.037562781469146	large subunit ribosomal protein L35e [Puccinia graminis f. sp. tritici CRL 75-36-700-3]	EFP87143.1	1.88599E-60
contig 20727	0	36	Inf	0.000929745940110805	large subunit ribosomal protein L38e [Puccinia graminis f. sp. tritici CRL 75-36-700-3]	EFP92848.1	5.63503E-28
contig 21527	0	18	Inf	0.0251830715437496	malate dehydrogenase [Puccinia graminis f. sp. tritici CRL 75-36-700-3]	XP_003323328.1	5.61317E-53
contig 23594	0	221	Inf	5.56273888653773e-11	malate dehydrogenase [Puccinia graminis f. sp. tritici CRL 75-36-700-3]	XP_003335365.1	2.37073E-15
contig 21934	0	21	Inf	0.0139215872311849	nucleoside diphosphate kinase [Puccinia graminis f. sp. tritici CRL 75-36-700-3]	EFP78707.2	5.31076E-91
contig 20891	0	18	Inf	0.0251830715437496	omega-6 fatty acid desaturase (delta-12 desaturase) [Puccinia graminis f. sp. tritici CRL 75-36-700-3]	EFP74165.1	4.78688E-12
contig 20427	0	20	Inf	0.0169402081329919	omega-6 fatty acid desaturase (delta-12 desaturase) [Puccinia graminis f. sp. tritici CRL 75-36-700-3]	XP_003307138.1	4.86191E-44
contig 20625	0	53	Inf	7.26464869858471e-05	pheromone precursor with four tandem repeats of a putative pheromone peptide [Melampsora larici-populina 98AG31]	EGF98299.1	2.99903E-7
contig 20757	0	94	Inf	6.4599004237738e-07	phosphoribosylformylglycinamidine cyclo-ligase [Puccinia graminis f. sp. tritici CRL 75-36-700-3]	XP_003326142.1	8.57432E-24
contig 20474	0	29	Inf	0.00310661648658204	plasma membrane proteolipid 3 [Puccinia graminis f. sp. tritici CRL 75-36-700-3]	XP_003332609.1	2.77343E-23
contig 21941	0	38	Inf	0.000670177675389614	polyadenylate-binding protein [Puccinia graminis f. sp. tritici CRL 75-36-700-3]	XP_003329214.1	2.14648E-11
contig 21020	0	18	Inf	0.0251830715437496	proteasome subunit 1 [Puccinia graminis f. sp. tritici CRL 75-36-700-3]	XP_003328491.1	7.2059E-70
contig 20804	0	21	Inf	0.0139215872311849	protein SSD1 [Puccinia graminis f. sp. tritici CRL 75-36-700-3]	XP_003324138.1	1.02396E-39
contig 21842	0	26	Inf	0.00536818296330212	ribosomal protein S28 [Trichoderma reesei QM6a]	EHK22681.1	9.51322E-18
contig 21115	0	16	Inf	0.037562781469146	secreted protein [Melampsora larici-populina 98AG31]	EGG09874.1	8.12513E-9
contig 20620	0	17	Inf	0.0307484746790804	small subunit ribosomal protein S30e [Puccinia graminis f. sp. tritici CRL 75-36-700-3]	EFP88720.1	2.32357E-33
contig 21407	0	34	Inf	0.00129965799339571	S-methylmethionine permease 1 [Puccinia graminis f. sp. tritici CRL 75-36-700-3]	XP_003334572.1	1.72777E-17
contig 20485	0	18	Inf	0.0251830715437496	subtilase-type proteinase psp3 [Puccinia graminis f. sp. tritici CRL 75-36-700-3]	XP_003333145.1	2.09777E-16
contig 13789	6	386	6.00749453654692	1.45433959459971e-10	thaumatin-like protein [Melampsora larici-populina 98AG31]	EGG07361.1	4.74696E-131
contig 20691	0	17	Inf	0.0307484746790804	thiamine biosynthesis protein [Puccinia graminis f. sp. tritici CRL 75-36-700-3]	XP_003328850.1	1.39703E-9
contig 21528	0	34	Inf	0.00129965799339571	thiazole biosynthetic enzyme, mitochondrial [Puccinia graminis f. sp. tritici CRL 75-36-700-3]	EFP75973.1	1.42902E-6
contig 22279	0	29	Inf	0.00310661648658204	thiazole biosynthetic enzyme, mitochondrial [Puccinia graminis f. sp. tritici CRL 75-36-700-3]	EFP75973.1	5.3633E-19
contig 22326	0	40	Inf	0.000486685216352793	thioesterase/thiol ester dehydrase-isomerase, partial [Neurospora tetrasperma FGSC 2509]	EGZ68231.1	4.99776E-24
contig 22476	0	19	Inf	0.0206425492165012	ubiquitin-conjugating enzyme E2 [Puccinia graminis f. sp. tritici CRL 75-36-700-3]	XP_003329595.1	5.35522E-61
contig 20527	0	20	Inf	0.0169402081329919	ubiquitin-conjugating enzyme E2 8 [Puccinia graminis f. sp. tritici CRL 75-36-700-3]	EFP80225.2	1.10878E-9
contig 20811	0	23	Inf	0.00945079940402554	vacuolar protease A [Puccinia graminis f. sp. tritici CRL 75-36-700-3]	XP_003320537.1	3.98842E-53

## Sheet: UP regulated A. coronaria
Contig ID	baseMeanA	baseMeanB	log2FoldChange	pval	Blast result	E-value	ACC number	GO biological process	GO cellular component	GO molecular function	GO number
Pathogenesis related protein (PR)
contig 3404	10	120	3.58496250072116	0.000271248013397648	acidic endochitinase [Vitis vinifera]	7.65543E-44	XP_003634089.1	chitin catabolic process; cell wall macromolecule catabolic process;	vacuole;	chitinase activity; cation binding; lysozyme activity;	4568 5773 6032 43169 3796 16998
					chitinase [Hevea brasiliensis]	2.28307E-46	CAA09110.1
contig 3405	19	82	2.1096244911745	0.0282368551316716	acidic endochitinase [Vitis vinifera]	7.65543E-44	XP_003634089.1	chitin catabolic process; cell wall macromolecule catabolic process;	vacuole;	chitinase activity; cation binding; lysozyme activity;	4568 5773 6032 43169 3796 16998
					chitinase [Hevea brasiliensis]	2.28307E-46	CAA09110.1
contig 12644	13	131	3.33298328339636	0.000407420093030694	chitinase 6 [Populus x canadensis]	7.94485E-14	AEZ67305.1	chitin catabolic process; cell wall macromolecule catabolic process;	vacuole;	chitinase activity; cation binding; lysozyme activity;	4568 5773 6032 43169 3796 16998
contig 18322	0	19	Inf	0.0206425492165012	bacterial-induced peroxidase [Gossypium hirsutum]	3.47095E-65	ADY68831.1			metal ion binding; oxidoreductase activity;	46872 16491
contig 23995	0	29	Inf	0.00310661648658204	peroxidase N1-like [Vitis vinifera]	2.86591E-13	XP_003633366.1	hydrogen peroxide catabolic process; oxidation reduction; peroxidase reaction;	extracellular region;	heme binding; peroxidase activity;	42744 20037 55114 4601 5576 6804
					bacterial-induced peroxidase [Gossypium hirsutum]	8.68047E-12	ADY68831.1
contig 7408	5	39	2.96347412397489	0.0260867536794388	defensin-like protein 13 [Arabidopsis thaliana]	1.27768E-33	NP_565119.1	defense response to fungus; killing of cells of another organism;	extracellular region;		5576 50832 31640
contig 18538	1	22	4.4594316186373	0.0322127979027649	metallothionein protein, partial [Malus x domestica]	3.34621E-6	AEX97102.1
contig 23407	22	221	3.32847094075413	7.57505946739227e-05	MLP-like protein 28-like [Vitis vinifera]	8.08825E-20	XP_002284527.1
contig 8437	1	37	5.20945336562895	0.00298236372585071	S-norcoclaurine synthase-like [Brachypodium distachyon]	5.79013E-19	XP_003580488.1
contig 8595	8	211	4.72109918870718	6.48432994558772e-07	thionin precursor [Brassica napus]	1.16416E-30	ACJ68108.1
R gene
contig 21204	0	17	Inf	0.0307484746790804	polygalacturonase inhibitor-like [Glycine max]	5.08113E-40	XP_003554195.1		extracellular region;		5576
Jasmonate signalling
contig 13806	2	26	3.70043971814109	0.0333605631206671	12-oxophytodienoate reductase 2 isoform 1 [Vitis vinifera] - OPR1	6.8E-93	XP_002281348.1	metabolic process		fmn binding; oxidoreductase activity;	10181 16491 8152
contig 19374	126	339	1.42786153963643	0.0407645133999913	ji23_horvu ame: full=23 kda jasmonate-induced protein	3.3126E-4	P32024.1
contig 23031	0	15	Inf	0.0458924053019967	acyl-CoA oxidase, putative [Ricinus communis]	1.43874E-42	XP_002525155.	fatty acid beta-oxidation; electron transport; acyl-CoA metabolic process; mitochondrial electron transport, cytochrome c to oxygen; proton transport;	peroxisome; respiratory chain complex IV;	FAD binding; acyl-CoA dehydrogenase activity; acyl-CoA oxidase activity; cytochrome-c oxidase activity;	50660 5777 6635 3995 3997 4129 6118 6637 6123 15992 45277
contig 6457	23	84	1.86875546672175	0.0461092582826549	jasmonate induced protein [Hordeum vulgare subsp. vulgare]	9.96769E-12	CAA58110.1
contig 9769	2	25	3.64385618977472	0.0386546362381115	protein TIFY 3B [Medicago truncatula]	4.35412E-25	XP_003595389.1			protein binding;	5515
					ZIM motif-containing protein [Triticum aestivum]	4.90047E-27	ABK63978.1
contig 8158					adipocyte plasma membrane-associated protein [Vitis vinifera]	2.11304E-56	XP_002277807.1	terpenoid biosynthetic process; indole biosynthetic process;		strictosidine synthase activity;	16844 16114 42432
	5	93	4.21723071622067	0.000164945705864722	strictosidine synthase 1 precursor [Zea mais]	2.3E-35	ACG46069.1	indol biosynthetic process; terpenoid biosynthetic process		strictosidine synthase activity	16844 16114 42432
Additional genes involved in defense response
contig 12518	32	105	1.71424551766612	0.0502373206965831	caffeic acid 3-O-methyltransferase [Vitis vinifera]	5.44181E-46	XP_002264566.1	coumarin biosynthetic process; lignin biosynthetic process; stilbene biosynthetic process;		protein dimerization activity; caffeate O-methyltransferase activity;	46983 47763 9805 9809 9811
contig 21028	0	22	Inf	0.0114596479577379	cytochrome P450, putative [Ricinus communis]	7.67381E-8	XP_002528002.1	oxidation reduction; electron transport; diterpenoid biosynthetic process;		heme binding; electron carrier activity; taxane 13-alpha-hydroxylase activity;	20037 55114 9055 50598 6118 16102
contig 14087	14	81	2.53249508082702	0.0112943432147517	early responsive to dehydration [Fagus sylvatica]	5.02011E-38	CBY94070.1
contig 18377	0	20	Inf	0.0169402081329919	Flavonol synthase/flavanone 3-hydroxylase, putative [Ricinus communis]	9.1206E-31	XP_002519766	oxidation reduction;		flavonol synthase activity;	55114 45431
contig 27078	0	27	Inf	0.00446433464350521	heat shock protein 90 kDa [Pseudotsuga menziesii]	7.48192E-8	ACH59910.1	protein folding; response to stress;	cytoplasm;	unfolded protein binding; ATP binding;	6457 5737 51082 5524 6950
contig 4670	6	57	3.24792751344359	0.00639029200866367	23.6 kDa heat shock protein, mitochondrial isoform 1 [Vitis vinifera]	5.24504E-56	XP_002267332.1	response to stress;	chloroplast;		6950 9507
contig 14547	60	176	1.55254102302878	0.0455837860897147	lipid binding protein, putative [Ricinus communis]	9.1821E-53	XP_002521893.1	lipid transport;	cytoplasmic membrane-bounded vesicle;
contig 10361	0	20	Inf	0.0169402081329919	SNARE-interacting protein KEULE [Arabidopsis thaliana]	1.28163E-21	NP_563905.1	vesicle docking during exocytosis;		protein binding;	6904 5515
contig 6685	21	79	1.91146332539834	0.045530504923627	alpha-1,4-glucan-protein synthase [Oryza sativa Indica Group]	2.90453E-92	ABR26070.1	cellulose biosynthetic process; cellular cell wall organization;	plant-type cell wall; Golgi apparatus; plasmodesma; extracellular region;	glycogenin glucosyltransferase activity;	9505 5794 9506 30244 8466 5576 7047
					UDP-glucose:protein transglucosylase-like [Solanum tuberosum]	1.40648E-94	ABA81861.1
Ribosomal
contig 23227	12	62	2.36923380966572	0.0263701661693849	40S ribosomal protein S3-3 [Vitis vinifera]	7.87599E-23	XP_002275541.1	translation; ribosome biogenesis;	small ribosomal subunit;	structural constituent of ribosome; RNA binding;	3735 3723 15935 6412 42254
contig 18025	4	43	3.4262647547021	0.0108358955911498	60S ribosomal protein L14-2-like [Vitis vinifera]	1.07637E-45	XP_002267370.1	translation; ribosome biogenesis;	ribosome;	structural constituent of ribosome;	5840 3735 6412 42254
contig 6465	3	29	3.27301849440642	0.0370357041117233	Mitochondrial ribosomal protein L27 [Arabidopsis thaliana]	2.45332E-39	NP_568574.1
contig 566	59	176	1.57678856927546	0.0426263549638889	ribosomal protein L29 [Panax ginseng]	7.86222E-28	BAA96072.1	translation; ribosome biogenesis;	ribosome;	structural constituent of ribosome;	5840 3735 6412 42254
					60S ribosomal protein L29-1 [Vitis vinifera]	4.57531E-26	XP_002276776.1
Other genes
contig 21276	0	15	Inf	0.0458924053019967	ABA glucosyltransferase [Citrus sinensis]	6.87044E-17	AEX15515.1			transferase activity, transferring hexosyl groups;	16758
contig 17326	1	29	4.85798099512757	0.0102191418763257	aspartate-semialdehyde dehydrogenase-like [Glycine max]	2.8281E-42	XP_003530928.1	threonine biosynthetic process; methionine biosynthetic process; oxidation reduction; glycine metabolic process; L-serine metabolic process; lysine biosynthetic process;	plastid;	NAD or NADH binding; aspartate-semialdehyde dehydrogenase activity; NADP or NADPH binding; protein dimerization activity;	9088 51287 4073 50661 46983 9086 55114 9536 6544 6563 9085
contig 11834	2	24	3.58496250072116	0.0448228525500705	ATPase, V0 complex, subunit E [Arabidopsis thaliana]	1.5514E-32	NP_568823.1	ATP hydrolysis coupled proton transport;	cytoplasmic membrane-bounded vesicle; proton-transporting V-type ATPase, V0 domain;	hydrolase activity; hydrogen ion transmembrane transporter activity;	15991 16023 33179 16787 15078
contig 609	11	68	2.62803122261304	0.0132666871800883	chloroplast Cu/Zn superoxide dismutase [Viola mandshurica]	1.19687E-35	AEK28674.1	oxidation reduction; superoxide metabolic process;	chloroplast;	metal ion binding; superoxide dismutase activity;	46872 55114 6801 4784 9507
contig 6980	0	18	Inf	0.0251830715437496	GDP-mannose 4,6-dehydratase [Nicotiana benthamiana]	3.64431E-87	BAH10700.2	fructose metabolic process; galactose metabolic process; GDP-mannose biosynthetic process;	intracellular;	GDP-mannose 4,6-dehydratase activity; coenzyme binding;	8446 5622 50662 6000 6012 9298
contig 20713	0	29	Inf	0.00310661648658204	geranylgeranyl diphosphate synthase [Nicotiana tabacum]	1.02762E-51	ADD49735.1	oxidation reduction; steroid biosynthetic process; terpenoid biosynthetic process;		farnesyltranstransferase activity; 2-alkenal reductase activity; dimethylallyltranstransferase activity;	55114 4311 32440 4161 6694 16114
contig 23146	0	15	Inf	0.0458924053019967	GTPase obg-like [Vitis vinifera]	3.75459E-18	XP_002276482.1		plastid;		9536
contig 4728	2	27	3.75488750216347	0.0288147949009923	mRNA turnover protein 4 homolog [Vitis vinifera]	3.91983E-53	XP_002276595.1	ribosome biogenesis;	ribosome;		5840 42254
contig 12271	0	21	Inf	0.0139215872311849	MtN19 protein [Medicago truncatula]	9.64549E-46	XP_003594550.1		cytoplasmic membrane-bounded vesicle;		16023
contig 19161	1	23	4.52356195605701	0.027238298558328	pheromone receptor-like protein [Quercus robur]	1.29285E-25	CAE12164.1
contig 20680	0	17	Inf	0.0307484746790804	pentatricopeptide repeat-containing protein At2g15690 [Vitis vinifera]	6.9071E-58	XP_002285135.1		mitochondrion;	binding;	5739 5488
contig 25441	0	15	Inf	0.0458924053019967	pentatricopeptide repeat-containing protein At3g53700, chloroplastic [Vitis vinifera]	1.51084E-21	XP_002272943.1		plastid;	binding;	5488 9536
contig 5035	5	34	2.76553474636298	0.0452979151581824	plastid-targeted protein 2 [Craterostigma plantagineum]	1.02104E-15	AAK20906.1
contig 12816	1	24	4.58496250072116	0.023059268197362	putative U5 small nuclear ribonucleoprotein helicase [Arabidopsis thaliana]	2.54592E-21	NP_173520.1		mitochondrion;	ATP-dependent helicase activity; nucleic acid binding; ATP binding;	8026 3676 5524 5739
contig 4710	1	22	4.4594316186373	0.0322127979027649	signal peptidase protein-like protein [Cucumis melo subsp. melo]	3.57349E-45	AAO45754.1	signal peptide processing;	cytoplasmic membrane-bounded vesicle; integral to membrane; signal peptidase complex;	peptidase activity;	8233 16023 6465 16021 5787
contig 10705	4	32	3	0.0392343819900974	threonine dehydratase biosynthetic, chloroplastic-like [Vitis vinifera]	1.11425E-45	XP_002264311.2	isoleucine biosynthetic process; glycine metabolic process; L-serine metabolic process; threonine metabolic process;	plastid;	pyridoxal phosphate binding; L-threonine ammonia-lyase activity;	30170 9097,4794,9536,6544,6563,6566
contig 20276	0	18	Inf	0.0251830715437496	uncharacterized protein LOC100266883 [Vitis vinifera]	5.36184E-16	XP_002269394.1
contig 20539	0	25	Inf	0.00646842492734455	inter-alpha-trypsin inhibitor heavy chain H3 precursor, putative [Ricinus communis]	3.51253E-38	XP_002524155.1
contig 24017	0	16	Inf	0.037562781469146	Inter-alpha-trypsin inhibitor heavy chain H3 precursor, putative [Ricinus communis]	8.39787E-14	XP_002519799.1

## Sheet: DOWN regulated A. coronaria 
Contig id	baseMeanA	baseMeanB	log2FoldChange	pval	Seq. Description (Protein homology)	E-value	ACC number	GO biological process	GO cellular component	GO molecular function	GO number
Cell wall
contig 2286	39	1	-5.28540221886225	0.00222308911758776	Cell wall-associated hydrolase, partial [Medicago truncatula]	2.17489E-99	XP_003637074.1		mitochondrion; chloroplast;		5739 9507
					hypothetical protein MTR_4g129340 [Medicago truncatula]	1.63887E-48	XP_003610225.1
contig 177	59	10	-2.56071495447448	0.0202393500340343	hypothetical protein HMPREF9489_0022 [Finegoldia magna SY403409CC001050417] **	2.65937E-53	EGS32606.1		chloroplast;		9507
					Cell wall-associated hydrolase [Medicago truncatula]	5.73891E-52	XP_003604156.1
contig 19097	17	0	-Inf	0.0307484746790804	Cellulose synthase-like protein G3-like [Vitis vinifera]	5.353E-20	XP_002269041.2	cellulose biosynthetic process; cellular cell wall organization; starch metabolic process; sucrose metabolic process; UDP-glucose metabolic process;	integral to membrane;	cellulose synthase (UDP-forming) activity;	16760 30244 16021 7047 5982 5985 6011
contig 557	23	1	-4.52356195605701	0.027238298558328	white-brown-complex ABC transporter family [Populus trichocarpa]	1.96853E-64	XP_002306299.1	phosphonate transport; organophosphate ester transport;	membrane;	ATP binding; phosphonate transmembrane-transporting ATPase activity;	5524 15416 16020 15716 15748
contig 17626	20	0	-Inf	0.0169402081329919	Xyloglucan endotransglucosylase/hydrolase protein A precursor, putative [Ricinus communis]	5.98387E-44	ACK36946.1	cellular glucan metabolic process;	apoplast; cell wall;	hydrolase activity, hydrolyzing O-glycosyl compounds; xyloglucan:xyloglucosyl transferase activity;	4553 6073 48046 5618 16762
contig 9906	20	1	-4.32192809488736	0.0451950997680047	galactose-binding like domain containing protein [Medicago truncatula]	9.37747E-33	XP_003590248.1		plastid		9536
contig 9288	22	1	-4.4594316186373	0.0322127979027649	protein NDR1-like isoform 2 [Vitis vinifera]	6.62394E-55	XP_003633928.1
					late embryogenesis abundant hydroxyproline-rich glycoprotein [Arabidopsis thaliana]	7.95533E-36	NP_192050.1	two-component signal transduction system (phosphorelay); regulation of transcription, DNA-dependent; regulation of transcription;			160 156 6355 45449
contig 6057	34	4	-3.08746284125034	0.0308611631067309	protein NDR1-like [Vitis vinifera]	6.79E-37	XP_002273852.1
					late embryogenesis abundant hydroxyproline-rich glycoprotein [Arabidopsis thaliana]	3.54546E-19	NP_197678.1
Genes involved in defense response
contig 9205	36	1	-5.16992500144231	0.00346167930930964	myb family transcription factor [Arabidopsis thaliana]	8.73335E-4	NP_566744.1
					transcription factor, putative [Ricinus communis]	4.82787E-25	XP_002518104.1
contig 19650	20	0	-Inf	0.0169402081329919	presqualene diphosphate phosphatase [Vitis vinifera]	3.89223E-27	XP_002268694.1		membrane;	catalytic activity;	16020 3824
					PnFL-1 [Ipomoea nil]	3.71198E-26	AAG49895.1
contig 11514	17	0	-Inf	0.0307484746790804	UDP-glycosyltransferase 74E2-like [Vitis vinifera]	4.67581E-33	XP_002275170.1	metabolic process;		indole-3-acetate beta-glucosyltransferase activity;	47215 8152
					probable peptide/nitrate transporter-like [Glycine max]	8.60365E-54	XP_003516904.1
contig 11339	20	1	-4.32192809488736	0.0451950997680047	Peptide transporter PTR3-A [Medicago truncatula]	4.48652E-52	XP_003600795.1	oligopeptide transport; regulation of transcription;	integral to membrane;	DNA binding; transporter activity;	6857 3677 45449 16021 5215
contig 8555	16	0	-Inf	0.037562781469146	secologanin synthase-like [Glycine max]	1.29807E-29	XP_003543244.1	electron transport chain; electron transport;	cytoplasmic membrane-bounded vesicle;	electron carrier activity; monooxygenase activity; heme binding;	16023 9055 4497 20037 22900 6118
Other genes
contig 10703	20	1	-4.32192809488736	0.0451950997680047	alpha/beta-hydrolase domain-containing protein [Arabidopsis thaliana]	2.07162E-27	NP_180009.2			hydrolase activity;	16787
					bem46 [Ricinus comunis]	7.61823E-34	XP_003542612.1
contig 4086	17	0	-Inf	0.0307484746790804	branched-chain amino acid aminotransferase, putative [Ricinus communis]	4.37159E-22	XP_002530599.1	isoleucine catabolic process; leucine catabolic process; valine catabolic process; isoleucine biosynthetic process; leucine biosynthetic process; valine biosynthetic process; pantothenate biosynthetic process;		branched-chain-amino-acid transaminase activity;	4084 6550 6552 6574 9097 9098 9099 15940
contig 4275	88	15	-2.55254102302878	0.00909620432346741	chlorophyll a-b binding protein CP26 [Arabidopsis thaliana]	9.87127E-36	NP_192772.1	photosynthesis, light harvesting;	membrane; mitochondrion; chloroplast;		16020 5739 9765 9507
contig 19864	633	127	-2.31737700265618	0.000721703828483556	chlorophyll a-b binding protein CP26 [Arabidopsis thaliana]	2.91119E-52	NP_192772.1	photosynthesis, light harvesting;	membrane; mitochondrion; chloroplast;		16020 5739 9765 9507
contig 4292	17	0	-Inf	0.0307484746790804	chlororespiratory reduction 7 [Arabidopsis thaliana]	1.19437E-37	NP_568563.1		cytoplasmic membrane-bounded vesicle; plastid;		16023 9536
contig 1631	24	2	-3.58496250072116	0.0448228525500705	clp protease proteolytic subunit [Ranunculus macranthus]	4.69699E-31	YP_001004211.1	proteolysis;	chloroplast;	serine-type endopeptidase activity; ATP binding;	4252 5524 9507 6508
contig 2831	60	12	-2.32192809488736	0.030526347081909	uncharacterized membrane protein C24H6.13-like [Glycine max]	1.36511E-54	XP_003542948.1		cytoplasmic membrane-bounded vesicle; membrane;		16023 1602
					Early-responsive to dehydration stress protein (ERD4) [Arabidopsis thaliana]	3.48621E-48	NP_564354.1
contig 8091	18	0	-Inf	0.0251830715437496	ferric reduction oxidase 7, chloroplastic-like [Vitis vinifera]	1.55493E-26	XP_002266723.2		membrane;	oxidoreductase activity; binding;	16020 16491 5488
contig 16024	213	58	-1.87672862509827	0.014305194065829	glutamyl tRNA Reductase [Nicotiana tabacum]	1.51433E-37	CAN88916.1	chlorophyll biosynthetic process; oxidation reduction; tryptophan biosynthetic process; tyrosine biosynthetic process; L-phenylalanine biosynthetic process;	chloroplast;	shikimate 5-dehydrogenase activity; NADP or NADPH binding; glutamyl-tRNA reductase activity;	4764 50661 15995 55114 9507 8883 162 6571 9094
contig 4448	36	4	-3.16992500144231	0.0243334488417653	inner membrane protein PPF-1, chloroplastic isoform 2 [Vitis vinifera]	5.14995E-4	XP_003632199.1
contig 2794					iron-sulfur protein NUBPL-like [Brachypodium distachyon]	9.58031E-56	XP_003559661.1		mitochondrion;	nucleoside-triphosphatase activity; ATP binding;	17111 5524 5739
	20	0	-Inf	0.0169402081329919	ATP-binding protein involved in chromosome partitioning [Arabidopsis thaliana].	1.95915E-38	NP_193689.1
contig 2741	17	0	-Inf	0.0307484746790804	Isp4-like protein [Arabidopsis thaliana]	1.92287E-33	BAB09872.1	transmembrane transport;			55085
					OPT4 [Arabidopsis thaliana]	1.92E-33	Q9FME8.1
contig 4734	38	4	-3.24792751344359	0.0192373619484666	kinesin light chain [Zea mays]	1.36654E-38	ACG25477.1		plastid;	binding;	5488 9536
contig 12342	16	0	-Inf	0.037562781469146	polynucleotide 5'-hydroxyl-kinase NOL9 [Vitis vinifera]	6.68415E-29	XP_002267234.
					Pre-mRNA cleavage complex II protein family [Arabidopsis thaliana]	3.82679E-27	NP_850805.1
contig 4798	27	2	-3.75488750216347	0.0288147949009923	pyruvate,orthophosphate dikinase [Arabidopsis thaliana]	3.7052E-79	BAF01871.1	phosphorylation; photosynthesis; pyruvate metabolic process; carbon utilization;	chloroplast;	metal ion binding; pyruvate, phosphate dikinase activity; kinase activity; ATP binding;	46872 50242 16301 16310 5524 9507 15979 6090 15976
contig 3733	17	0	-Inf	0.0307484746790804	serine/threonine-protein kinase TOR-like isoform 2 [Glycine max]	1.82211E-63	XP_003538335.1			kinase activity; ATP binding; phosphotransferase activity, alcohol group as acceptor;	16301 5524 16773
contig 12664					SEH1H	1.2E-46	XP_002303641.1	cellular metabolic process	membrane	coenzyme binding; catalytic activity;	44237 50662 16020 3824
contig 1637	20	1	-4.32192809488736	0.0451950997680047	short chain alcohol dehydrogenase, putative [Ricinus communis]	4.08751E-50	XP_002512852.1	oxidation reduction;	mitochondrion;	binding; oxidoreductase activity, acting on the CH-OH group of donors, NAD or NADP as acceptor;	55114 5739 5488 16616
					sex determination protein tasselseed-2-like isoform 2 [Glycine max]	1.48968E-49	XP_003521528.1
contig 6727	33	2	-4.04439411935845	0.0121949772765786	ubiquitin-like protein 5 [Arabidopsis thaliana]	7.26274E-45	NP_199045.1
contig 4980	15	0	-Inf	0.0458924053019967	vacuolar-sorting receptor 1-like [Vitis vinifera]	8.94752E-45	XP_002267833.2	signal transduction;	membrane; cytoplasmic membrane-bounded vesicle; plastid;	receptor activity; calcium ion binding; protein binding;	16020 16023 4872 5509 5515 9536 7165
contig 12664	20	0	-Inf	0.0169402081329919	uncharacterized protein [Arabidopsis thaliana]	1.08276E-44	NP_564831.2	cellular metabolic process;	membrane;	coenzyme binding; catalytic activity;	44237 50662 16020 3824
contig 553	129	27	-2.25633975325979	0.0094209023672262	putative capsid protein [Primula malacoides virus China/Mar2007] *	3.57349E-32	YP_003104769.1
contig 1137	16	0	-Inf	0.037562781469146	---NA---
contig 11575	15	0	-Inf	0.0458924053019967	---NA---
contig 13161	17	0	-Inf	0.0307484746790804	---NA---
contig 13467	71	15	-2.24285652389616	0.02678149270776	---NA---
contig 13854	223	57	-1.96800988575556	0.0100564464500203	---NA---
contig 15185	20	0	-Inf	0.0169402081329919	---NA---
contig 16446	415	85	-2.28757659009659	0.00134164808677223	---NA---
contig 16691	19	0	-Inf	0.0206425492165012	---NA---
contig 18225	18	0	-Inf	0.0251830715437496	---NA---
contig 18780	18	0	-Inf	0.0251830715437496	---NA---
contig 19179	118	34	-1.7951802081115	0.0362241615301847	---NA---
contig 1995	49	0	-Inf	0.000126365576798691	---NA---
contig 2118	20	0	-Inf	0.0169402081329919	---NA---
contig 2437	17	0	-Inf	0.0307484746790804	---NA---
contig 3769	44	5	-3.13750352374994	0.0152617536974828	---NA---
contig 60	357	77	-2.2129937233342	0.00222479361773024	---NA---
contig 8662	43	4	-3.4262647547021	0.0108358955911498	---NA---
contig 8953	16	0	-Inf	0.037562781469146	---NA---
